# Supplementary material
Source: PubMed Central journal article supplement (PMC4994754)
Supplement: supp_evv205_SupplementaryInfomation.pdf [file supp_evv205_SupplementaryInfomation.pdf]

# **Methylated cytosines mutate to transcription factor binding sites that drive tetrapod evolution**

Ximiao He<sup>1</sup>, Desiree Tillo<sup>1</sup>, Jeff Vierstra<sup>2</sup>, Syed Khund-Sayeed<sup>1</sup>, Callie Deng<sup>1</sup>, G. Jordan Ray<sup>1</sup>, John Stamatoyannopoulos<sup>2</sup>, Peter C. Fitzgerald<sup>3</sup>, Charles Vinson<sup>1@</sup>

<sup>1</sup>Laboratory of Metabolism, NCI, NIH,

<sup>2</sup>Department of Genome Sciences, University of Washington, WA, 98195,

<sup>3</sup>Genome Analysis Unit, Genetics Branch, NCI, NIH, Bethesda, MD 20892, USA.

@Corresponding author, Tel: (301) 496-8753, Fax: (301) 496-8419, E-mail: [Vinsonc@mail.nih.gov](mailto:Vinsonc@mail.nih.gov)

**Running Title:** 5mC mutate to TFBS that drives tetrapod evolution

**Keywords:** CG dinucleotide, tissue specific, C/EBP, TFBS, AP-1, CG methylation, coelacanth, TG dinucleotide.

## Supplementary Information

### Supplementary Figure Legend:

#### **Figure S1. The bimodal distribution of abundance of 8-mers initially occurs in the coelacanth.**

Histogram showing the abundance of 32,896 continuous 8-mers in eukaryotic genomes: (A) Human, (B) Mouse, (C) Dog, (D) Elephant, (E) Opossum, (F) Wallaby, (G) Mink whale, (H) Dolphin, (I) Chicken, (J) Lizard, (K) *Xenopus*, (L) Coelacanth, (M) Elephant shark, (N) Zebrafish, (O) Nile Tilapia (P) Cod, (Q) Stickleback, (R) Fugu, (S) Tetraodon, (T) Fly, (U) Bee, (V) *C. Elegans*, (W) Arabidopsis and (X) Yeast. The x-axis displays the frequency of each 8-mer in the genome (8-mer occurrence per 100Kb), and the y-axis indicates the number of 8-mers with that frequency in the genome.

**Figure S2. Abundance of 8-mers in human genome in conserved non-coding elements.** (A) For each continuous 8-mer, the occurrence in human genome is plotted on the horizontal axis vs. the percentage in the CNEs representing 2.6% of the genome, plotted on the vertical axis. The histogram on the left shows the distribution of percentage of 8-mers in CNEs. The 8-mers are divided into 3 groups based on the presence of the CG and TG dinucleotide. (B) Same as in (A), but with log scale axes. (C) Same as in **Figure S2B**, but for CG-containing 8-mers only.

**Figure S3. Abundance of 8-mers in human genome in different groups of CNEs.** (A-G) For each continuous 8-mer, the occurrence in human genome is plotted on the horizontal axis vs. the enrichment in the each group of species-specific CNEs (from stickleback to dog) plotted on the vertical-axis. The 8-mers are divided into 3 groups based on the presence of the CG and TG dinucleotide. The species-specific CNEs are including: (A) Stickleback, (B) Coelacanth, (C) *Xenopus*, (D) Lizard/Chicken, (E) Opossum, (F) Elephant, and (G) Dog. Calculation of 8-mers in the mouse-specific CNEs is not shown due to the low coverage in the human genome (0.03% of human genome), resulting in non-significant values of 8-mer enrichment.

**Figure S4. Abundance of three groups of 8-mers in the human genome versus their occurrence in DHSs.** (A-C) For each continuous 8-mer, the occurrence in human genome is plotted on the horizontal axis vs. the percentage in the regulatory regions represented 9.0% of the genome (DNase I hypersensitive sites, DHSs) plotted on the vertical-axis. The histogram below the scatterplot shows the distribution of

abundance of all 8-mers in human, and the histogram on the left shows the distribution of the percentage of 8-mers within DHSs. The 8-mers are divided into 3 groups: **(A)** no CG or TG; **(B)** with TG but not CG; and **(C)** with CG.

**Figure S5. Abundance of 8-mers in the mouse genome versus their occurrence in DHSs.** For each continuous 8-mer, the occurrence in mouse genome is plotted on the horizontal axis vs. the percentage in the regulatory regions (DNase I hypersensitive sites, DHSs) representing 10.2% of the genome plotted on the vertical-axis. The histogram below the scatterplot shows the distribution of abundance of all 8-mers in mouse, and the histogram on the left shows the distribution of the percentage of 8-mers within DHSs. 8-mers are divided into 3 groups based on the presence of the CG and TG dinucleotides as indicated in the legend.

**Figure S6. Abundance of CG containing 8-mers in human genome versus their occurrence in DHSs.** **(A)** For each continuous 8-mer, the occurrence in human genome is plotted on the horizontal axis vs. their percentage within DHSs covering 9.0% of the genome plotted on the vertical-axis. The 8-mers with CGs are divided into 4 groups based on the number of CGs in each 8-mer. **(B)** same as in **(A)**, but with log scale axes.

**Figure S7. Abundance of 8-mers in human genome in DHSs +/- CNEs.** **(A-D)** For each continuous 8-mer, the occurrence in human genome is plotted on the horizontal axis vs. the percentage within DHSs **(A)** overlapping conserved non-coding elements (DHSs+CNEs) representing 1.6% of the genome, and **(B)** those that do not (DHSs-CNEs) representing 7.4% of the genome is plotted on the vertical-axis. The 8-mers are divided into 3 groups based on the presence of the CG and TG dinucleotide. **(C-D)** Similar to **(A-B)**, but vertical-axes is enrichment of 8-mers and the DHSs are divided into two groups: **(C)** DHSs+CNEs and **(D)** DHSs-CNEs.

**Figure S8. Enrichment of continuous 8-mers in human DHSs identified in 125 samples.** **(A-C)** All the DHS are divided into 125 groups based on how many samples the DHS overlapped. The boxplots of enrichment of 8-mer in each sample number DHSs for the three groups of 8-mers: **(A)** no CG or TG; **(B)** with TG but not CG; and **(C)** with CG. **(D)** The percentage of DHSs representing in human genome for 125 DHS groups based on sample numbers. **(E)** The percentage of DHSs representing in human genome

for six DHS groups based on sample numbers: Group 1 (only 1 sample); Group 2 (2 to 5 samples); Group 3 (6 to 20 samples); Group 4 (21 to 60 samples); Group 5 (61 to 124 samples) and Group 6 (all 125 samples, HK-DHSs).

**Figure S9. Enrichment of continuous 8-mers in human DHSs identified in 125 samples.** All the DHS are divided into 6 groups based on how many samples the DHS overlapped: Group 1 (only 1 sample); Group 2 (2 to 5 samples); Group 3 (6 to 20 samples); Group 4 (21 to 60 samples); Group 5 (61 to 124 samples) and Group 6 (all 125 samples, HK-DHSs). The 8-mer enrichment was plotted between Groups 1-5 (**A-E**) against Group 6.

**Figure S10. TG containing 8-mers are enriched in tissue-specific DHSs in mouse.** (A) For each continuous 8-mer, the percentage in the DHSs common to 55 mouse samples that represents 0.2% of the genome (HK-DHS) is plotted on the horizontal axis vs. the percentage in the tissue specific regulatory regions representing 10.0% of the genome (TS-DHS) plotted on the vertical-axis. The 8-mers are divided into 3 groups based on the presence of the CG and TG dinucleotide. (B) Same as in (A) but with the x-axis zoomed in.

**Figure S11. NF-1 motifs are enriched in tissue-specific DHSs in human.** For each continuous (NNNN- $K_0$ -NNNN) and discontinuous 8-mer containing pairs of 4-mers separated by 1-bp to 14-bps (NNNNK<sub>(1-14)</sub>NNNN), the enrichment in HK-DHSs is plotted on the horizontal axis vs. enrichment in TS-DHS. The 8-mers are color-coded based on the number of CGs. The AP-1 motifs (TGA-TCA) and NF-1 motif (TTGGCA---TGCCAA) are identified by different spacers between two 4-mers.

**Figure S12. GR motifs are enriched in tissue-specific DHSs in human and mouse.** For each discontinuous 8-mer with GR-like format (N-NNN---NNN-N), the enrichment in HK-DHSs is plotted on the horizontal axis vs. enrichment in TS-DHS for (A) mouse and (B) human genome. The 8-mers are color-coded based on the number of CGs. The GR motif (G-ACA---TGT-C) was identified as TS-DHS enriched.

**Figure S13. Genome coverage for human DHSs identified in 125 samples and mouse DHSs identified in 55 samples.** All the human DHS are divided into 6 groups based on how many samples the DHS overlapped (tissue-specificity): Group 1 (only 1 sample); Group 2 (2 to 5 samples); Group 3 (6 to 20 samples); Group 4 (21 to 60 samples); Group 5 (61 to 124) and Group 6 (all 125 samples, HK-DHSs). (A)

Percentage of the genome covered by group. Similar to mouse DHSs. (A) The DHS in each group identified by tissue specificity are divided into evolutionary types (Common, Human/Mouse-specific and Human/Mouse-unique DHSs) for human (A) and mouse (B).

**Figure S14. AP-1 motifs are most enriched in the tissue-specific DHSs that are also unique and specific to human genome.** Enrichment of 8-mers in the overlap of DHSs types by evolution (Common, Human-specific and Human-unique) and by specificity in cells in human genome. The enrichment in HK-DHSs (Group 6: all 125 cells) is plotted on the horizontal axis vs. enrichment in TS-DHS (Group 3: 6 to 20 cells) for all 8-mers (A-C) color coded by CG/TG occurrence in: (A) Human-unique DHSs, (B) Human-specific DHSs, and (C) Common DHSs. (D-F) The enrichment for 8-mers without CGs (-TG-CG, and +TG-CG) was plotted in (D) Human-unique, (E) Human-specific and (F) Common DHSs in human.

**Figure S15. AP-1 motifs are most enriched in the tissue-specific DHSs that are also unique and specific to mouse genome.** Enrichment of 8-mers in the overlap of DHSs types by evolution (Common, Mouse-specific and Mouse-unique) and by specificity in cells in mouse genome. The enrichment in HK-DHSs (Group 6 : all 55 samples) is plotted on the horizontal axis vs. enrichment in TS-DHS (Group 3: 5 to 12 samples) for all 8-mers (A-C) color coded by CG/TG occurrence in: (A) Mouse-unique DHSs, (B) Mouse-specific DHSs, and (C) Common DHSs. (D-F) The enrichment for 8-mers without CGs -TG-CG, and +TG-CG) was plotted in (D) Mouse-unique, (E) Mouse-specific and (F) Common DHSs in mouse.

**Figure S16 Intrinsic nucleosome occupancy scores for AP-1 motifs in human and mouse. (A)** Average intrinsic nucleosome occupancy score (INOS) for 177,730 AP-1 motifs ( $TGA^C/GTCA$ ) in DNase I hypersensitive sites (+DHS, blue), and 282,498 motifs not in DHSs (-DHS, black) within  $\pm 150$ -bps from the center of AP-1 motif ( $TGA^C/GTCA$ ) in human. (B) Similar to (A) but for AP-1 motifs in mouse. (C) Average INOS near ( $\pm 150$ -bps) AP-1 motifs in common DHSs in human for the 10,501 motifs with exact AP-1 motif in mouse genome (purple), and the 17,938 motifs without exact AP-1 motif in mouse genome (red). (D) Similar to (C) but for AP-1 motifs in common DHSs in mouse. (E) Average INOS near ( $\pm 150$ -bps) AP-1 motifs in human-specific DHSs for the 5,591 motifs with exact AP-1 motif in mouse genome (purple), and the 55,338 motifs without exact AP-1 motif in mouse genome (red). (F) Similar to (E), but for AP-1 motifs in mouse-specific DHSs.

**Supplementary Tables:**

**Table S1.** (A) Occurrence of 8-mers in human genome (hg19). (B) Occurrence of 8-mers in mouse genome (mm9). (C) Occurrence of 8-mers in simulated mouse genome with the same 2-mer frequency

**Table S2.** The genome percentage of CNEs covered by DHSs (Specific for each lineage).

**Table S3.** Description of 75 samples of human DHSs.

**Table S4.** The most enriched TG-containing 8-mers in TS-DHSs in Human (Top 20)

**Table S5.** The outlier 8-mers in **Figure 4** and their statistical significance.

**Table S6.** (A) The enrichment of E-Box motifs in human DHSs (TOP 20). (B) The enrichment of AP-1 motifs in human DHSs (TOP 20).

**Table S7.** The MRCA (most recent common ancestor) sequence to variations of 11mers with TGACTCA in human.

**Table S8.** (A-I) the MRCA (most recent common ancestor sequence) to variations of 11mers with TGACTCA in three groups 1) in CNEs and in DHSs; 2) in CNEs and no DHSs and 3) no CNEs for (A) Stickleback, (B) Coelacanth, (C) Xenopus, (D) Chicken, (E) Lizard, (F) Opossum, (G) Elephant, (H) Dog, (I) Mouse. The first two sections for each table are number and percentage of the base component of each position. The “Conserved” section shows the number and percentage of the AP-1 consensus motif in each group. For the “Variations” section, the first and last 2 “N”, the percentage indicates the base component at each position. For the middle 7 positions of AP-1 motif, the “0.0%” indicates the consensus base, while the percentage of each base indicates the variation component at each position. For example, in position 3, the variation component is A→T, C→T, and G→T.

Figure S1. Abundance of 8-mers in eukaryotic genomes

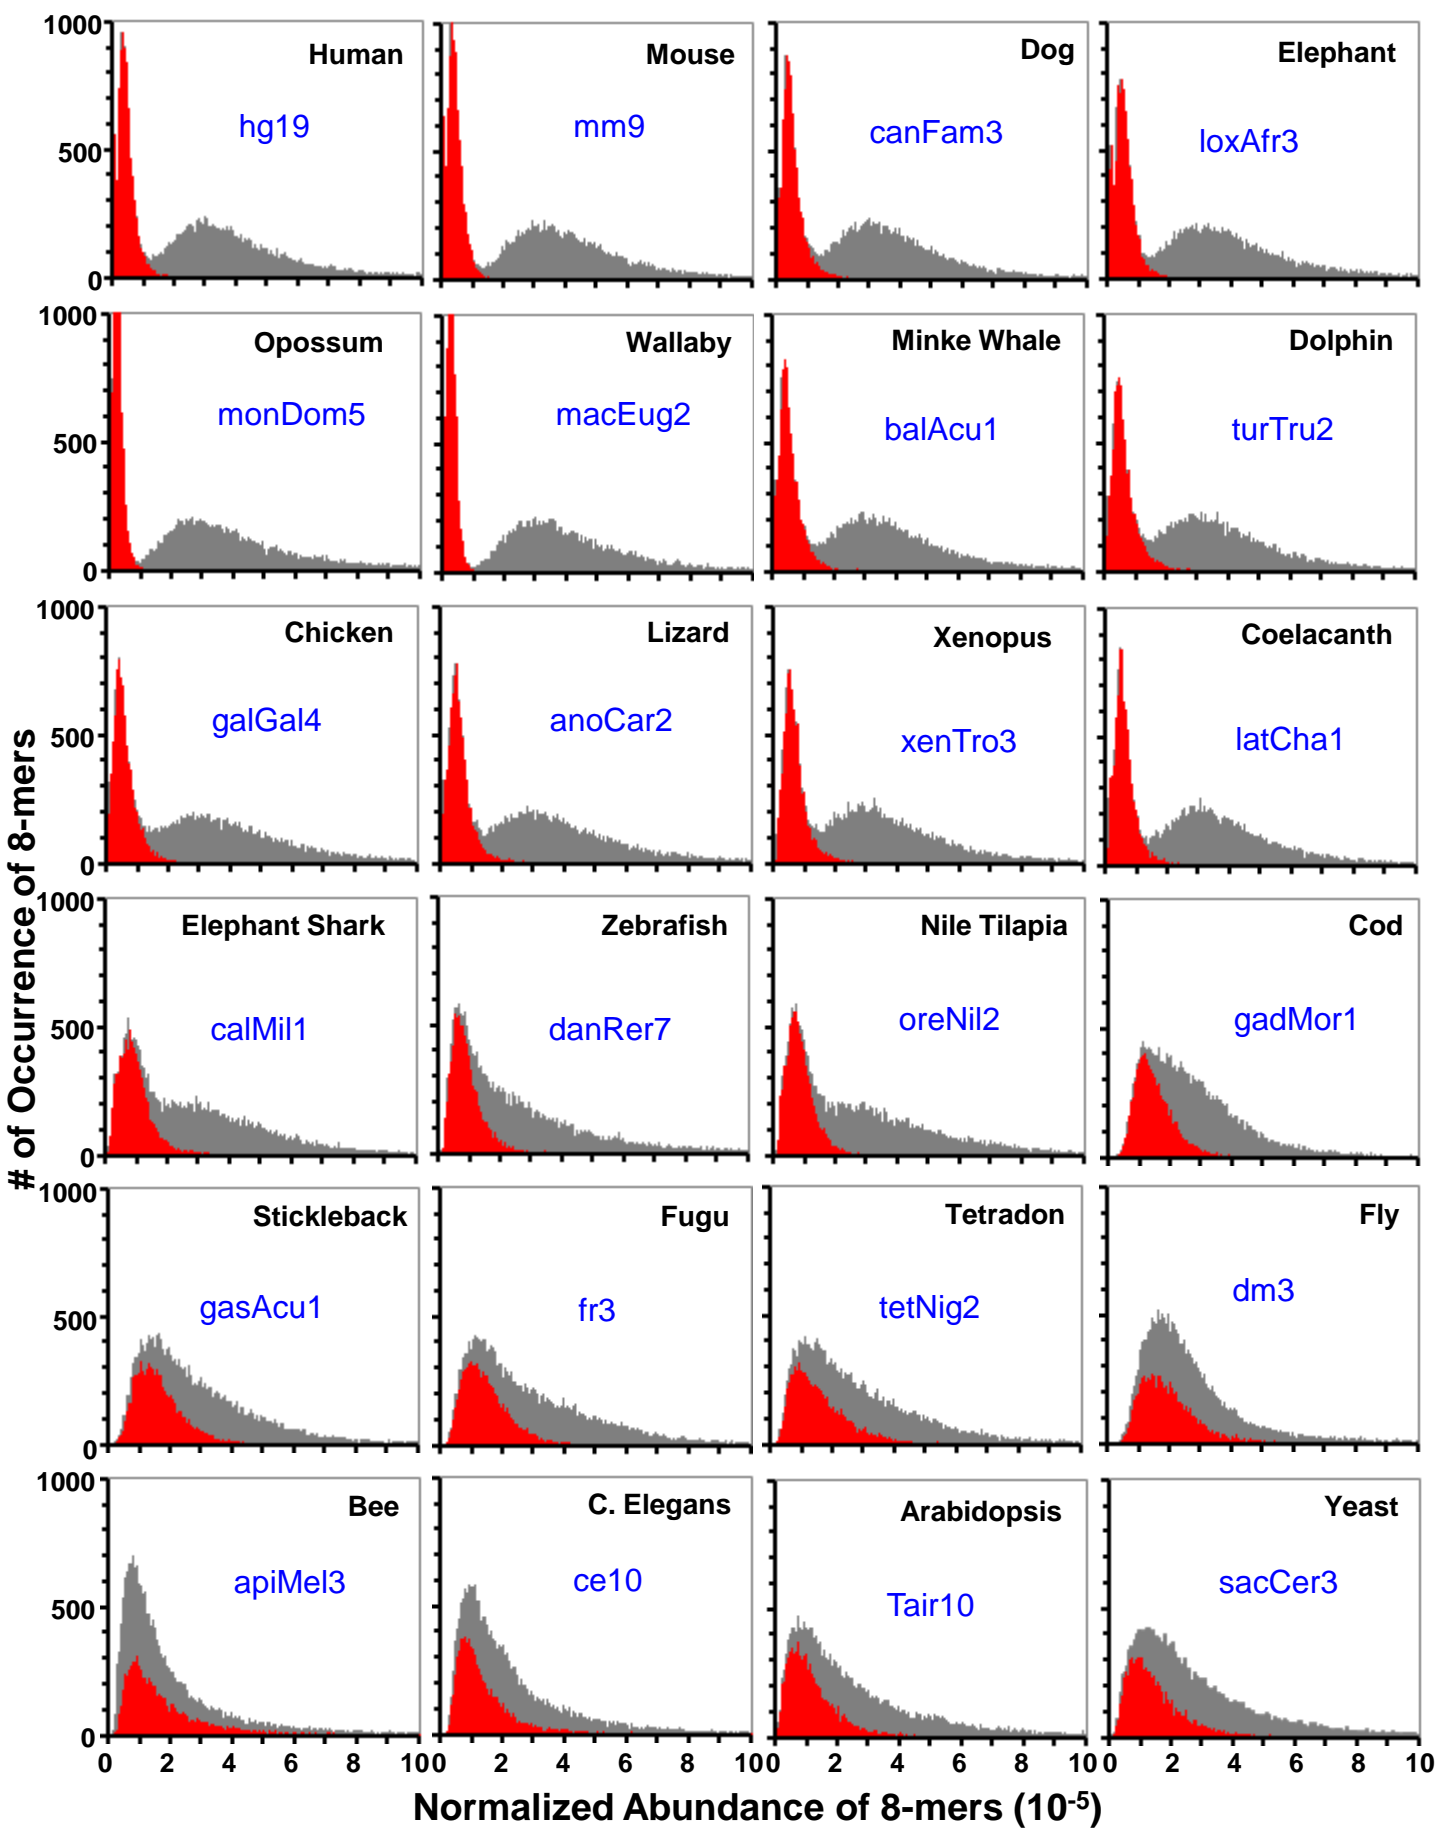

Figure S2

A

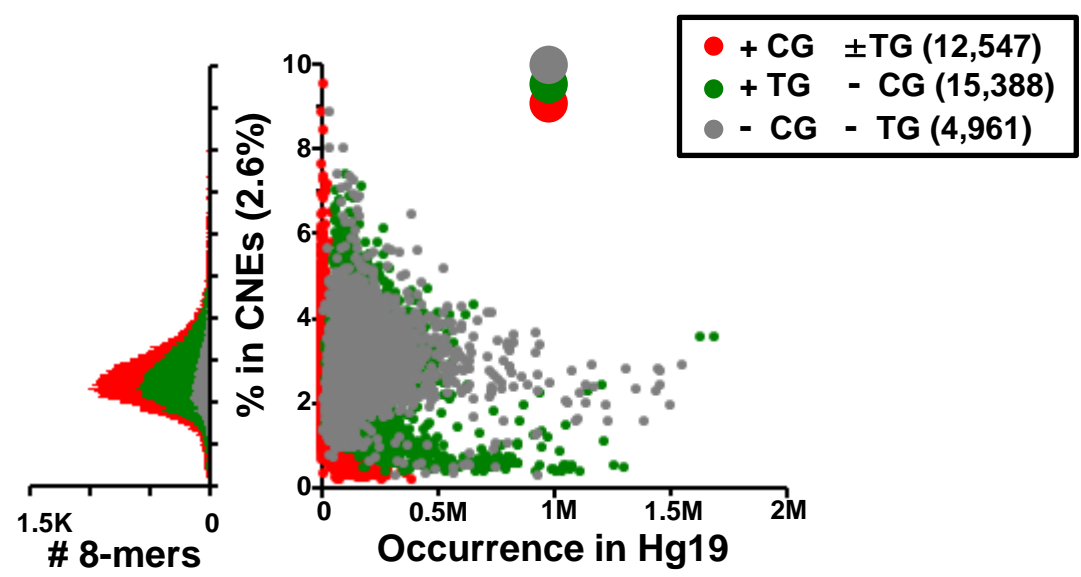

B

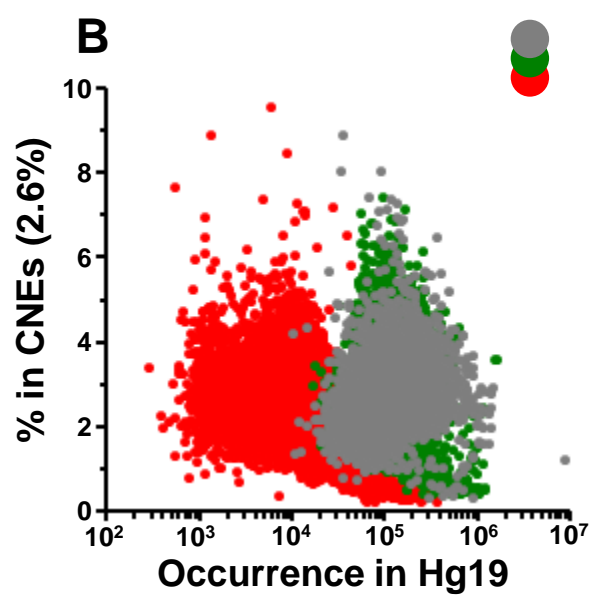

C

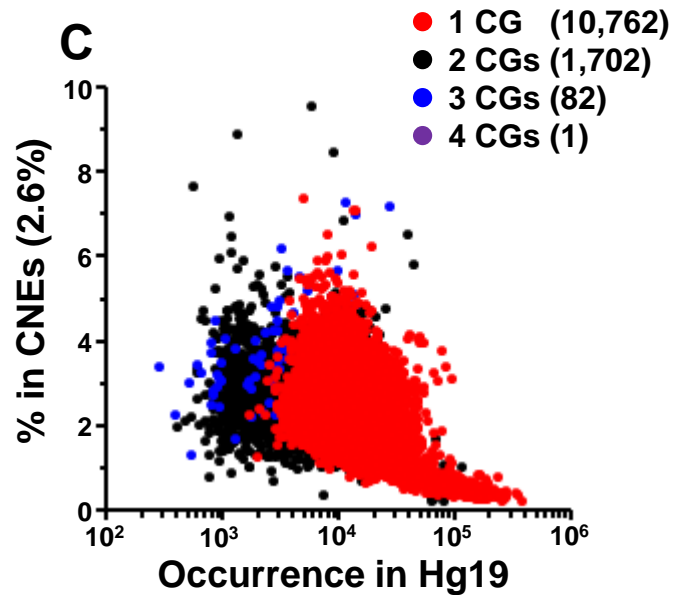



Figure S3 Enrichment of 8-mers in CNEs

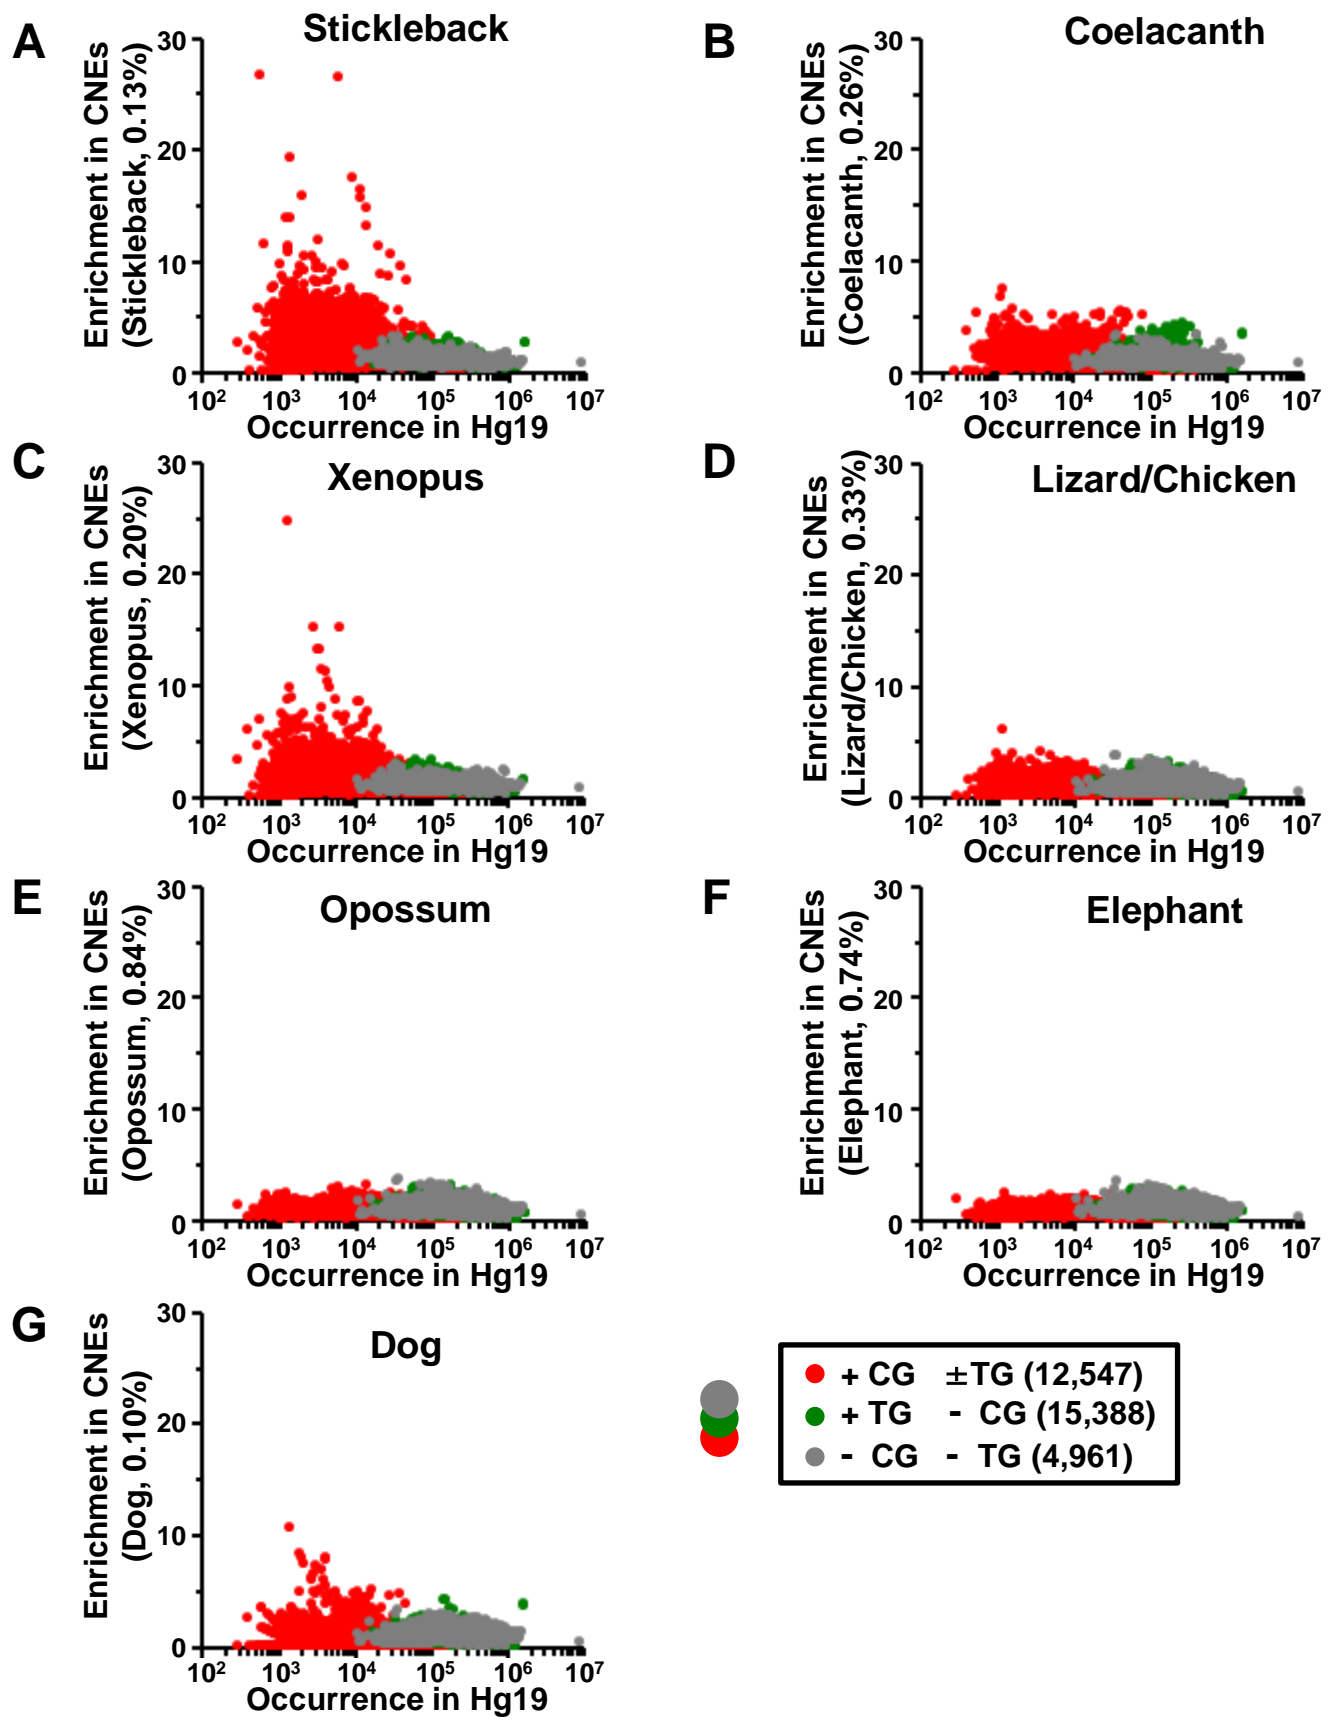

Figure S4 8-mer in different groups in human genome and DHSs

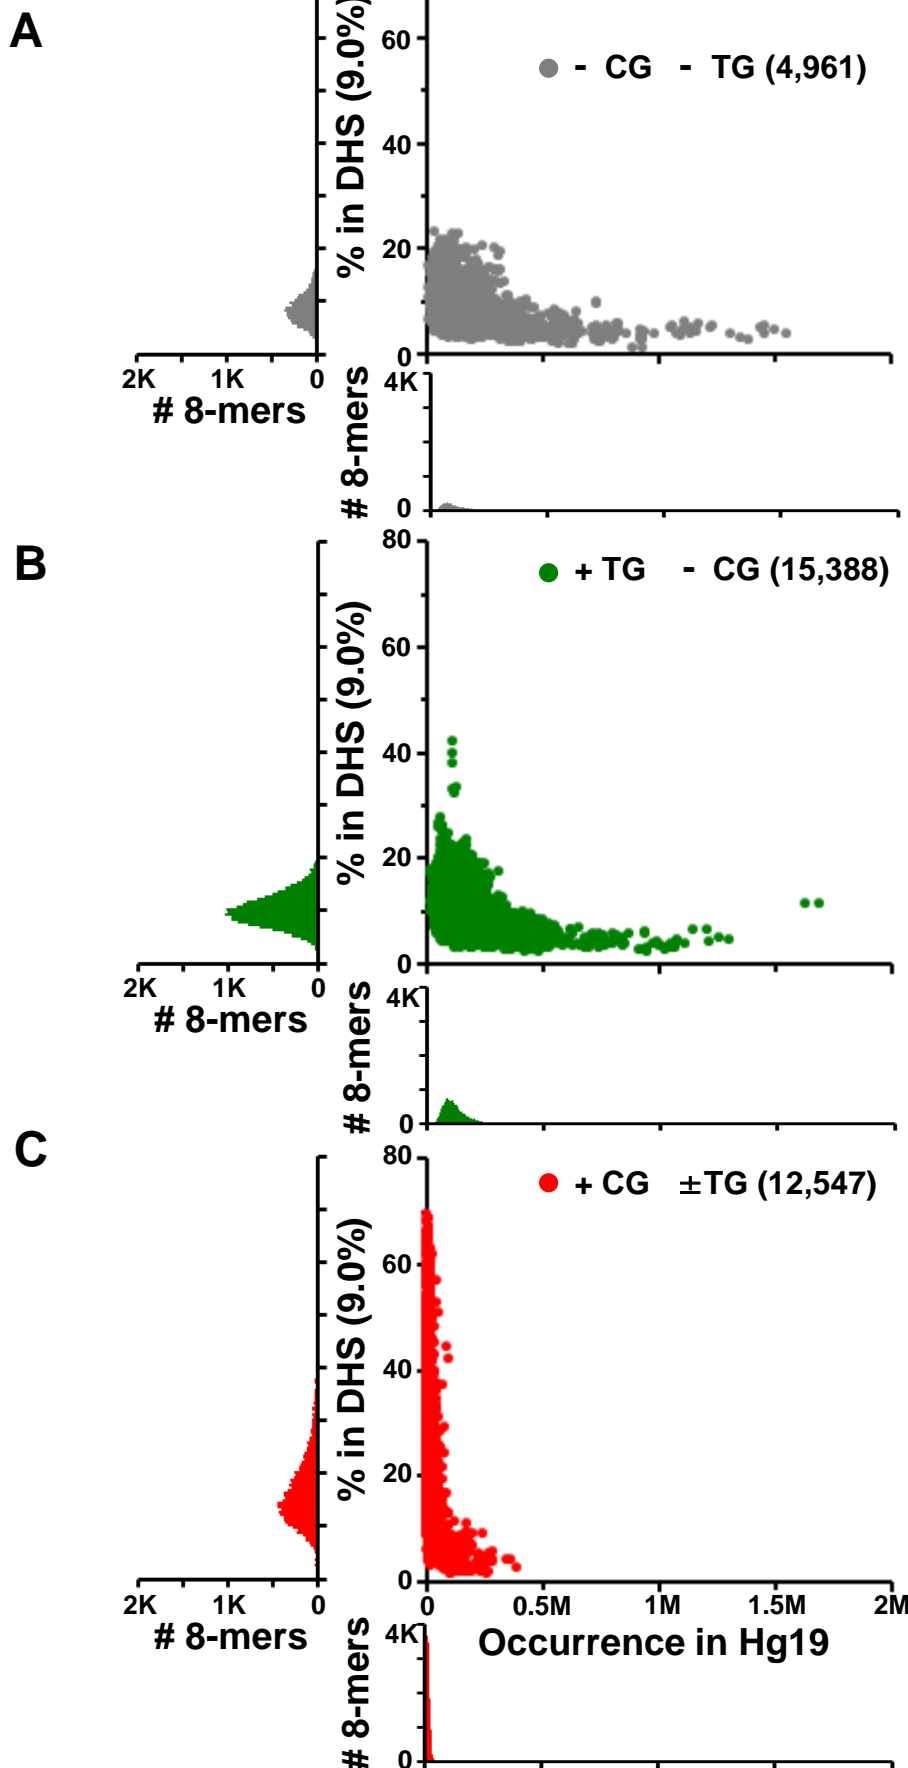

Figure S5

Mouse (55 samples)

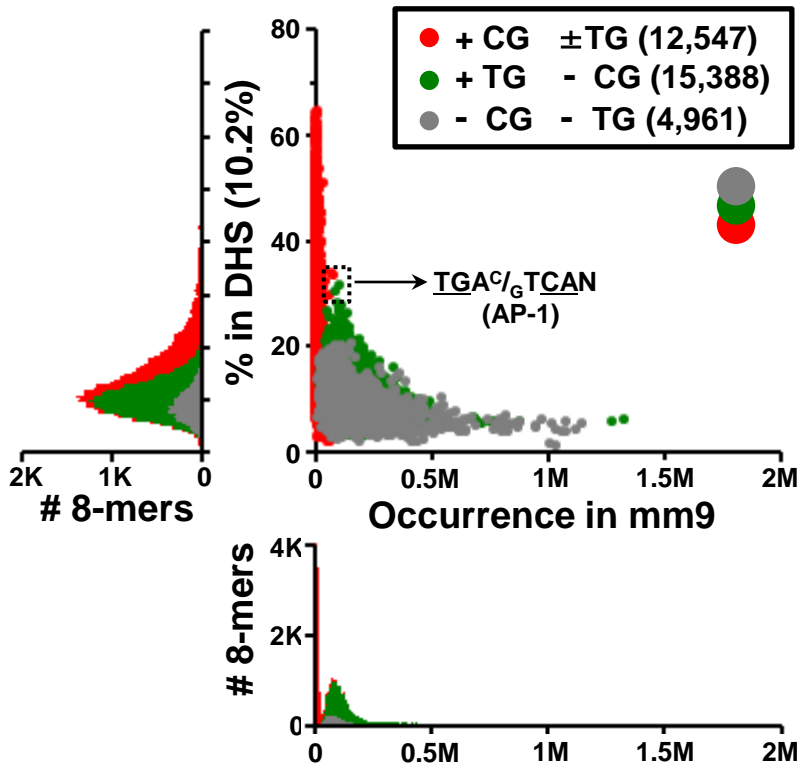

Figure S6. 8-mer with CGs in human genome and DHSs

Human (75 samples)

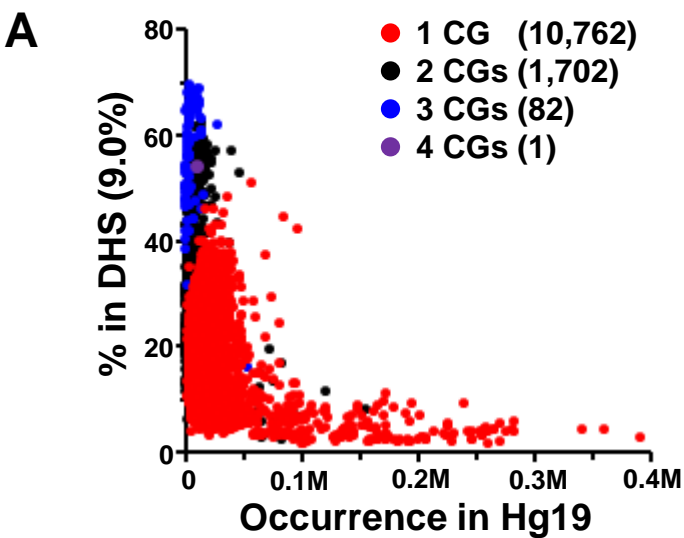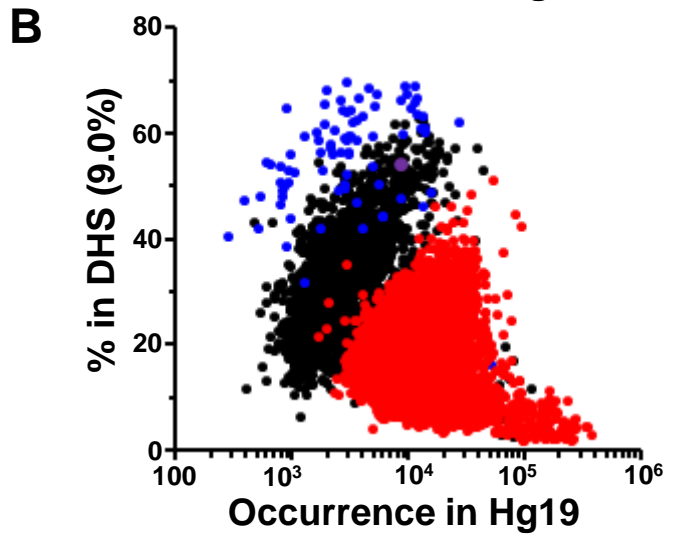

Figure S7

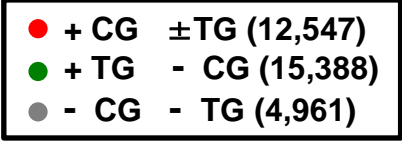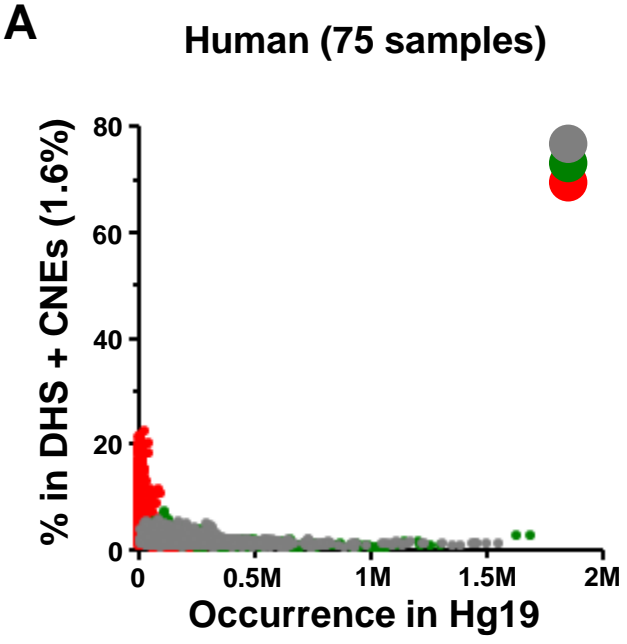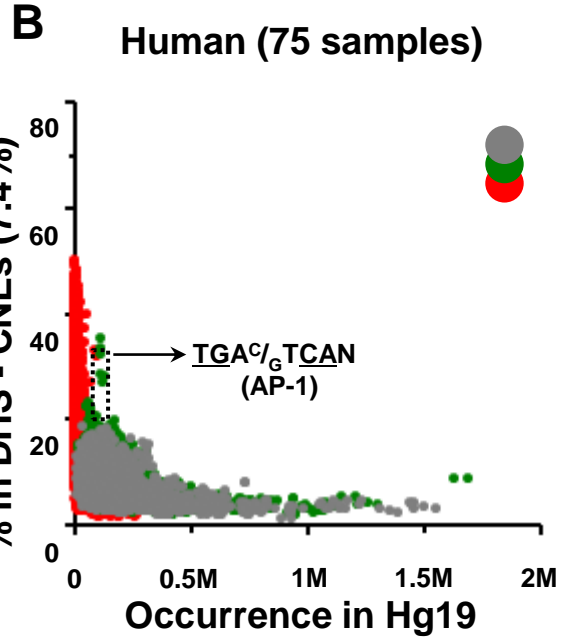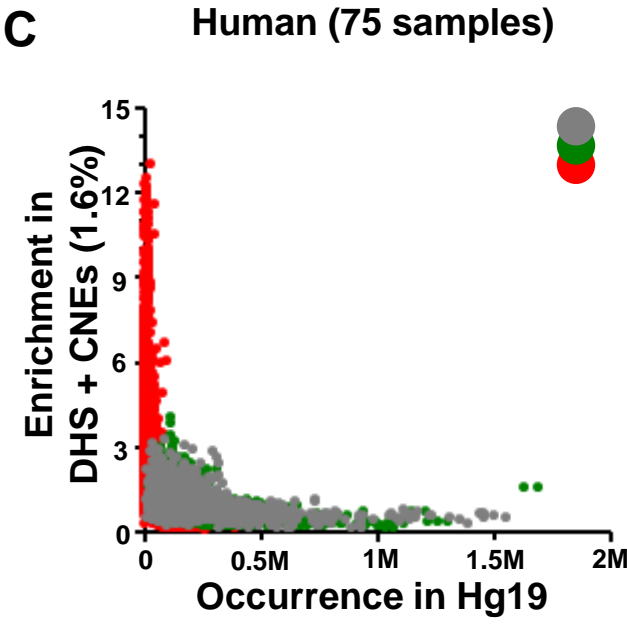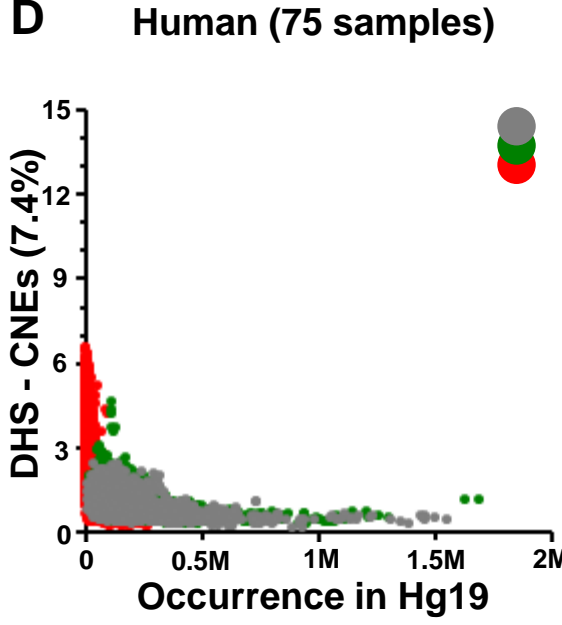

Figure S8: Enrichment of 8-mers in human DHSs by shared sample numbers

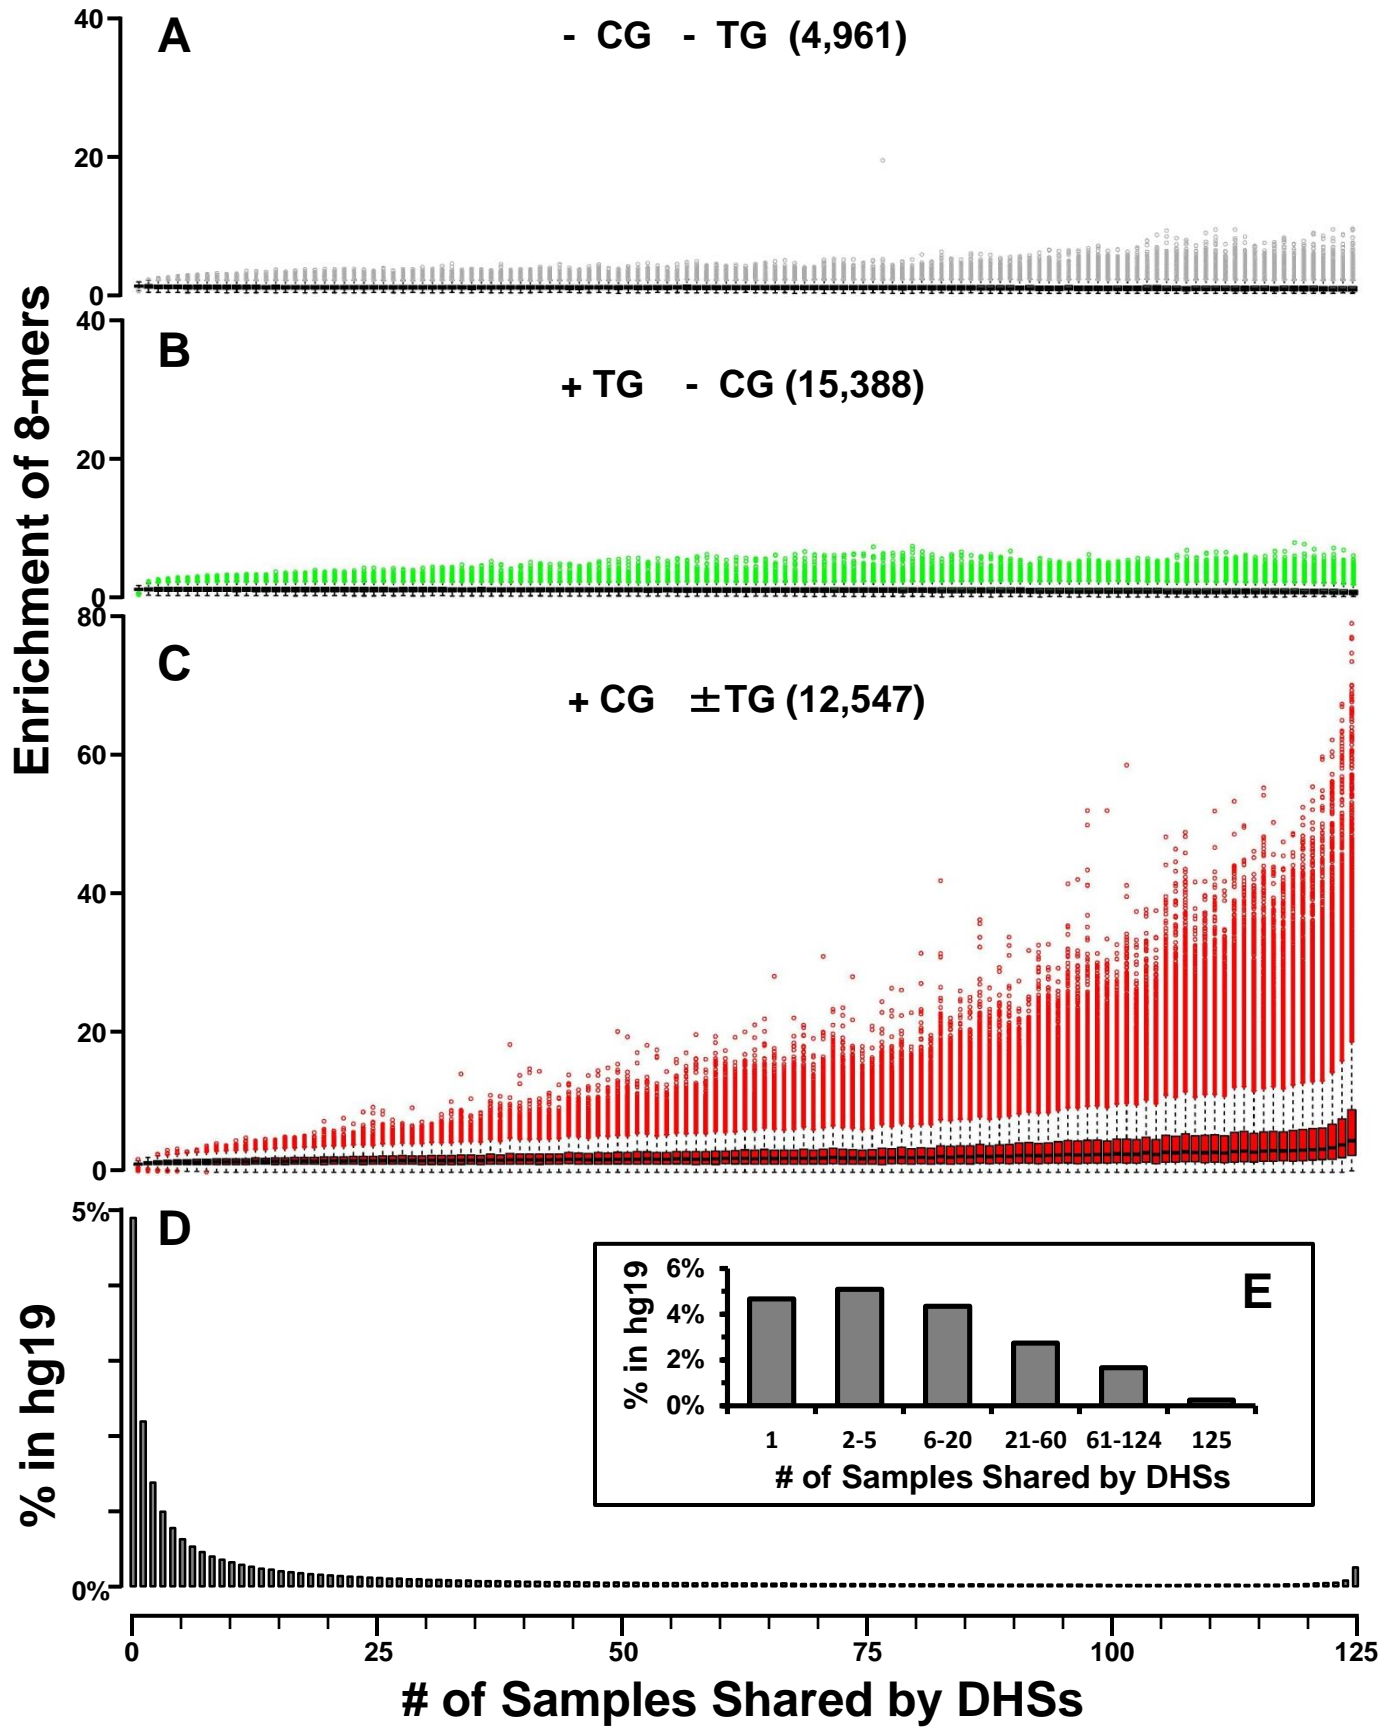

Figure S9: Enrichment of 8-mers in human DHSs

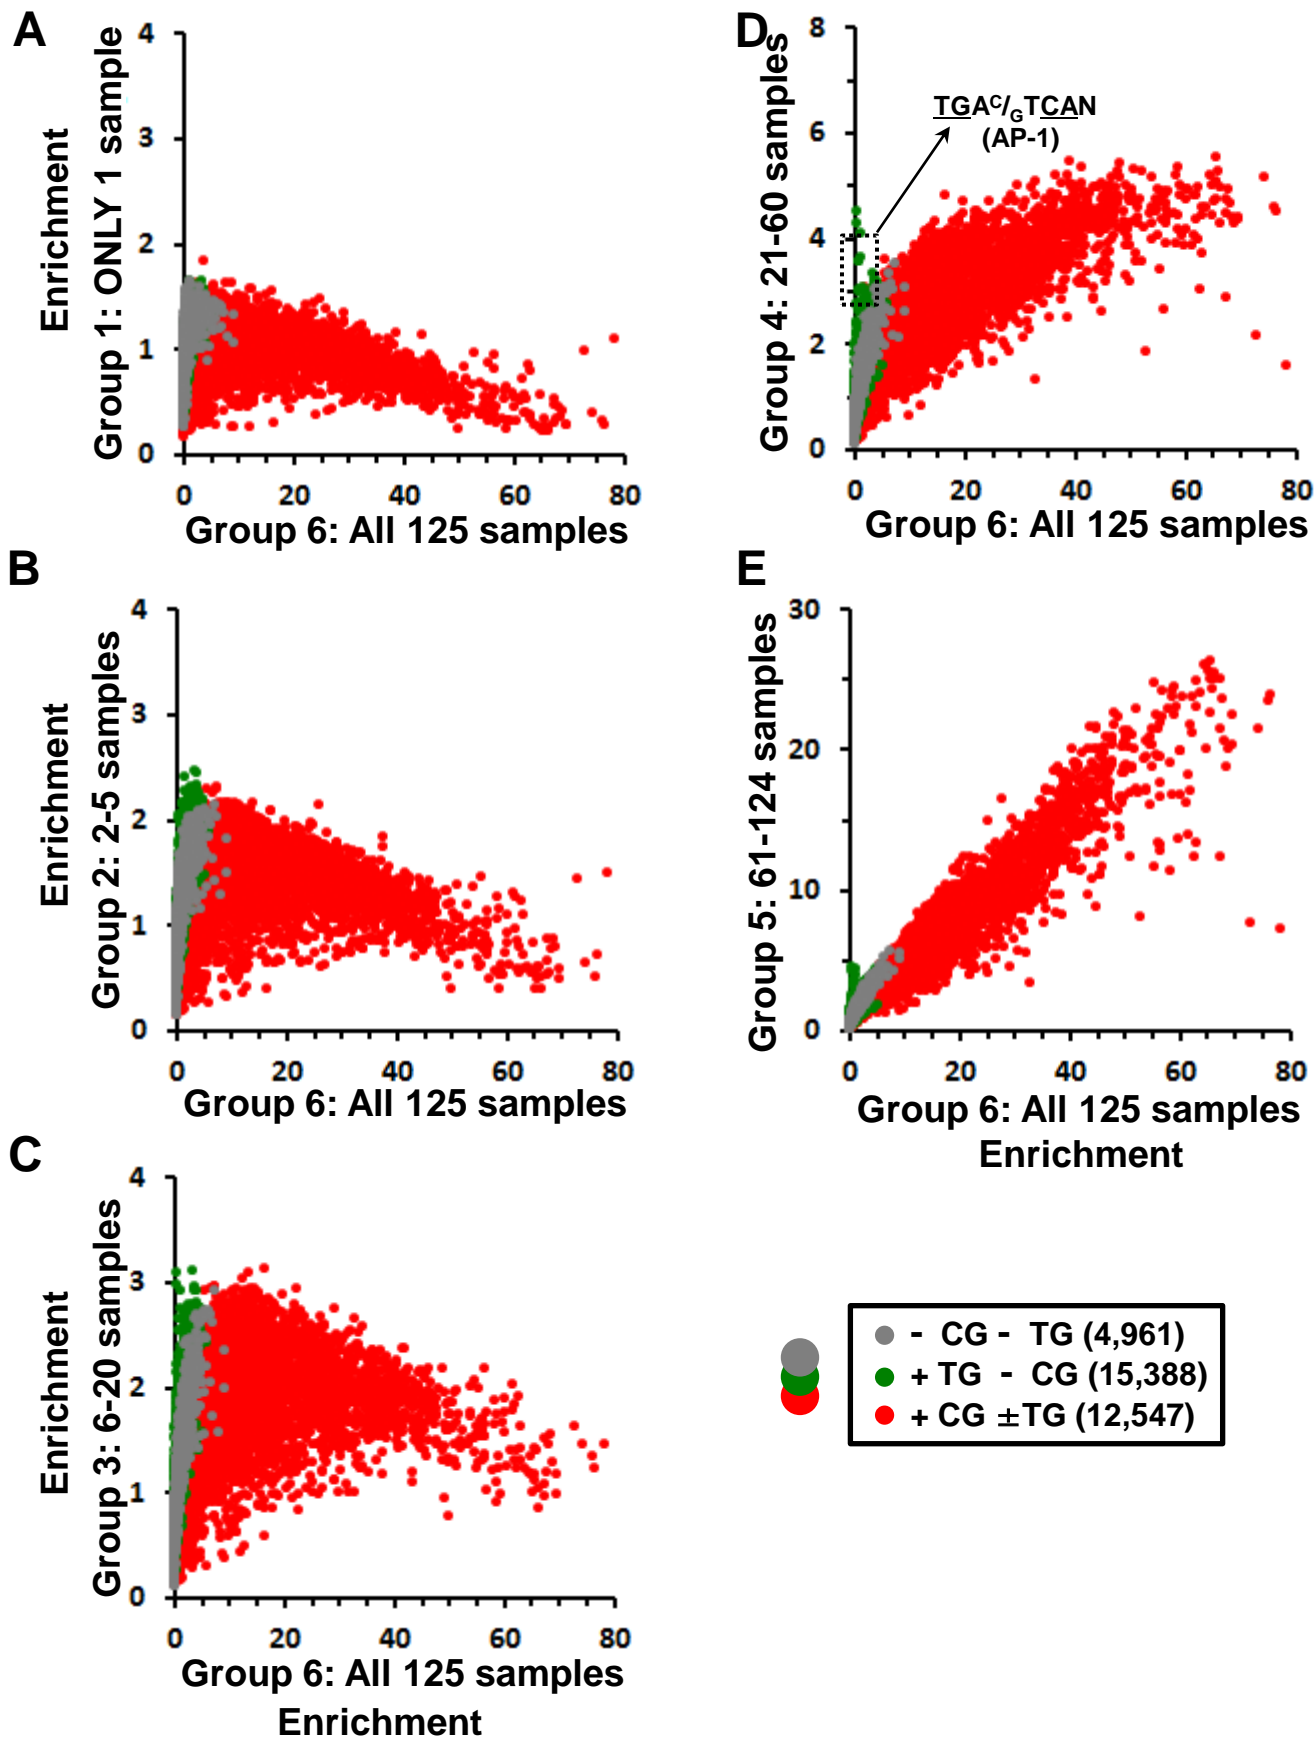

Figure S10

**A**

Mouse (55 Samples)

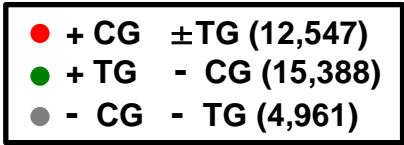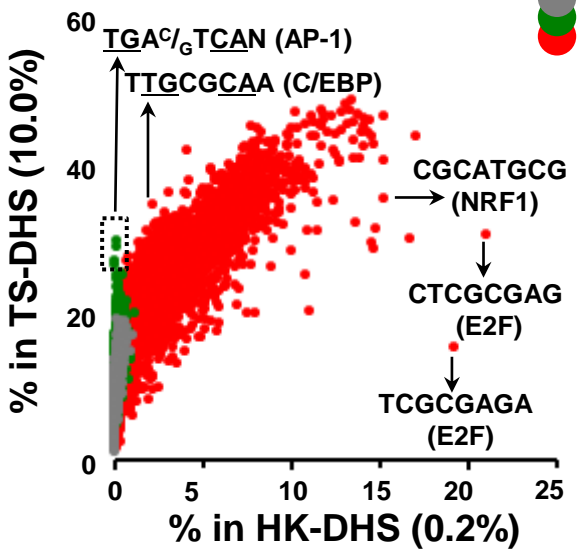

**B**

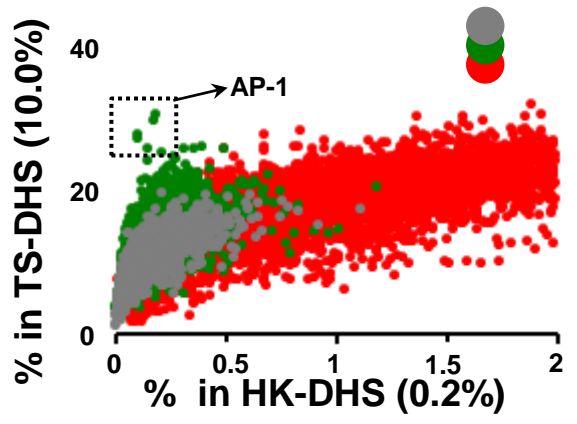



Figure S11. split 8-mers enriched in tissue specific DHSs in Human

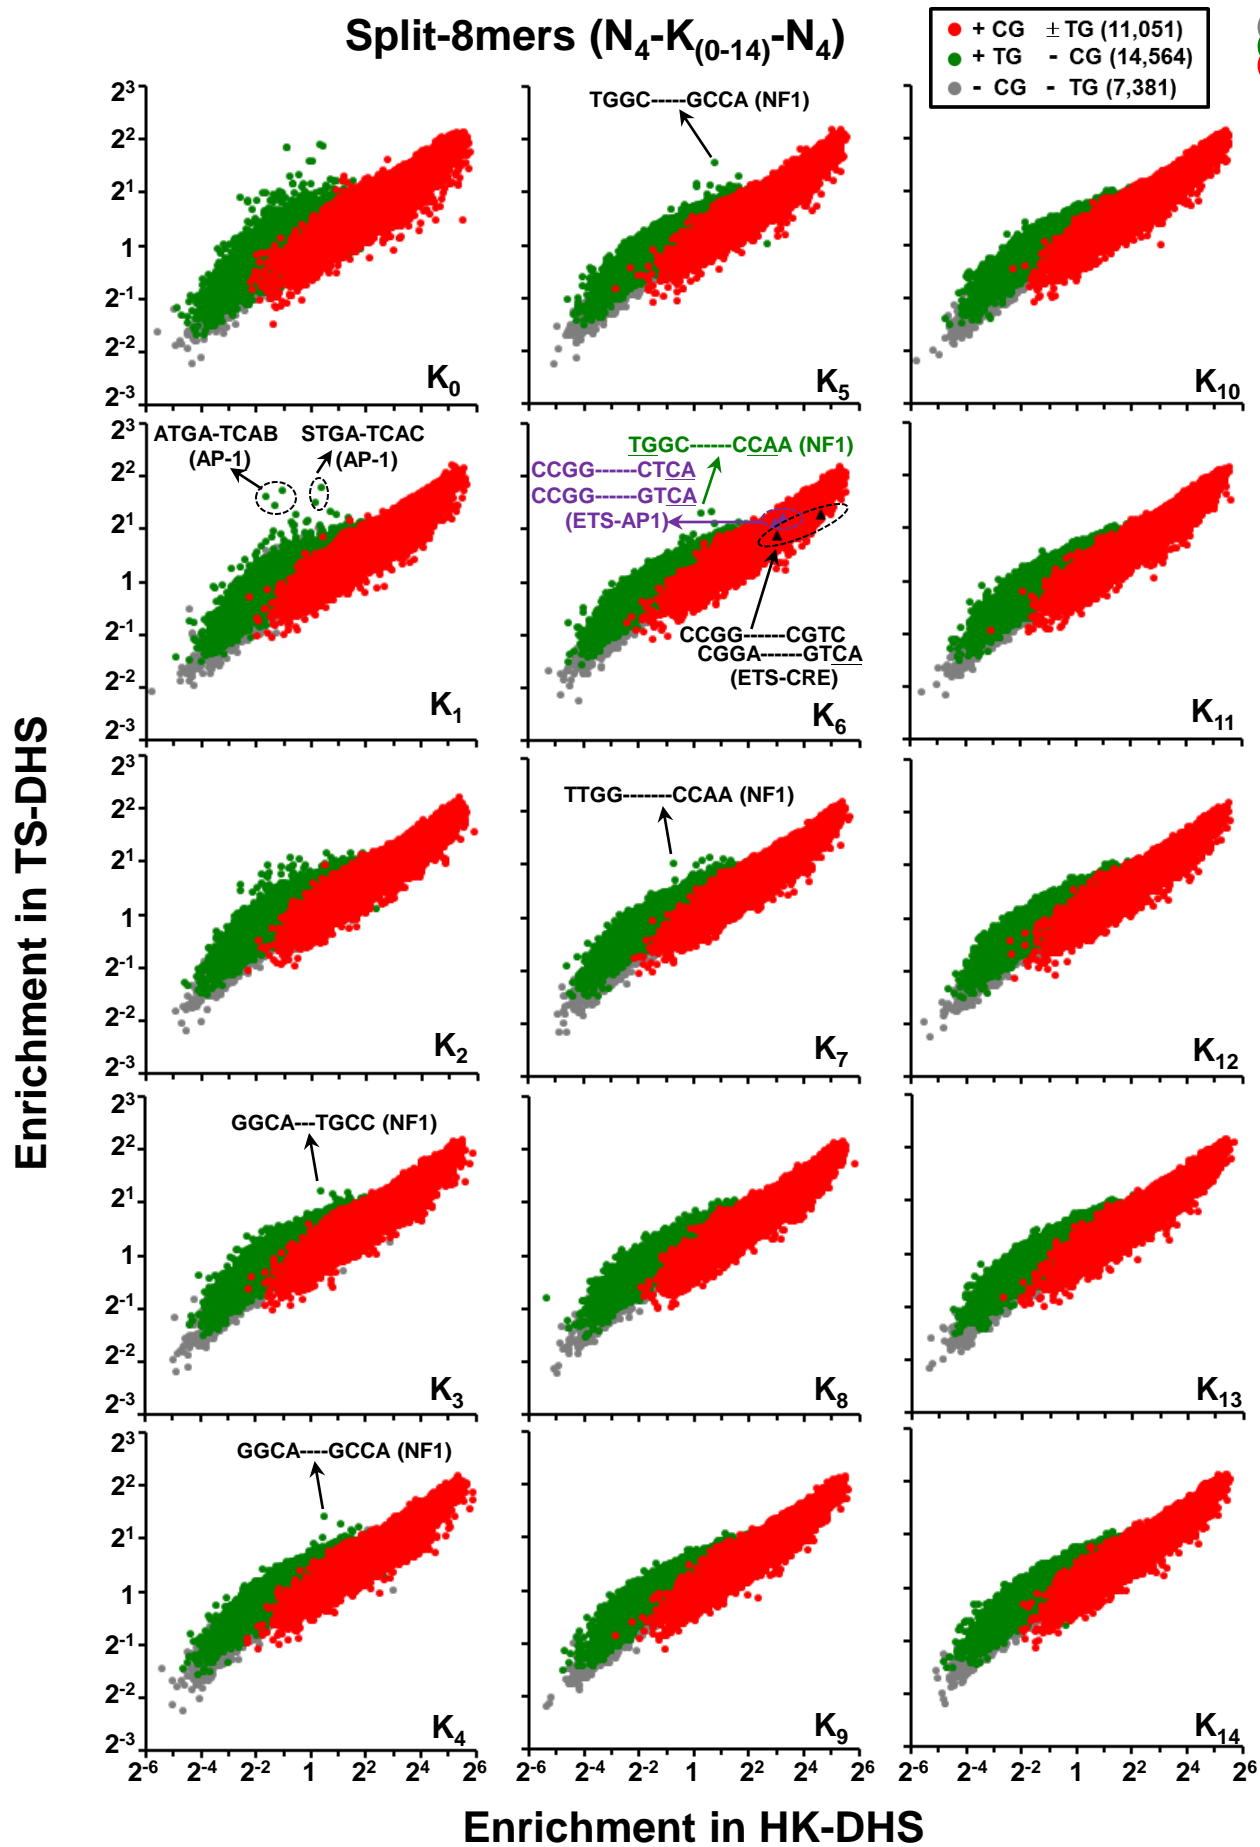

Figure S12. GR consensus motif is enriched in tissue specific DHSs in both Human and Mouse

GR-like split-8mers (N-NNN---NNN-N)

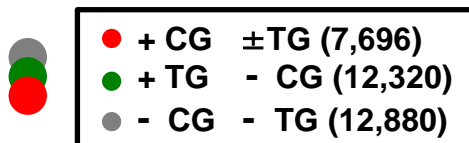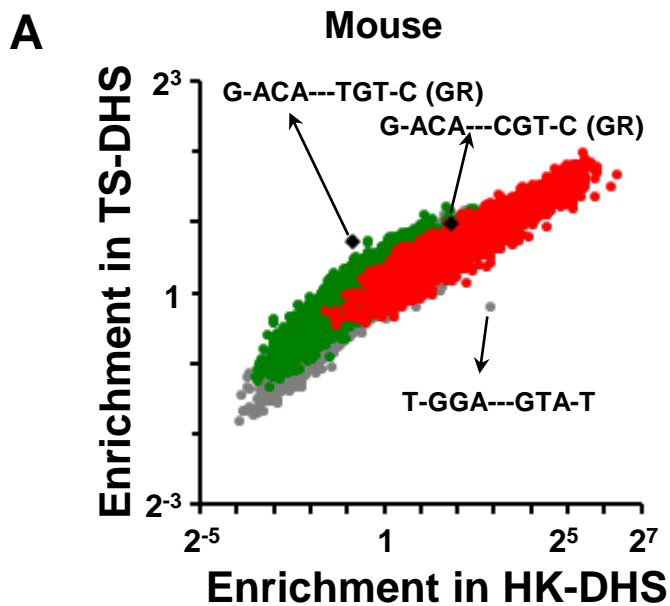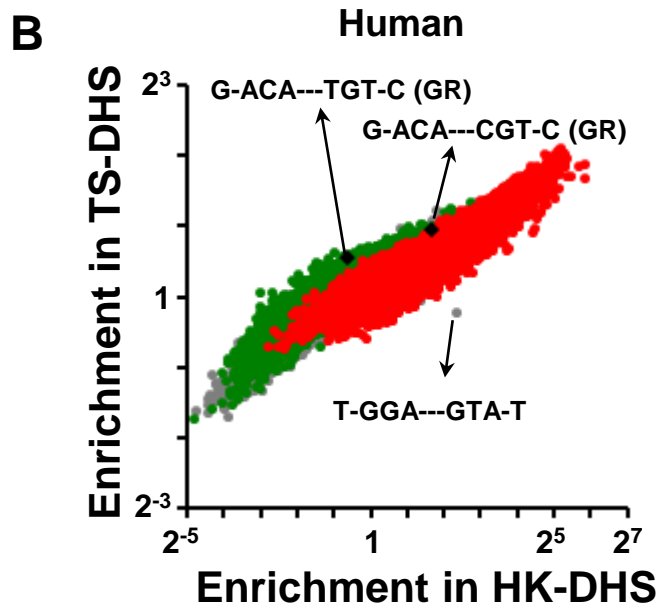

Figure S13.

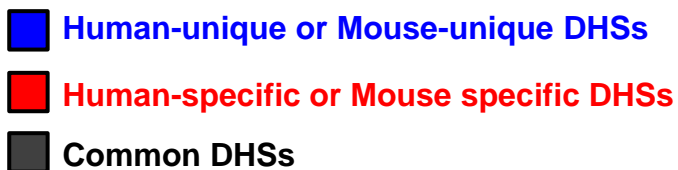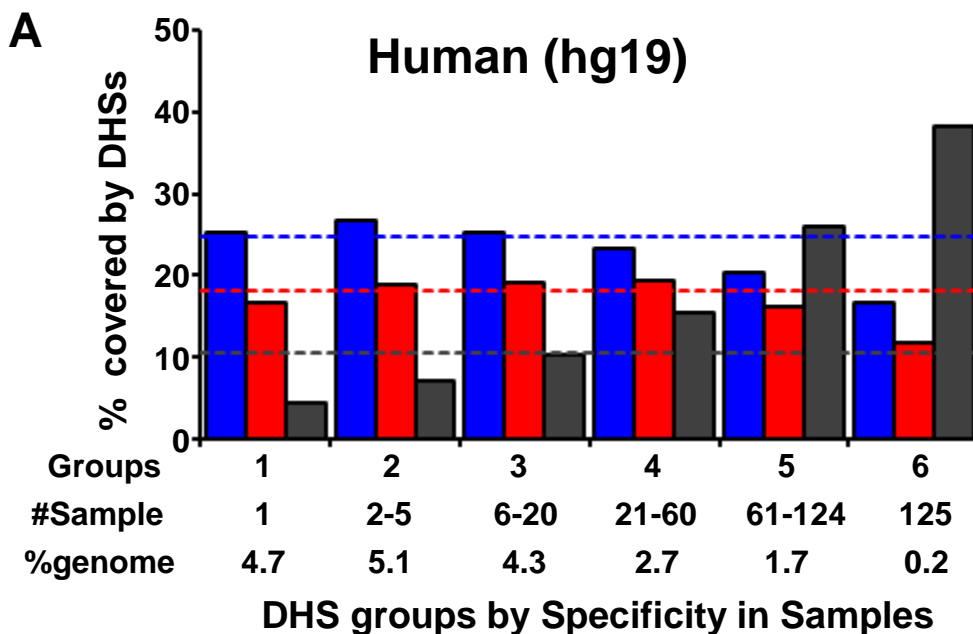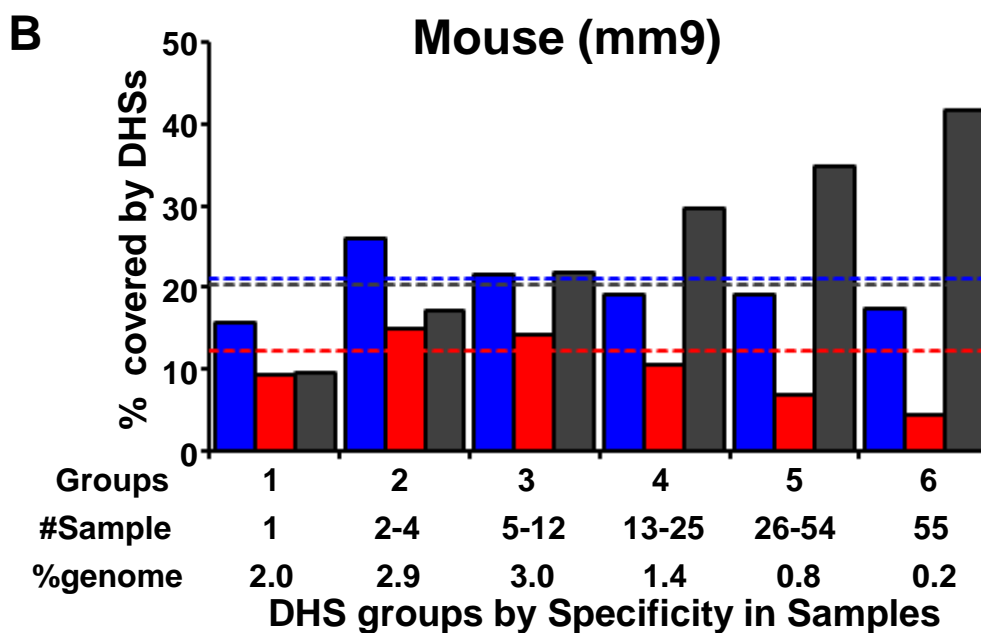

Figure S14. Enrichment of 8-mers in the overlap of human DHSs types by evolution and by specificity in cells

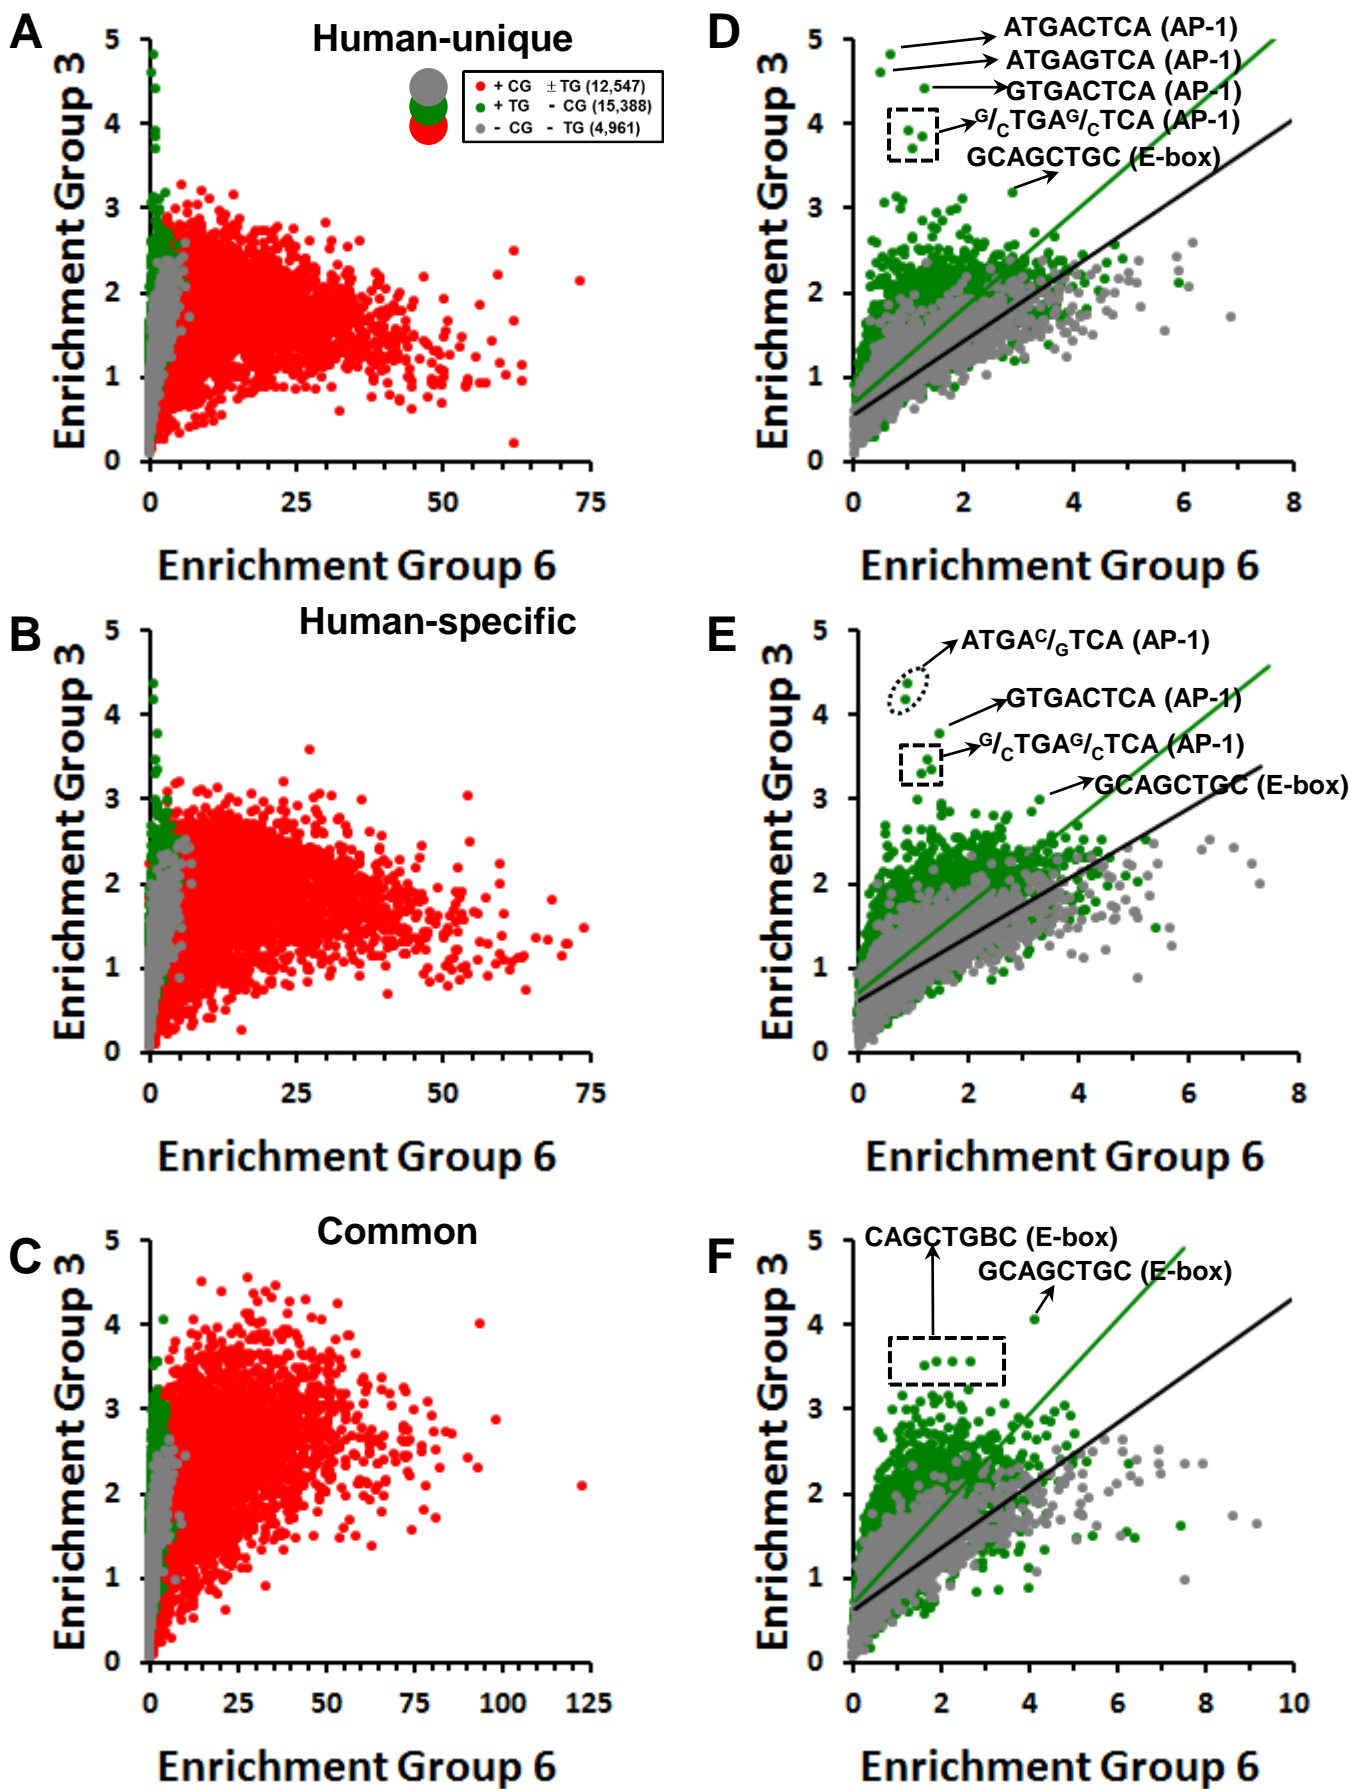

Figure S15. Enrichment of 8-mers in the overlap of mouse DHSs types by evolution and by cell specificity

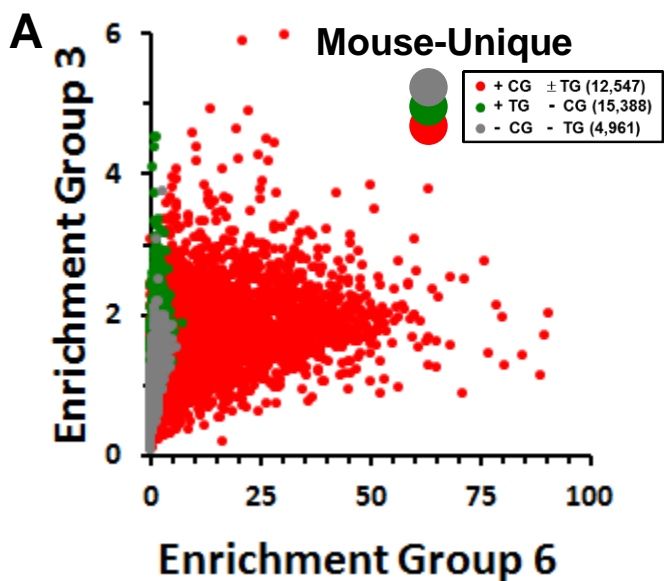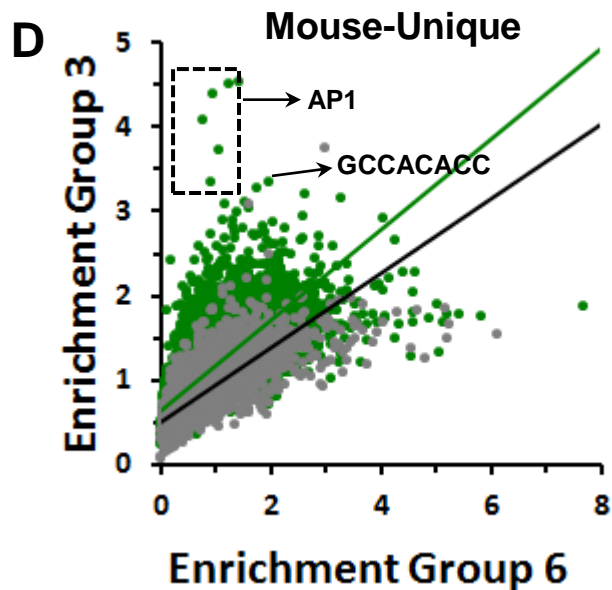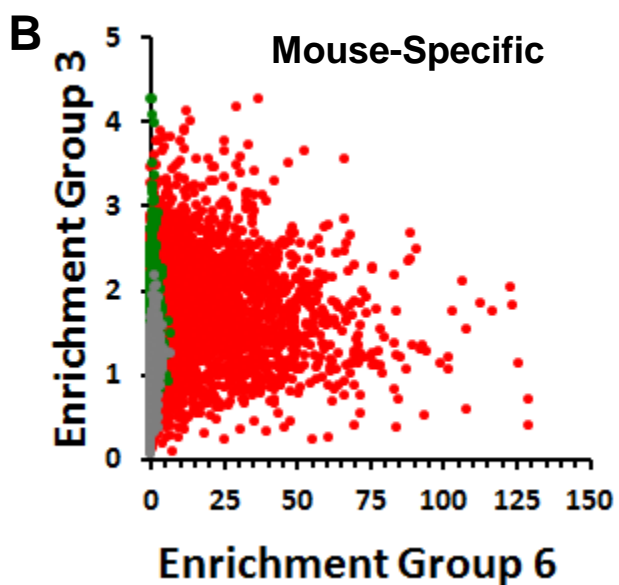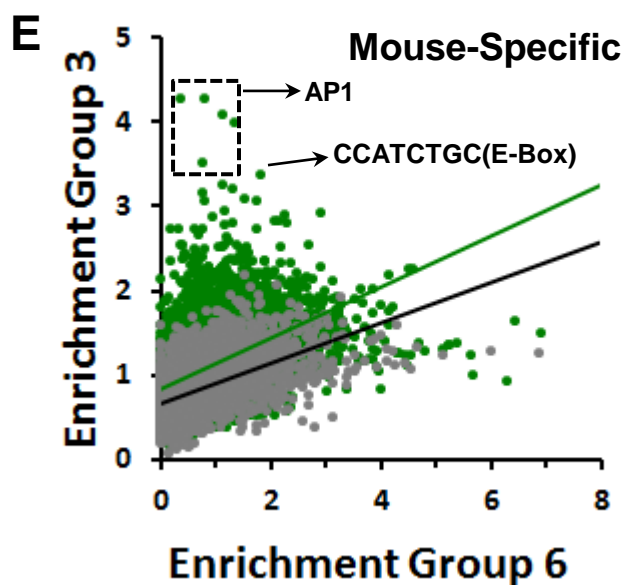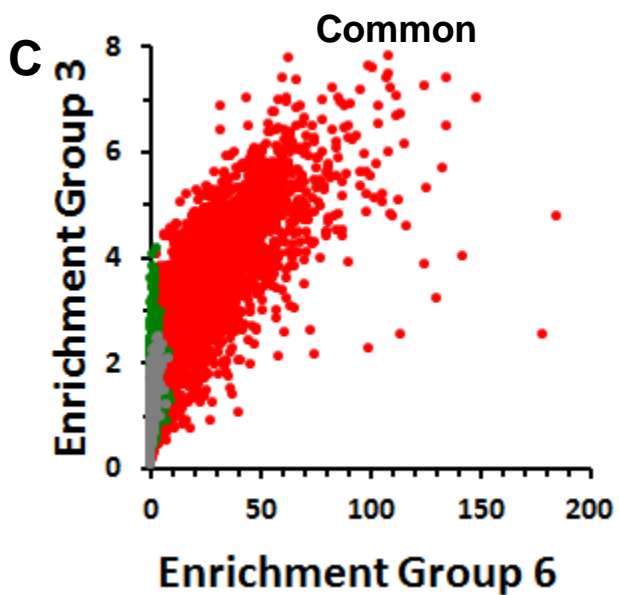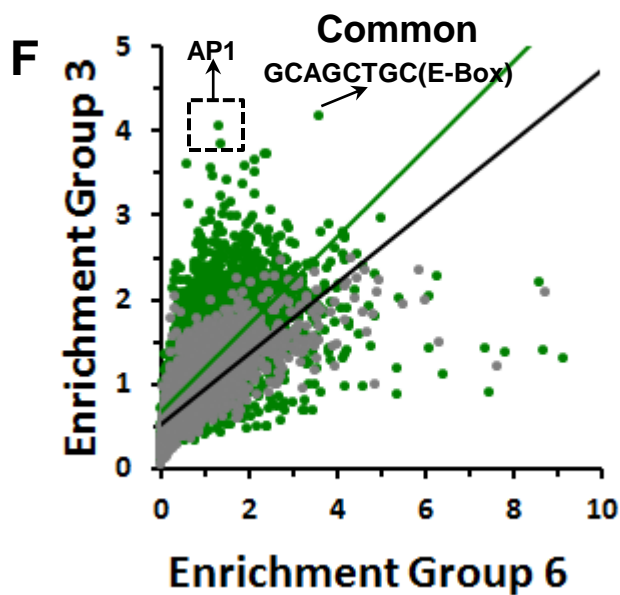

Figure S16. INOS around AP-1 motifs in human and mouse genomes

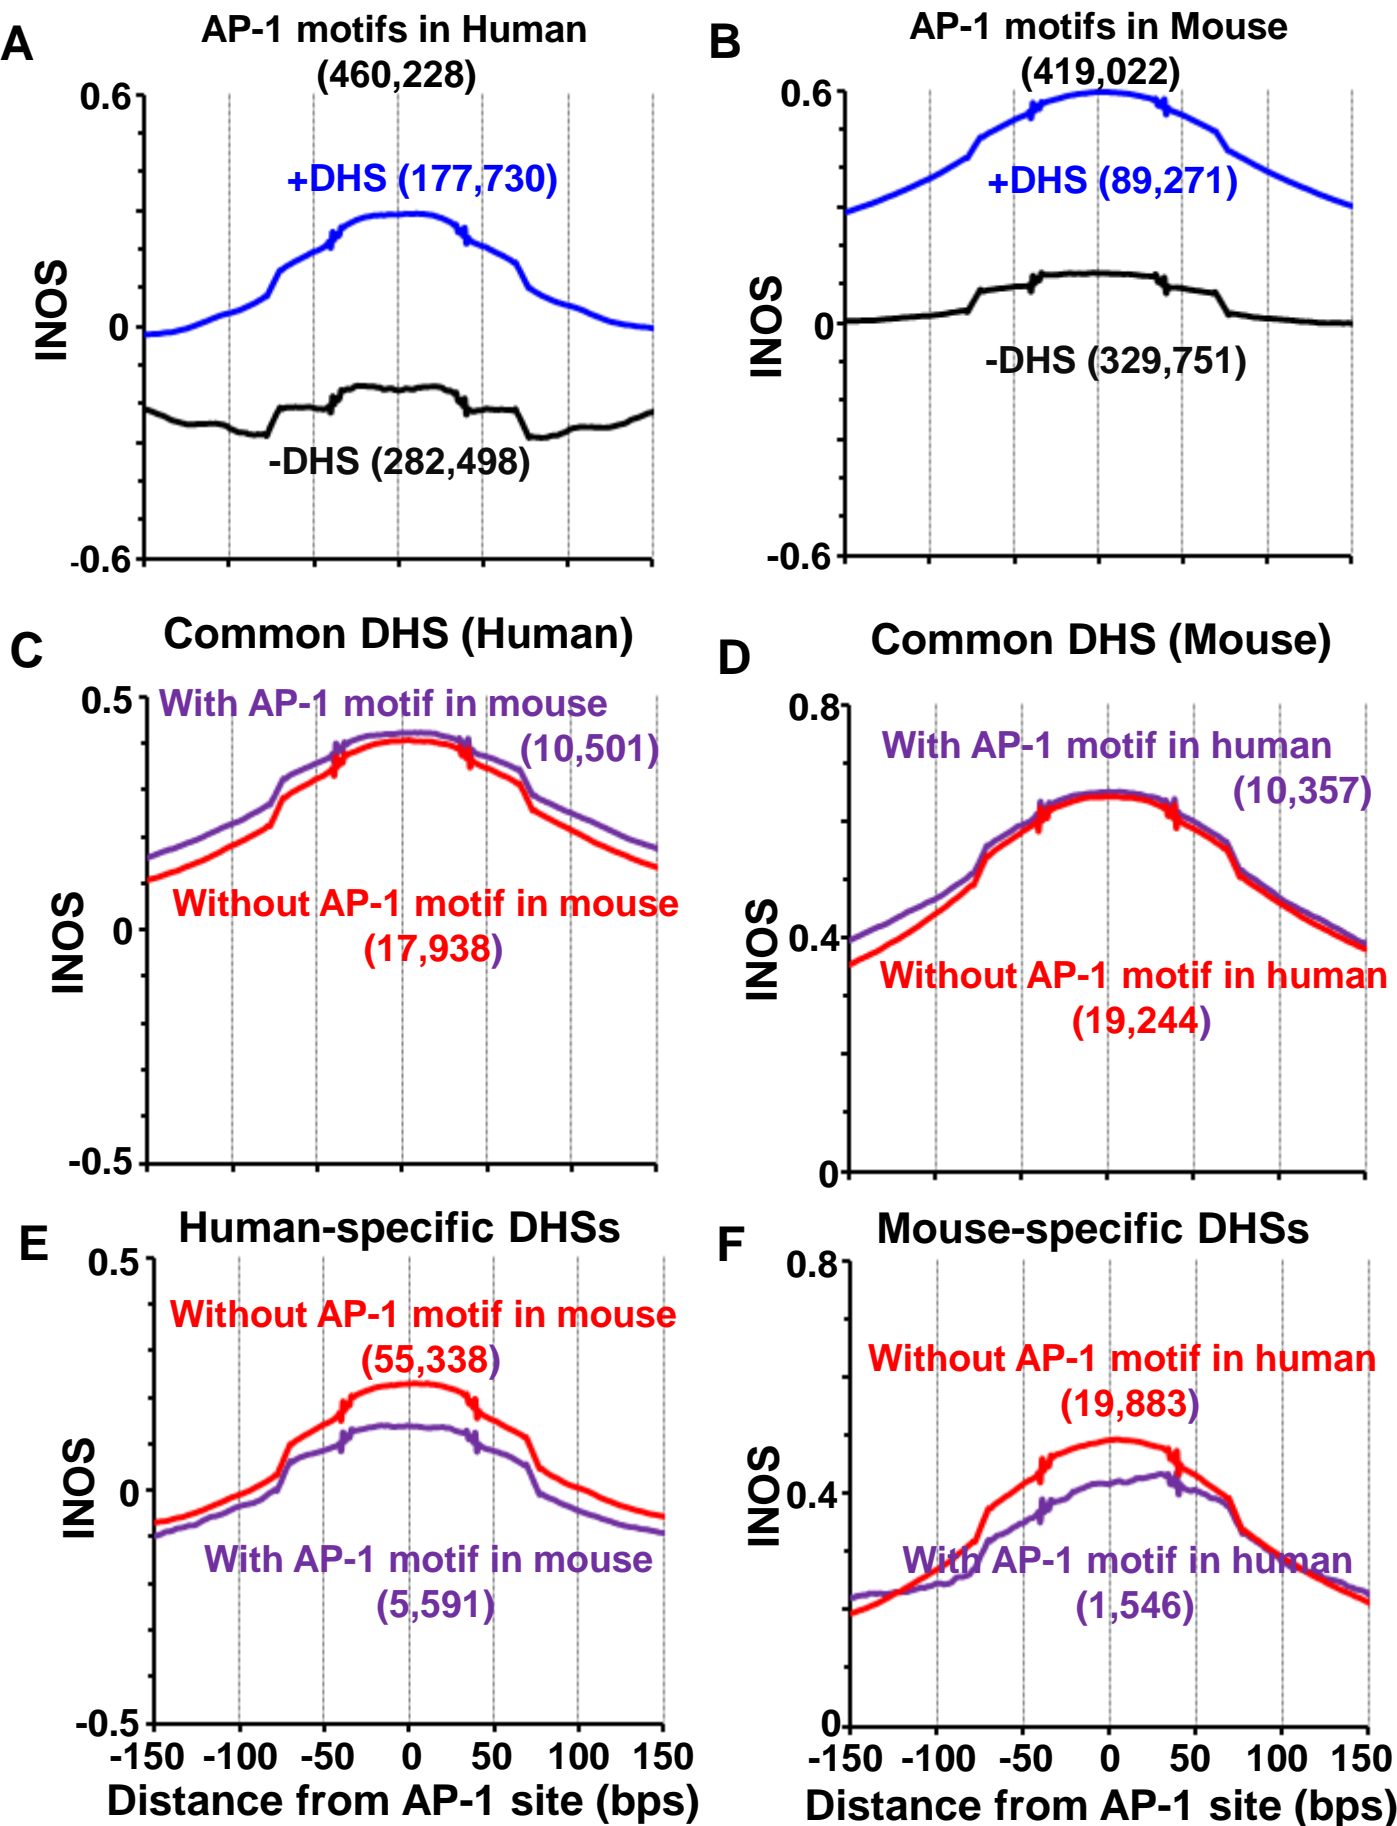

Table S1A. Occurrence of 8-mers in human genome (hg19)

| Type                     | # of 8-mers | hg19    |         |                |
|--------------------------|-------------|---------|---------|----------------|
|                          |             | mean    | SD      | median         |
| 4-CpGs                   | 1           | 8,749   | -       | 8,749          |
| 3-CpGs                   | 82          | 5,314   | 7,254   | 3,047          |
| 2-CpGs                   | 1,702       | 5,274   | 10,003  | 2,961          |
| 1-CpGs                   | 10,762      | 16,561  | 21,201  | 12,411         |
| <b>0-CpGs No CA TG</b>   | 4,961       | 139,309 | 187,376 | <b>96,700</b>  |
| <b>0-CpGs With CA TG</b> | 15,388      | 128,839 | 87,414  | <b>108,974</b> |
| 0-CpGs with 1 CA TG      | 9,844       | 129,290 | 92,529  | 106,215        |
| 0-CpGs with 2 CA TG      | 4,944       | 125,383 | 70,981  | 110,474        |
| 0-CpGs with 3 CA TG      | 592         | 147,268 | 97,781  | 130,663        |
| 0-CpGs with 4 CA TG      | 10          | 302,558 | 493,921 | 183,265        |
| <b>0-CpGs All</b>        | 20,349      | 131,392 | 119,820 | 106,864        |

Table S1B. Occurrence of 8-mers in mouse genome (mm9)

| Type                     | # of 8-mers | mm9     |           |         |
|--------------------------|-------------|---------|-----------|---------|
|                          |             | mean    | SD        | median  |
| 4-CpGs                   | 1           | 25,805  | -         | 25,805  |
| 3-CpGs                   | 82          | 3,869   | 5,000     | 1,827   |
| 2-CpGs                   | 1,702       | 3,134   | 3,007     | 2,307   |
| 1-CpGs                   | 10,762      | 12,793  | 7,403     | 11,108  |
| <b>0-CpGs No CA TG</b>   | 4,961       | 122,936 | 134,830   | 92,315  |
| <b>0-CpGs With CA TG</b> | 15,388      | 117,317 | 85,390    | 104,257 |
| 0-CpGs with 1 CA TG      | 9,844       | 115,657 | 63,165    | 100,985 |
| 0-CpGs with 2 CA TG      | 4,944       | 115,810 | 51,348    | 106,470 |
| 0-CpGs with 3 CA TG      | 592         | 146,927 | 224,763   | 124,061 |
| 0-CpGs with 4 CA TG      | 10          | 744,386 | 1,684,815 | 236,315 |
| <b>0-CpGs All</b>        | 20,349      | 118,687 | 99,754    | 102,034 |

Table S1C. Occurrence of 8-mers in simulated mouse genome with the same 2-mer frequency

| Type                     | # of 8-mers | mm9.2mer.simulated |        |         |
|--------------------------|-------------|--------------------|--------|---------|
|                          |             | mean               | SD     | median  |
| 4-CpGs                   | 1           | 9                  | -      | 9       |
| 3-CpGs                   | 82          | 168                | 38     | 177     |
| 2-CpGs                   | 1,702       | 1,512              | 372    | 1,498   |
| 1-CpGs                   | 10,762      | 13,347             | 3,892  | 12,901  |
| <b>0-CpGs No CA TG</b>   | 4,961       | 114,682            | 44,772 | 107,315 |
| <b>0-CpGs With CA TG</b> | 15,388      | 119,792            | 38,227 | 114,410 |
| 0-CpGs with 1 CA TG      | 9,844       | 120,040            | 40,878 | 113,302 |
| 0-CpGs with 2 CA TG      | 4,944       | 119,674            | 33,999 | 116,694 |
| 0-CpGs with 3 CA TG      | 592         | 117,166            | 22,711 | 119,834 |
| 0-CpGs with 4 CA TG      | 10          | 88,877             | 28,176 | 105,910 |
| <b>0-CpGs All</b>        | 20,349      | 118,546            | 39,981 | 112,486 |

**Table S2 The genome percentage of CNEs covered by DHSs (Specific for each lineage)**

| Referred Species | Total   |            |       | CNEs covered by DHSs |       |            |       | CNEs no DHSs |       |            |       |
|------------------|---------|------------|-------|----------------------|-------|------------|-------|--------------|-------|------------|-------|
|                  | #       | (bps)      | (%)   | #                    | %     | bps        | %     | #            | %     | bps        | %     |
| Sea urchin       | 19,384  | 1,498,590  | 0.05% | 5,146                | 26.5% | 488,000    | 0.02% | 14,238       | 73.5% | 1,010,590  | 0.03% |
| Stickleback      | 29,268  | 3,998,819  | 0.13% | 10,574               | 36.1% | 2,110,947  | 0.07% | 18,694       | 63.9% | 1,887,872  | 0.06% |
| Coelacanth       | 53,985  | 8,148,181  | 0.26% | 27,613               | 51.1% | 5,475,222  | 0.18% | 26,372       | 48.9% | 2,672,959  | 0.09% |
| Xenopus          | 44,200  | 6,161,506  | 0.20% | 17,638               | 39.9% | 3,178,145  | 0.10% | 26,562       | 60.1% | 2,983,361  | 0.10% |
| Chicken/Lizard   | 92,263  | 10,253,282 | 0.33% | 46,190               | 50.1% | 6,009,197  | 0.20% | 46,073       | 49.9% | 4,244,085  | 0.14% |
| Opossum          | 254,019 | 25,820,535 | 0.84% | 136,678              | 53.8% | 15,826,549 | 0.51% | 117,341      | 46.2% | 9,993,986  | 0.32% |
| Elephant         | 225,958 | 22,755,844 | 0.74% | 114,320              | 50.6% | 13,283,245 | 0.43% | 111,638      | 49.4% | 9,472,599  | 0.31% |
| Dog              | 29,755  | 2,965,269  | 0.10% | 12,986               | 43.6% | 1,468,401  | 0.05% | 16,769       | 56.4% | 1,496,868  | 0.05% |
| Mouse            | 10,149  | 931,843    | 0.03% | 5,062                | 49.9% | 505,467    | 0.02% | 5,087        | 50.1% | 426,376    | 0.01% |
| Human            | 739,597 | 81,035,297 | 2.63% | 371,061              | 50.2% | 47,857,173 | 1.55% | 368,536      | 49.8% | 33,178,106 | 1.08% |

| Referred Species | Total   |            |       | CNEs in DHSs and G+C% <= 42% |       |            |       | CNEs in DHSs and G+C% > 42% |       |            |       |
|------------------|---------|------------|-------|------------------------------|-------|------------|-------|-----------------------------|-------|------------|-------|
|                  | #       | (bps)      | (%)   | #                            | %     | bps        | %     | #                           | %     | bps        | %     |
| Sea urchin       | 19,384  | 1,498,590  | 0.05% | 4,035                        | 20.8% | 372,306    | 0.01% | 1,111                       | 5.7%  | 115,694    | 0.00% |
| Stickleback      | 29,268  | 3,998,819  | 0.13% | 4,310                        | 14.7% | 1,070,080  | 0.03% | 6,264                       | 21.4% | 1,040,867  | 0.03% |
| Coelacanth       | 53,985  | 8,148,181  | 0.26% | 17,374                       | 32.2% | 3,793,336  | 0.12% | 10,239                      | 19.0% | 1,681,886  | 0.05% |
| Xenopus          | 44,200  | 6,161,506  | 0.20% | 10,731                       | 24.3% | 2,031,331  | 0.07% | 6,907                       | 15.6% | 1,146,814  | 0.04% |
| Chicken/Lizard   | 92,263  | 10,253,282 | 0.33% | 33,081                       | 35.9% | 4,629,093  | 0.15% | 13,109                      | 14.2% | 1,380,104  | 0.04% |
| Opossum          | 254,019 | 25,820,535 | 0.84% | 93,643                       | 36.9% | 11,626,903 | 0.38% | 43,035                      | 16.9% | 4,199,646  | 0.14% |
| Elephant         | 225,958 | 22,755,844 | 0.74% | 75,361                       | 33.4% | 9,208,637  | 0.30% | 38,959                      | 17.2% | 4,074,608  | 0.13% |
| Dog              | 29,755  | 2,965,269  | 0.10% | 8,768                        | 29.5% | 1,041,380  | 0.03% | 4,218                       | 14.2% | 427,021    | 0.01% |
| Mouse            | 10,149  | 931,843    | 0.03% | 3,011                        | 29.7% | 308,071    | 0.01% | 2,051                       | 20.2% | 197,396    | 0.01% |
| Human            | 739,597 | 81,035,297 | 2.63% | 246,279                      | 33.3% | 33,708,831 | 1.09% | 124,782                     | 16.9% | 14,148,342 | 0.46% |

| Referred Species | Total   |            |       | CNEs no DHSs and G+C% < 42% |       |            |       | CNEs no DHSs and G+C% > 42% |       |           |       |
|------------------|---------|------------|-------|-----------------------------|-------|------------|-------|-----------------------------|-------|-----------|-------|
|                  | #       | (bps)      | (%)   | #                           | %     | bps        | %     | #                           | %     | bps       | %     |
| Sea urchin       | 19,384  | 1,498,590  | 0.05% | 5,146                       | 26.5% | 488,000    | 0.02% | 14,238                      | 73.5% | 1,010,590 | 0.03% |
| Stickleback      | 29,268  | 3,998,819  | 0.13% | 10,889                      | 37.2% | 1,038,322  | 0.03% | 7,805                       | 26.7% | 849,550   | 0.03% |
| Coelacanth       | 53,985  | 8,148,181  | 0.26% | 21,224                      | 39.3% | 2,162,601  | 0.07% | 5,148                       | 9.5%  | 510,358   | 0.02% |
| Xenopus          | 44,200  | 6,161,506  | 0.20% | 18,772                      | 42.5% | 1,928,453  | 0.06% | 7,790                       | 17.6% | 1,054,908 | 0.03% |
| Chicken/Lizard   | 92,263  | 10,253,282 | 0.33% | 39,986                      | 43.3% | 3,763,800  | 0.12% | 6,087                       | 6.6%  | 480,285   | 0.02% |
| Opossum          | 254,019 | 25,820,535 | 0.84% | 102,515                     | 40.4% | 8,935,679  | 0.29% | 14,826                      | 5.8%  | 1,058,307 | 0.03% |
| Elephant         | 225,958 | 22,755,844 | 0.74% | 97,499                      | 43.1% | 8,461,032  | 0.27% | 14,139                      | 6.3%  | 1,011,567 | 0.03% |
| Dog              | 29,755  | 2,965,269  | 0.10% | 14,841                      | 49.9% | 1,355,497  | 0.04% | 1,928                       | 6.5%  | 141,371   | 0.00% |
| Mouse            | 10,149  | 931,843    | 0.03% | 4,089                       | 40.3% | 356,276    | 0.01% | 998                         | 9.8%  | 70,100    | 0.00% |
| Human            | 739,597 | 81,035,297 | 2.63% | 309,815                     | 41.9% | 28,001,660 | 0.91% | 58,721                      | 7.9%  | 5,176,446 | 0.17% |



**Table S3. Description of 75 samples of human DHSs**

| Cells    | #Samples | Types                 | Notes                                                                                                                                                                                                |
|----------|----------|-----------------------|------------------------------------------------------------------------------------------------------------------------------------------------------------------------------------------------------|
| AG04449  | 2        | fibroblasts           | fetal buttock/thigh fibroblast                                                                                                                                                                       |
| AG04450  | 2        | fibroblasts           | fetal lung fibroblast                                                                                                                                                                                |
| AG09309  | 2        | fibroblasts           | adult toe fibroblast from apparently healthy 21 year old                                                                                                                                             |
| AG09319  | 2        | fibroblasts           | gum tissue fibroblasts from apparently healthy 24 year old                                                                                                                                           |
| AG10803  | 2        | fibroblasts           | abdominal skin fibroblasts from apparently healthy 22 year old                                                                                                                                       |
| BJ       | 2        | fibroblasts           | skin fibroblast, (PMID: 9916803)                                                                                                                                                                     |
| Caco2    | 2        | cancer cells          | colorectal adenocarcinoma. (PMID: 1939345)                                                                                                                                                           |
| CMK      | 1        | cancer cells          | acute megakaryocytic leukemia cells (PMID: 3016165)                                                                                                                                                  |
| GM06990  | 2        | B cells               | B-lymphocyte, lymphoblastoid, International HapMap Project, CEPH/Utah, treatment: Epstein-Barr Virus transformed                                                                                     |
| GM12865  | 2        | B cells               | B-lymphocyte, lymphoblastoid, International HapMap Project, CEPH/Utah, treatment: Epstein-Barr Virus transformed                                                                                     |
| GM12878  | 2        | B cells               | B-lymphocyte, lymphoblastoid, International HapMap Project, CEPH/Utah, treatment: Epstein-Barr Virus transformed                                                                                     |
| HAepiC   | 2        | epithelial cells      | amniotic epithelial cells                                                                                                                                                                            |
| HCF      | 2        | fibroblasts           | cardiac fibroblasts                                                                                                                                                                                  |
| HCM      | 2        | myocytes              | cardiac myocytes                                                                                                                                                                                     |
| HCPEpiC  | 2        | epithelial cells      | choroid plexus epithelial cells                                                                                                                                                                      |
| HEEpiC   | 2        | epithelial cells      | esophageal epithelial cells                                                                                                                                                                          |
| HeLaS3   | 2        | cancer cells          | cervical carcinoma                                                                                                                                                                                   |
| HepG2    | 2        | cancer cells          | hepatocellular carcinoma                                                                                                                                                                             |
| HGF      | 2        | fibroblasts           | gingival fibroblasts                                                                                                                                                                                 |
| HIPEpiC  | 2        | epithelial cells      | iris pigment epithelial cells                                                                                                                                                                        |
| HL60     | 2        | cancer cells          | promyelocytic leukemia cells, (PMID: 276884)                                                                                                                                                         |
| HMEC     | 1        | epithelial cells      | mammary epithelial cells                                                                                                                                                                             |
| HNPCEpiC | 2        | epithelial cells      | non-pigment ciliary epithelial cells                                                                                                                                                                 |
| HRCEpiC  | 2        | epithelial cells      | renal cortical epithelial cells                                                                                                                                                                      |
| HRE      | 2        | epithelial cells      | renal epithelial cells                                                                                                                                                                               |
| HRPEpiC  | 2        | epithelial cells      | retinal pigment epithelial cells                                                                                                                                                                     |
| HUVEC    | 1        | endothelial cells     | umbilical vein endothelial cells                                                                                                                                                                     |
| Jurkat   | 2        | cancer cells          | T lymphoblastoid derived from an acute T cell leukemia. (PMID: 68013)                                                                                                                                |
| Jurkat   | 1        | cancer cells          | T lymphoblastoid derived from an acute T cell leukemia. (PMID: 68013)                                                                                                                                |
| K562     | 2        | cancer cells          | leukemia, "The continuous cell line K-562 was established by Lozzio and Lozzio from the pleural effusion of a 53-year-old female with chronic myelogenous leukemia in terminal blast crises." - ATCC |
| MCF7     | 2        | cancer cells          | mammary gland, adenocarcinoma. (PMID: 4357757), newly promoted to tier 2: not in 2011 analysis                                                                                                       |
| NB4      | 2        | cancer cells          | acute promyelocytic leukemia cell line. (PMID: 1995093)                                                                                                                                              |
| NHDFneo  | 2        | fibroblasts           | neonatal dermal fibroblasts                                                                                                                                                                          |
| NHEK     | 1        | keratinocytes         | epidermal keratinocytes                                                                                                                                                                              |
| NHLF     | 2        | fibroblasts           | lung fibroblasts                                                                                                                                                                                     |
| PANC1    | 2        | cancer cells          | pancreatic carcinoma, (PMID: 1140870)                                                                                                                                                                |
| SAEC     | 2        | epithelial cells      | small airway epithelial cells                                                                                                                                                                        |
| SKMC     | 2        | skeletal muscle cells | skeletal muscle cells                                                                                                                                                                                |
| SKNSHRA  | 2        | cancer cells          | neuroblastoma cell line, treatment: differentiated with retinoic acid                                                                                                                                |
| Th1      | 1        | T cells               | primary Th1 T cells                                                                                                                                                                                  |
| Th2      | 1        | T cells               | primary Th2 T cells                                                                                                                                                                                  |

**Table S4. The most enriched TG-containing 8-mers in TS-DHSs in Human (Top 20)**

| 8mer     | Rvs_cmp_8mer | TFBSs | #in_Genome | %in_DHS_HK | %in_DHS_TS |
|----------|--------------|-------|------------|------------|------------|
| ATGACTCA | TGAGTCAT     | AP-1  | 109,976    | 0.1%       | 41.70%     |
| ATGAGTCA | TGACTCAT     | AP-1  | 112,487    | 0.1%       | 39.60%     |
| GTGACTCA | TGAGTCAC     | AP-1  | 108,976    | 0.3%       | 37.50%     |
| CTGAGTCA | TGACTCAG     | AP-1  | 127,041    | 0.2%       | 33.00%     |
| GTGAGTCA | TGACTCAC     | AP-1  | 115,946    | 0.2%       | 32.80%     |
| CTGACTCA | TGAGTCAG     | AP-1  | 124,674    | 0.2%       | 31.90%     |
| GAGTCATC | GATGACTC     | AP-1  | 61,429     | 0.2%       | 27.30%     |
| GACTCATC | GATGAGTC     | AP-1  | 52,483     | 0.1%       | 26.40%     |
| GAGTCAGC | GCTGACTC     | AP-1  | 67,729     | 0.4%       | 25.80%     |
| CATGACTC | GAGTCATG     | AP-1  | 73,203     | 0.2%       | 25.40%     |
| GACTCACC | GGTGAGTC     | AP-1  | 53,567     | 0.5%       | 25.30%     |
| GCAGCTGC | GCAGCTGC     | E-Box | 69,467     | 0.8%       | 25.10%     |
| CATGAGTC | GACTCATG     | AP-1  | 70,593     | 0.1%       | 24.70%     |
| GAGTCACC | GGTGACTC     | AP-1  | 70,528     | 0.4%       | 24.70%     |
| AGTGACTC | GAGTCACT     | AP-1  | 91,863     | 0.2%       | 24.10%     |
| GACTCAGC | GCTGAGTC     | AP-1  | 86,224     | 0.4%       | 23.70%     |
| AGGAAGTG | CACTTCCT     | ETS1  | 177,209    | 0.3%       | 23.10%     |
| GAGTCATA | TATGACTC     | AP-1  | 62,505     | 0.1%       | 23.10%     |
| AATGAGTC | GACTCATT     | AP-1  | 84,909     | 0.1%       | 22.90%     |
| AATGACTC | GAGTCATT     | AP-1  | 92,558     | 0.1%       | 22.50%     |

**Table S5. The outlier 8-mers in Figure 4B and their statistical significance**

| <b>8-mers</b> | <b>rMers</b> | <b>TFBS</b>      | <b>#in Genome</b> | <b>p.in.HK_DHS</b> | <b>p.in.TS_DHS</b> |
|---------------|--------------|------------------|-------------------|--------------------|--------------------|
| TGAGTCAA      | TTGACTCA     | AP-1             | 116,602           | 1.70E-18           | <1.0E-324          |
| TGACTCAA      | TTGAGTCA     | AP-1             | 104,754           | 1.50E-12           | <1.0E-324          |
| GTGACTCA      | TGAGTCAC     | AP-1             | 108,976           | 4.52E-08           | <1.0E-324          |
| ATGAGTCA      | TGACTCAT     | AP-1             | 112,487           | 1.69E-07           | <1.0E-324          |
| ATGACTCA      | TGAGTCAT     | AP-1             | 109,976           | 7.30E-07           | <1.0E-324          |
| GCAGCTGC      | GCAGCTGC     | E-Box            | 69,467            | 6.16E-244          | <1.0E-324          |
| TCGCGAGA      | TCTCGCGA     | E2F              | 2,252             | <1.0E-324          | 3.22E-90           |
| CGCATGCG      | CGCATGCG     | NRF1             | 3,172             | <1.0E-324          | 9.59E-228          |
| CTCGCGAG      | CTCGCGAG     | E2F              | 2,195             | <1.0E-324          | 3.99E-109          |
| GCCCCCCC      | GGGGGGGC     | unknown/SP-1/KLF | 31,007            | <1.0E-324          | <1.0E-324          |
| GATTGGCC      | GGCCAATC     | CCAAT            | 38,430            | <1.0E-324          | 3.30E-216          |
| GAGGGGGC      | GCCCCCTC     | unknown/SP-1/KLF | 84,959            | <1.0E-324          | <1.0E-324          |

**Table S6A The enrichment of E-Box motifs in human DHSs (TOP 20)**

| cells     | Enrichment | types                 | notes                                                                                                                                                                    |
|-----------|------------|-----------------------|--------------------------------------------------------------------------------------------------------------------------------------------------------------------------|
| HSMMtube  | 8.38       | myotubes              | skeletal muscle myotubes differentiated from the HSMM cell line                                                                                                          |
| HSMMemb   | 7.52       | myocytes              | embryonic myoblast                                                                                                                                                       |
| HSMM      | 6.59       | myocytes              | skeletal muscle myoblasts                                                                                                                                                |
| Caco2     | 6.59       | cancer cells          | colorectal adenocarcinoma. (PMID: 1939345)                                                                                                                               |
| SKNSHRA   | 5.98       | cancer cells          | neuroblastoma cell line, treatment: differentiated with retinoic acid                                                                                                    |
| iPS       | 5.91       | ESC                   | induced pluripotent stem cell derived from skin fibroblast                                                                                                               |
| SKMC      | 5.45       | skeletal muscle cells | skeletal muscle cells                                                                                                                                                    |
| BE2C      | 5.28       | cancer cells          | neuroblastoma, BE-C is a clone of the SK-N-BE neuroblastoma cell line (see ATCC CRL-2271)                                                                                |
| GM12891   | 4.99       | B cells               | B-lymphocyte, lymphoblastoid, International HapMap Project, CEPH/Utah, treatment: Epstein-Barr Virus transformed                                                         |
| GM12892   | 4.92       | B cells               | B-lymphocyte, lymphoblastoid, International HapMap Project, CEPH/Utah, treatment: Epstein-Barr Virus transformed                                                         |
| H1hESC    | 4.84       | ESC                   | embryonic stem cells                                                                                                                                                     |
| H9ES      | 4.62       | ESC                   | embryonic stem cell (hESC) H9                                                                                                                                            |
| 8988T     | 4.61       | cancer cells          | pancreas adenocarcinoma (PA-TU-8988T)                                                                                                                                    |
| CLL       | 4.58       | cancer cells          | chronic lymphocytic leukemia cell, T-cell lymphocyte                                                                                                                     |
| Urothelia | 4.52       | ureter cells          | primary ureter cell culture of urothelial cells derived from a 12 year-old girl and immortalized by transfection with a temperature-sensitive SV-40 large T antigen gene |
| GM19239   | 4.51       | B cells               | lymphoblastoid, International HapMap Project, Yoruba in Ibadan, Nigera, treatment: Epstein-Barr Virus transformed                                                        |
| GM19238   | 4.47       | B cells               | lymphoblastoid, International HapMap Project, Yoruba in Ibadan, Nigera, treatment: Epstein-Barr Virus transformed                                                        |
| HepG2     | 4.40       | cancer cells          | hepatocellular carcinoma                                                                                                                                                 |
| Jurkat    | 4.24       | cancer cells          | T lymphoblastoid derived from an acute T cell leukemia. (PMID: 68013)                                                                                                    |
| WERIRb1   | 4.20       | cancer cells          | retinoblastoma (PMID: 844036)                                                                                                                                            |

**Table S6B The enrichment of AP-1 motifs in human DHSs (TOP 20)**

| Cells         | Enrichment | Types                 | Notes                                                                        |
|---------------|------------|-----------------------|------------------------------------------------------------------------------|
| SAEC          | 15.53      | epithelial cells      | small airway epithelial cells                                                |
| PrEC          | 14.30      | epithelial cells      | prostate epithelial cell line                                                |
| HEEpiC        | 14.25      | epithelial cells      | esophageal epithelial cells                                                  |
| HBMEC         | 14.12      | endothelial cells     | brain microvascular endothelial cells                                        |
| HMF           | 13.99      | fibroblasts           | mammary fibroblasts                                                          |
| HRE           | 13.92      | epithelial cells      | renal epithelial cells                                                       |
| RWPE1         | 13.86      | epithelial cells      | prostate epithelial                                                          |
| HNPCEpiC      | 13.59      | epithelial cells      | non-pigment ciliary epithelial cells                                         |
| NHLF          | 13.57      | fibroblasts           | lung fibroblasts                                                             |
| WI38Tamoxifen | 13.42      | fibroblasts           | embryonic lung fibroblast cells, hTERT immortalized, includes Raf1 construct |
| NHA           | 13.35      | astrocytes            | astrocytes (also called Astrocy) [from brain]                                |
| HCFaa         | 13.16      | fibroblasts           | cardiac fibroblasts- adult atrial                                            |
| HIPEpiC       | 13.07      | epithelial cells      | iris pigment epithelial cells                                                |
| HRCEpiC       | 12.75      | epithelial cells      | renal cortical epithelial cells                                              |
| WI38          | 12.56      | fibroblasts           | embryonic lung fibroblast cells, hTERT immortalized, includes Raf1 construct |
| HCT116        | 12.47      | cancer cells          | colorectal carcinoma (PMID: 7214343)                                         |
| HPDE6E6E7     | 12.13      | pancreatic duct cells | pancreatic duct cells immortalized with E6E7 gene of HPV                     |
| RPTEC         | 11.67      | epithelial cells      | renal proximal tubule epithelial cells                                       |
| HMVECLBI      | 11.41      | endothelial cells     | blood microvascular endothelial cells, lung-derived                          |
| BJ            | 11.37      | fibroblasts           | skin fibroblast                                                              |

**Table S7. Statistics of the MRCA sequence to variations of 11mers with TGACTCA in CNEs with DHSs in human**

| The Most Recent Common Ancestor (MRCA) | Referred Species | Genome assembly | in CNEs and DHSs |         |          |          | in CNEs not in DHSs |         |          |          |
|----------------------------------------|------------------|-----------------|------------------|---------|----------|----------|---------------------|---------|----------|----------|
|                                        |                  |                 | #                | #≤1SNPs | #TGACTCA | %TGACTCA | #                   | #≤1SNPs | #TGACTCA | %TGACTCA |
| 01.Osteichthyes                        | Stickleback      | gasAcu1         | 313              | 95      | 39       | 12.5%    | 187                 | 31      | 13       | 7.0%     |
| 02.Sarcopterygii                       | Coelacanth       | latCha1         | 798              | 435     | 267      | 33.5%    | 186                 | 55      | 20       | 10.8%    |
| 03.Tetrapods                           | Xenopus          | xenTro3         | 1,090            | 415     | 252      | 23.1%    | 360                 | 67      | 23       | 6.4%     |
| 04.Amniotes                            | Chicken          | galGal3         | 2,384            | 1,374   | 896      | 37.6%    | 645                 | 280     | 116      | 18.0%    |
| 04.Amniotes                            | Lizard           | anoCar2         | 1,907            | 993     | 637      | 33.4%    | 557                 | 214     | 89       | 16.0%    |
| 05.Theria                              | Opossum          | monDom5         | 8,176            | 5,748   | 4,015    | 49.1%    | 2,128               | 1,138   | 618      | 29.0%    |
| 06.Eutheria                            | Elephant         | loxAfr3         | 13,130           | 11,741  | 9,083    | 69.2%    | 3,713               | 2,966   | 1,908    | 51.4%    |
| 07.Boreoeutheria                       | Dog              | canFam3         | 13,339           | 12,125  | 9,775    | 73.3%    | 3,764               | 3,090   | 2,032    | 54.0%    |
| 08.Euarchontoglires                    | Mouse            | mm9             | 11,657           | 9,566   | 7,109    | 61.0%    | 3,034               | 2,161   | 1,247    | 41.1%    |
| ALL                                    | Human            | hg19            | 14,691           |         |          |          | 4,626               |         |          |          |

| The Most Recent Common Ancestor (MRCA) | Referred Species | Genome assembly | not in CNEs |         |          |          | All     |                |               |          |
|----------------------------------------|------------------|-----------------|-------------|---------|----------|----------|---------|----------------|---------------|----------|
|                                        |                  |                 | #           | #≤1SNPs | #TGACTCA | %TGACTCA | #       | #≤1SNPs        | #TGACTCA      | %TGACTCA |
| 01.Osteichthyes                        | Stickleback      | gasAcu1         | 4,310       | 830     | 192      | 4.5%     | 4,810   | 956            | 244           | 5.1%     |
| 02.Sarcopterygii                       | Coelacanth       | latCha1         | 4,694       | 1,224   | 335      | 7.1%     | 5,678   | 1,714          | 622           | 11.0%    |
| 03.Tetrapods                           | Xenopus          | xenTro3         | 6,645       | 1,277   | 291      | 4.4%     | 8,095   | 1,759          | 566           | 7.0%     |
| 04.Amniotes                            | Chicken          | galGal3         | 8,268       | 1,981   | 697      | 8.4%     | 11,297  | 3,635          | 1,709         | 15.1%    |
| 04.Amniotes                            | Lizard           | anoCar2         | 7,946       | 1,811   | 556      | 7.0%     | 10,410  | 3,018          | 1,282         | 12.3%    |
| 05.Theria                              | Opossum          | monDom5         | 42,560      | 10,053  | 4,287    | 10.1%    | 52,864  | 16,939         | 8,920         | 16.9%    |
| 06.Eutheria                            | Elephant         | loxAfr3         | 191,040     | 95,610  | 41,821   | 21.9%    | 207,883 | <b>110,317</b> | <b>52,812</b> | 25.4%    |
| 07.Boreoeutheria                       | Dog              | canFam3         | 207,455     | 102,966 | 45,674   | 22.0%    | 224,558 | 118,181        | 57,481        | 25.6%    |
| 08.Euarchontoglires                    | Mouse            | mm9             | 125,928     | 45,561  | 19,025   | 15.1%    | 140,619 | 57,288         | 27,381        | 19.5%    |
| ALL                                    | Human            | hg19            | 440,911     |         |          |          | 460,228 |                |               |          |

**Table S8A1. Statistics of the MRCA sequence (01. Ost. Stackleback) to variations of 11mers with TGACTCA (in CNEs and in DHSs)**

| Total             | Position  | 1     | 2     | 3            | 4            | 5     | 6      | 7     | 8            | 9            | 10    | 11    |
|-------------------|-----------|-------|-------|--------------|--------------|-------|--------|-------|--------------|--------------|-------|-------|
| 95                | Consensus | N     | N     | T            | G            | A     | C      | T     | C            | A            | N     | N     |
| #                 | A         | 26    | 32    | 4            | 2            | 88    | 0      | 1     | 1            | 79           | 26    | 19    |
|                   | C         | 24    | 23    | 7            | 1            | 1     | 95     | 2     | 87           | 6            | 15    | 28    |
|                   | G         | 23    | 21    | 3            | 90           | 5     | 0      | 3     | 3            | 6            | 21    | 15    |
|                   | T         | 22    | 19    | 81           | 2            | 1     | 0      | 89    | 4            | 4            | 33    | 33    |
| %                 | A         | 27.4% | 33.7% | 4.2%         | 2.1%         | 92.6% | 0.0%   | 1.1%  | 1.1%         | 83.2%        | 27.4% | 20.0% |
|                   | C         | 25.3% | 24.2% | 7.4%         | 1.1%         | 1.1%  | 100.0% | 2.1%  | 91.6%        | 6.3%         | 15.8% | 29.5% |
|                   | G         | 24.2% | 22.1% | 3.2%         | 94.7%        | 5.3%  | 0.0%   | 3.2%  | 3.2%         | 6.3%         | 22.1% | 15.8% |
|                   | T         | 23.2% | 20.0% | 85.3%        | 2.1%         | 1.1%  | 0.0%   | 93.7% | 4.2%         | 4.2%         | 34.7% | 34.7% |
| <b>Conserved</b>  |           |       |       |              |              |       |        |       |              |              |       |       |
| #                 |           | 0     | 0     | 81           | 90           | 88    | 95     | 89    | 87           | 79           | 0     | 0     |
| %                 |           | 0.0%  | 0.0%  | 85.3%        | 94.7%        | 92.6% | 100.0% | 93.7% | 91.6%        | 83.2%        | 0.0%  | 0.0%  |
| <b>Variations</b> |           |       |       |              |              |       |        |       |              |              |       |       |
| %                 | A         | 27.4% | 33.7% | 28.6%        | <b>40.0%</b> | 0.0%  | 0.0%   | 16.7% | 12.5%        | 0.0%         | 27.4% | 20.0% |
|                   | C         | 25.3% | 24.2% | <b>50.0%</b> | 20.0%        | 14.3% | 0.0%   | 33.3% | 0.0%         | 37.5%        | 15.8% | 29.5% |
|                   | G         | 24.2% | 22.1% | 21.4%        | 0.0%         | 71.4% | 0.0%   | 50.0% | 37.5%        | <b>37.5%</b> | 22.1% | 15.8% |
|                   | T         | 23.2% | 20.0% | 0.0%         | 40.0%        | 14.3% | 0.0%   | 0.0%  | <b>50.0%</b> | 25.0%        | 34.7% | 34.7% |

**Table S8A2. Statistics of the MRCA sequence (01. Ost. Stackleback) to variations of 11mers with TGACTCA (in CNEs and no DHSs)**

| Total             | Position  | 1     | 2     | 3           | 4           | 5     | 6      | 7     | 8           | 9           | 10    | 11    |
|-------------------|-----------|-------|-------|-------------|-------------|-------|--------|-------|-------------|-------------|-------|-------|
| 31                | Consensus | N     | N     | T           | G           | A     | C      | T     | C           | A           | N     | N     |
| #                 | A         | 2     | 6     | 1           | 0           | 29    | 0      | 1     | 1           | 28          | 5     | 3     |
|                   | C         | 13    | 11    | 0           | 0           | 1     | 31     | 4     | 29          | 3           | 4     | 4     |
|                   | G         | 13    | 4     | 1           | 31          | 1     | 0      | 4     | 1           | 0           | 19    | 14    |
|                   | T         | 3     | 10    | 29          | 0           | 0     | 0      | 22    | 0           | 0           | 3     | 10    |
| %                 | A         | 6.5%  | 19.4% | 3.2%        | 0.0%        | 93.5% | 0.0%   | 3.2%  | 3.2%        | 90.3%       | 16.1% | 9.7%  |
|                   | C         | 41.9% | 35.5% | 0.0%        | 0.0%        | 3.2%  | 100.0% | 12.9% | 93.5%       | 9.7%        | 12.9% | 12.9% |
|                   | G         | 41.9% | 12.9% | 3.2%        | 100.0%      | 3.2%  | 0.0%   | 12.9% | 3.2%        | 0.0%        | 61.3% | 45.2% |
|                   | T         | 9.7%  | 32.3% | 93.5%       | 0.0%        | 0.0%  | 0.0%   | 71.0% | 0.0%        | 0.0%        | 9.7%  | 32.3% |
| <b>Conserved</b>  |           |       |       |             |             |       |        |       |             |             |       |       |
| #                 |           | 0     | 0     | 29          | 31          | 29    | 31     | 22    | 29          | 28          | 0     | 0     |
| %                 |           | 0.0%  | 0.0%  | 93.5%       | 100.0%      | 93.5% | 100.0% | 71.0% | 93.5%       | 90.3%       | 0.0%  | 0.0%  |
| <b>Variations</b> |           |       |       |             |             |       |        |       |             |             |       |       |
| %                 | A         | 6.5%  | 19.4% | 50.0%       | <b>0.0%</b> | 0.0%  | 0.0%   | 11.1% | 50.0%       | 0.0%        | 16.1% | 9.7%  |
|                   | C         | 41.9% | 35.5% | <b>0.0%</b> | 0.0%        | 50.0% | 0.0%   | 44.4% | 0.0%        | 100.0%      | 12.9% | 12.9% |
|                   | G         | 41.9% | 12.9% | 50.0%       | 0.0%        | 50.0% | 0.0%   | 44.4% | 50.0%       | <b>0.0%</b> | 61.3% | 45.2% |
|                   | T         | 9.7%  | 32.3% | 0.0%        | 0.0%        | 0.0%  | 0.0%   | 0.0%  | <b>0.0%</b> | 0.0%        | 9.7%  | 32.3% |

**Table S8A3. Statistics of the MRCA sequence (01. Ost. Stackleback) to variations of 11mers with TGACTCA (no CNEs)**

| Total             | Position  | 1     | 2     | 3            | 4            | 5     | 6     | 7     | 8            | 9            | 10    | 11    |
|-------------------|-----------|-------|-------|--------------|--------------|-------|-------|-------|--------------|--------------|-------|-------|
| 830               | Consensus | N     | N     | T            | G            | A     | C     | T     | C            | A            | N     | N     |
| #                 | A         | 161   | 195   | 31           | 13           | 729   | 12    | 35    | 12           | 720          | 115   | 217   |
|                   | C         | 209   | 278   | 34           | 35           | 7     | 802   | 122   | 782          | 48           | 225   | 233   |
|                   | G         | 263   | 218   | 30           | 767          | 78    | 0     | 36    | 24           | 37           | 319   | 205   |
|                   | T         | 197   | 139   | 735          | 15           | 16    | 16    | 637   | 12           | 25           | 171   | 175   |
| %                 | A         | 19.4% | 23.5% | 3.7%         | 1.6%         | 87.8% | 1.4%  | 4.2%  | 1.4%         | 86.7%        | 13.9% | 26.1% |
|                   | C         | 25.2% | 33.5% | 4.1%         | 4.2%         | 0.8%  | 96.6% | 14.7% | 94.2%        | 5.8%         | 27.1% | 28.1% |
|                   | G         | 31.7% | 26.3% | 3.6%         | 92.4%        | 9.4%  | 0.0%  | 4.3%  | 2.9%         | 4.5%         | 38.4% | 24.7% |
|                   | T         | 23.7% | 16.7% | 88.6%        | 1.8%         | 1.9%  | 1.9%  | 76.7% | 1.4%         | 3.0%         | 20.6% | 21.1% |
| <b>Conserved</b>  |           |       |       |              |              |       |       |       |              |              |       |       |
| #                 |           | 0     | 0     | 735          | 767          | 729   | 802   | 637   | 782          | 720          | 0     | 0     |
| %                 |           | 0.0%  | 0.0%  | 88.6%        | 92.4%        | 87.8% | 96.6% | 76.7% | 94.2%        | 86.7%        | 0.0%  | 0.0%  |
| <b>Variations</b> |           |       |       |              |              |       |       |       |              |              |       |       |
| %                 | A         | 19.4% | 23.5% | 32.6%        | <b>20.6%</b> | 0.0%  | 42.9% | 18.1% | 25.0%        | 0.0%         | 13.9% | 26.1% |
|                   | C         | 25.2% | 33.5% | <b>35.8%</b> | 55.6%        | 6.9%  | 0.0%  | 63.2% | 0.0%         | 43.6%        | 27.1% | 28.1% |
|                   | G         | 31.7% | 26.3% | 31.6%        | 0.0%         | 77.2% | 0.0%  | 18.7% | 50.0%        | <b>33.6%</b> | 38.4% | 24.7% |
|                   | T         | 23.7% | 16.7% | 0.0%         | 23.8%        | 15.8% | 57.1% | 0.0%  | <b>25.0%</b> | 22.7%        | 20.6% | 21.1% |

**Table S8B1. Statistics of the MRCA sequence (02. Sar. Coelacanth) to variations of 11mers with TGACTCA (in CNEs and in DHSs)**

| Total             | Position  | 1     | 2     | 3            | 4            | 5     | 6     | 7     | 8            | 9            | 10    | 11    |
|-------------------|-----------|-------|-------|--------------|--------------|-------|-------|-------|--------------|--------------|-------|-------|
| 435               | Consensus | N     | N     | T            | G            | A     | C     | T     | C            | A            | N     | N     |
| #                 | A         | 138   | 151   | 5            | 5            | 407   | 20    | 4     | 13           | 407          | 97    | 118   |
|                   | C         | 69    | 91    | 9            | 2            | 3     | 395   | 11    | 407          | 7            | 77    | 81    |
|                   | G         | 95    | 110   | 1            | 423          | 21    | 0     | 2     | 6            | 7            | 104   | 61    |
|                   | T         | 133   | 83    | 420          | 5            | 4     | 20    | 418   | 9            | 14           | 157   | 175   |
| %                 | A         | 31.7% | 34.7% | 1.1%         | 1.1%         | 93.6% | 4.6%  | 0.9%  | 3.0%         | 93.6%        | 22.3% | 27.1% |
|                   | C         | 15.9% | 20.9% | 2.1%         | 0.5%         | 0.7%  | 90.8% | 2.5%  | 93.6%        | 1.6%         | 17.7% | 18.6% |
|                   | G         | 21.8% | 25.3% | 0.2%         | 97.2%        | 4.8%  | 0.0%  | 0.5%  | 1.4%         | 1.6%         | 23.9% | 14.0% |
|                   | T         | 30.6% | 19.1% | 96.6%        | 1.1%         | 0.9%  | 4.6%  | 96.1% | 2.1%         | 3.2%         | 36.1% | 40.2% |
| <b>Conserved</b>  |           |       |       |              |              |       |       |       |              |              |       |       |
| #                 |           | 0     | 0     | 420          | 423          | 407   | 395   | 418   | 407          | 407          | 0     | 0     |
| %                 |           | 0.0%  | 0.0%  | 96.6%        | 97.2%        | 93.6% | 90.8% | 96.1% | 93.6%        | 93.6%        | 0.0%  | 0.0%  |
| <b>Variations</b> |           |       |       |              |              |       |       |       |              |              |       |       |
| %                 | A         | 31.7% | 34.7% | 33.3%        | <b>41.7%</b> | 0.0%  | 50.0% | 23.5% | 46.4%        | 0.0%         | 22.3% | 27.1% |
|                   | C         | 15.9% | 20.9% | <b>60.0%</b> | 16.7%        | 10.7% | 0.0%  | 64.7% | 0.0%         | 25.0%        | 17.7% | 18.6% |
|                   | G         | 21.8% | 25.3% | 6.7%         | 0.0%         | 75.0% | 0.0%  | 11.8% | 21.4%        | <b>25.0%</b> | 23.9% | 14.0% |
|                   | T         | 30.6% | 19.1% | 0.0%         | 41.7%        | 14.3% | 50.0% | 0.0%  | <b>32.1%</b> | 50.0%        | 36.1% | 40.2% |

**Table S8B2. Statistics of the MRCA sequence (02. Sar. Coelacanth) to variations of 11mers with TGACTCA (in CNEs and no DHSs)**

| Total             | Position  | 1     | 2     | 3             | 4             | 5     | 6      | 7     | 8            | 9            | 10    | 11    |
|-------------------|-----------|-------|-------|---------------|---------------|-------|--------|-------|--------------|--------------|-------|-------|
| 55                | Consensus | N     | N     | T             | G             | A     | C      | T     | C            | A            | N     | N     |
| #                 | A         | 22    | 19    | 0             | 5             | 50    | 2      | 0     | 5            | 51           | 14    | 12    |
|                   | C         | 9     | 9     | 2             | 0             | 2     | 53     | 3     | 45           | 0            | 17    | 9     |
|                   | G         | 4     | 11    | 0             | 50            | 2     | 0      | 4     | 1            | 2            | 10    | 9     |
|                   | T         | 20    | 16    | 53            | 0             | 1     | 0      | 48    | 4            | 2            | 14    | 25    |
| %                 | A         | 40.0% | 34.5% | 0.0%          | 9.1%          | 90.9% | 3.6%   | 0.0%  | 9.1%         | 92.7%        | 25.5% | 21.8% |
|                   | C         | 16.4% | 16.4% | 3.6%          | 0.0%          | 3.6%  | 96.4%  | 5.5%  | 81.8%        | 0.0%         | 30.9% | 16.4% |
|                   | G         | 7.3%  | 20.0% | 0.0%          | 90.9%         | 3.6%  | 0.0%   | 7.3%  | 1.8%         | 3.6%         | 18.2% | 16.4% |
|                   | T         | 36.4% | 29.1% | 96.4%         | 0.0%          | 1.8%  | 0.0%   | 87.3% | 7.3%         | 3.6%         | 25.5% | 45.5% |
| <b>Conserved</b>  |           |       |       |               |               |       |        |       |              |              |       |       |
| #                 |           | 0     | 0     | 53            | 50            | 50    | 53     | 48    | 45           | 51           | 0     | 0     |
| %                 |           | 0.0%  | 0.0%  | 96.4%         | 90.9%         | 90.9% | 96.4%  | 87.3% | 81.8%        | 92.7%        | 0.0%  | 0.0%  |
| <b>Variations</b> |           |       |       |               |               |       |        |       |              |              |       |       |
| %                 | A         | 40.0% | 34.5% | 0.0%          | <b>100.0%</b> | 0.0%  | 100.0% | 0.0%  | 50.0%        | 0.0%         | 25.5% | 21.8% |
|                   | C         | 16.4% | 16.4% | <b>100.0%</b> | 0.0%          | 40.0% | 0.0%   | 42.9% | 0.0%         | 0.0%         | 30.9% | 16.4% |
|                   | G         | 7.3%  | 20.0% | 0.0%          | 0.0%          | 40.0% | 0.0%   | 57.1% | 10.0%        | <b>50.0%</b> | 18.2% | 16.4% |
|                   | T         | 36.4% | 29.1% | 0.0%          | 0.0%          | 20.0% | 0.0%   | 0.0%  | <b>40.0%</b> | 50.0%        | 25.5% | 45.5% |

**Table S8B3. Statistics of the MRCA sequence (02. Sar. Coelacanth) to variations of 11mers with TGACTCA (no CNEs)**

| Total             | Position  | 1     | 2     | 3            | 4            | 5     | 6     | 7     | 8            | 9            | 10    | 11    |
|-------------------|-----------|-------|-------|--------------|--------------|-------|-------|-------|--------------|--------------|-------|-------|
| 1224              | Consensus | N     | N     | T            | G            | A     | C     | T     | C            | A            | N     | N     |
| #                 | A         | 304   | 356   | 56           | 23           | 1100  | 59    | 72    | 28           | 1064         | 251   | 366   |
|                   | C         | 265   | 384   | 23           | 23           | 17    | 1099  | 108   | 1133         | 58           | 241   | 293   |
|                   | G         | 343   | 255   | 31           | 1152         | 84    | 0     | 27    | 33           | 35           | 451   | 281   |
|                   | T         | 312   | 229   | 1114         | 26           | 23    | 66    | 1017  | 30           | 67           | 281   | 284   |
| %                 | A         | 24.8% | 29.1% | 4.6%         | 1.9%         | 89.9% | 4.8%  | 5.9%  | 2.3%         | 86.9%        | 20.5% | 29.9% |
|                   | C         | 21.7% | 31.4% | 1.9%         | 1.9%         | 1.4%  | 89.8% | 8.8%  | 92.6%        | 4.7%         | 19.7% | 23.9% |
|                   | G         | 28.0% | 20.8% | 2.5%         | 94.1%        | 6.9%  | 0.0%  | 2.2%  | 2.7%         | 2.9%         | 36.8% | 23.0% |
|                   | T         | 25.5% | 18.7% | 91.0%        | 2.1%         | 1.9%  | 5.4%  | 83.1% | 2.5%         | 5.5%         | 23.0% | 23.2% |
| <b>Conserved</b>  |           |       |       |              |              |       |       |       |              |              |       |       |
| #                 |           | 0     | 0     | 1114         | 1152         | 1100  | 1099  | 1017  | 1133         | 1064         | 0     | 0     |
| %                 |           | 0.0%  | 0.0%  | 91.0%        | 94.1%        | 89.9% | 89.8% | 83.1% | 92.6%        | 86.9%        | 0.0%  | 0.0%  |
| <b>Variations</b> |           |       |       |              |              |       |       |       |              |              |       |       |
| %                 | A         | 24.8% | 29.1% | 50.9%        | <b>31.9%</b> | 0.0%  | 47.2% | 34.8% | 30.8%        | 0.0%         | 20.5% | 29.9% |
|                   | C         | 21.7% | 31.4% | <b>20.9%</b> | 31.9%        | 13.7% | 0.0%  | 52.2% | 0.0%         | 36.3%        | 19.7% | 23.9% |
|                   | G         | 28.0% | 20.8% | 28.2%        | 0.0%         | 67.7% | 0.0%  | 13.0% | 36.3%        | <b>21.9%</b> | 36.8% | 23.0% |
|                   | T         | 25.5% | 18.7% | 0.0%         | 36.1%        | 18.5% | 52.8% | 0.0%  | <b>33.0%</b> | 41.9%        | 23.0% | 23.2% |

**Table S8C1. Statistics of the MRCA sequence (03. Tet. Xenopus) to variations of 11mers with TGACTCA (in CNEs and in DHSs)**

| Total             | Position  | 1     | 2     | 3     | 4     | 5     | 6     | 7     | 8     | 9     | 10    | 11    |
|-------------------|-----------|-------|-------|-------|-------|-------|-------|-------|-------|-------|-------|-------|
| 415               | Consensus | N     | N     | T     | G     | A     | C     | T     | C     | A     | N     | N     |
| #                 | A         | 136   | 152   | 8     | 13    | 393   | 10    | 11    | 6     | 380   | 80    | 120   |
|                   | C         | 81    | 122   | 8     | 2     | 4     | 390   | 8     | 392   | 16    | 93    | 67    |
|                   | G         | 91    | 72    | 1     | 393   | 16    | 0     | 0     | 2     | 8     | 81    | 65    |
|                   | T         | 107   | 69    | 398   | 7     | 2     | 15    | 396   | 15    | 11    | 161   | 163   |
| %                 | A         | 32.8% | 36.6% | 1.9%  | 3.1%  | 94.7% | 2.4%  | 2.7%  | 1.4%  | 91.6% | 19.3% | 28.9% |
|                   | C         | 19.5% | 29.4% | 1.9%  | 0.5%  | 1.0%  | 94.0% | 1.9%  | 94.5% | 3.9%  | 22.4% | 16.1% |
|                   | G         | 21.9% | 17.3% | 0.2%  | 94.7% | 3.9%  | 0.0%  | 0.0%  | 0.5%  | 1.9%  | 19.5% | 15.7% |
|                   | T         | 25.8% | 16.6% | 95.9% | 1.7%  | 0.5%  | 3.6%  | 95.4% | 3.6%  | 2.7%  | 38.8% | 39.3% |
| <b>Conserved</b>  |           |       |       |       |       |       |       |       |       |       |       |       |
| #                 |           | 0     | 0     | 398   | 393   | 393   | 390   | 396   | 392   | 380   | 0     | 0     |
| %                 |           | 0.0%  | 0.0%  | 95.9% | 94.7% | 94.7% | 94.0% | 95.4% | 94.5% | 91.6% | 0.0%  | 0.0%  |
| <b>Variations</b> |           |       |       |       |       |       |       |       |       |       |       |       |
| %                 | A         | 32.8% | 36.6% | 47.1% | 59.1% | 0.0%  | 40.0% | 57.9% | 26.1% | 0.0%  | 19.3% | 28.9% |
|                   | C         | 19.5% | 29.4% | 47.1% | 9.1%  | 18.2% | 0.0%  | 42.1% | 0.0%  | 45.7% | 22.4% | 16.1% |
|                   | G         | 21.9% | 17.3% | 5.9%  | 0.0%  | 72.7% | 0.0%  | 0.0%  | 8.7%  | 22.9% | 19.5% | 15.7% |
|                   | T         | 25.8% | 16.6% | 0.0%  | 31.8% | 9.1%  | 60.0% | 0.0%  | 65.2% | 31.4% | 38.8% | 39.3% |

**Table S8C2. Statistics of the MRCA sequence (03. Tet. Xenopus) to variations of 11mers with TGACTCA (in CNEs and no DHSs)**

| Total             | Position  | 1     | 2     | 3     | 4     | 5     | 6     | 7     | 8     | 9     | 10    | 11    |
|-------------------|-----------|-------|-------|-------|-------|-------|-------|-------|-------|-------|-------|-------|
| 67                | Consensus | N     | N     | T     | G     | A     | C     | T     | C     | A     | N     | N     |
| #                 | A         | 29    | 12    | 0     | 1     | 55    | 3     | 2     | 1     | 62    | 10    | 23    |
|                   | C         | 13    | 20    | 2     | 2     | 2     | 63    | 1     | 60    | 2     | 16    | 13    |
|                   | G         | 8     | 14    | 6     | 62    | 8     | 0     | 0     | 1     | 2     | 22    | 11    |
|                   | T         | 17    | 21    | 59    | 2     | 2     | 1     | 64    | 5     | 1     | 19    | 20    |
| %                 | A         | 43.3% | 17.9% | 0.0%  | 1.5%  | 82.1% | 4.5%  | 3.0%  | 1.5%  | 92.5% | 14.9% | 34.3% |
|                   | C         | 19.4% | 29.9% | 3.0%  | 3.0%  | 3.0%  | 94.0% | 1.5%  | 89.6% | 3.0%  | 23.9% | 19.4% |
|                   | G         | 11.9% | 20.9% | 9.0%  | 92.5% | 11.9% | 0.0%  | 0.0%  | 1.5%  | 3.0%  | 32.8% | 16.4% |
|                   | T         | 25.4% | 31.3% | 88.1% | 3.0%  | 3.0%  | 1.5%  | 95.5% | 7.5%  | 1.5%  | 28.4% | 29.9% |
| <b>Conserved</b>  |           |       |       |       |       |       |       |       |       |       |       |       |
| #                 |           | 0     | 0     | 59    | 62    | 55    | 63    | 64    | 60    | 62    | 0     | 0     |
| %                 |           | 0.0%  | 0.0%  | 88.1% | 92.5% | 82.1% | 94.0% | 95.5% | 89.6% | 92.5% | 0.0%  | 0.0%  |
| <b>Variations</b> |           |       |       |       |       |       |       |       |       |       |       |       |
| %                 | A         | 43.3% | 17.9% | 0.0%  | 20.0% | 0.0%  | 75.0% | 66.7% | 14.3% | 0.0%  | 14.9% | 34.3% |
|                   | C         | 19.4% | 29.9% | 25.0% | 40.0% | 16.7% | 0.0%  | 33.3% | 0.0%  | 40.0% | 23.9% | 19.4% |
|                   | G         | 11.9% | 20.9% | 75.0% | 0.0%  | 66.7% | 0.0%  | 0.0%  | 14.3% | 40.0% | 32.8% | 16.4% |
|                   | T         | 25.4% | 31.3% | 0.0%  | 40.0% | 16.7% | 25.0% | 0.0%  | 71.4% | 20.0% | 28.4% | 29.9% |

**Table S8C3. Statistics of the MRCA sequence (03. Tet. Xenopus) to variations of 11mers with TGACTCA (no CNEs)**

| Total             | Position  | 1     | 2     | 3     | 4     | 5     | 6     | 7     | 8     | 9     | 10    | 11    |
|-------------------|-----------|-------|-------|-------|-------|-------|-------|-------|-------|-------|-------|-------|
| 1277              | Consensus | N     | N     | T     | G     | A     | C     | T     | C     | A     | N     | N     |
| #                 | A         | 368   | 413   | 62    | 45    | 1099  | 59    | 87    | 19    | 1115  | 239   | 383   |
|                   | C         | 254   | 383   | 13    | 34    | 9     | 1161  | 81    | 1166  | 56    | 263   | 294   |
|                   | G         | 295   | 262   | 38    | 1150  | 145   | 0     | 11    | 41    | 36    | 488   | 237   |
|                   | T         | 360   | 219   | 1164  | 48    | 24    | 57    | 1098  | 51    | 70    | 287   | 363   |
| %                 | A         | 28.8% | 32.3% | 4.9%  | 3.5%  | 86.1% | 4.6%  | 6.8%  | 1.5%  | 87.3% | 18.7% | 30.0% |
|                   | C         | 19.9% | 30.0% | 1.0%  | 2.7%  | 0.7%  | 90.9% | 6.3%  | 91.3% | 4.4%  | 20.6% | 23.0% |
|                   | G         | 23.1% | 20.5% | 3.0%  | 90.1% | 11.4% | 0.0%  | 0.9%  | 3.2%  | 2.8%  | 38.2% | 18.6% |
|                   | T         | 28.2% | 17.1% | 91.2% | 3.8%  | 1.9%  | 4.5%  | 86.0% | 4.0%  | 5.5%  | 22.5% | 28.4% |
| <b>Conserved</b>  |           |       |       |       |       |       |       |       |       |       |       |       |
| #                 |           | 0     | 0     | 1164  | 1150  | 1099  | 1161  | 1098  | 1166  | 1115  | 0     | 0     |
| %                 |           | 0.0%  | 0.0%  | 91.2% | 90.1% | 86.1% | 90.9% | 86.0% | 91.3% | 87.3% | 0.0%  | 0.0%  |
| <b>Variations</b> |           |       |       |       |       |       |       |       |       |       |       |       |
| %                 | A         | 28.8% | 32.3% | 54.9% | 35.4% | 0.0%  | 50.9% | 48.6% | 17.1% | 0.0%  | 18.7% | 30.0% |
|                   | C         | 19.9% | 30.0% | 11.5% | 26.8% | 5.1%  | 0.0%  | 45.3% | 0.0%  | 34.6% | 20.6% | 23.0% |
|                   | G         | 23.1% | 20.5% | 33.6% | 0.0%  | 81.5% | 0.0%  | 6.1%  | 36.9% | 22.2% | 38.2% | 18.6% |
|                   | T         | 28.2% | 17.1% | 0.0%  | 37.8% | 13.5% | 49.1% | 0.0%  | 45.9% | 43.2% | 22.5% | 28.4% |



**Table S8D1. Statistics of the MRCA sequence (04. Amn. Chicken) to variations of 11mers with TGACTCA (in CNEs and in DHSs)**

| Total             | Position  | 1     | 2     | 3            | 4            | 5     | 6     | 7     | 8            | 9            | 10    | 11    |
|-------------------|-----------|-------|-------|--------------|--------------|-------|-------|-------|--------------|--------------|-------|-------|
| 1374              | Consensus | N     | N     | T            | G            | A     | C     | T     | C            | A            | N     | N     |
| #                 | A         | 472   | 509   | 3            | 21           | 1312  | 66    | 26    | 28           | 1302         | 264   | 421   |
|                   | C         | 239   | 307   | 18           | 6            | 14    | 1242  | 15    | 1301         | 15           | 284   | 251   |
|                   | G         | 290   | 322   | 10           | 1310         | 39    | 0     | 3     | 20           | 26           | 322   | 207   |
|                   | T         | 373   | 236   | 1343         | 37           | 9     | 66    | 1330  | 25           | 31           | 504   | 495   |
| %                 | A         | 34.4% | 37.0% | 0.2%         | 1.5%         | 95.5% | 4.8%  | 1.9%  | 2.0%         | 94.8%        | 19.2% | 30.6% |
|                   | C         | 17.4% | 22.3% | 1.3%         | 0.4%         | 1.0%  | 90.4% | 1.1%  | 94.7%        | 1.1%         | 20.7% | 18.3% |
|                   | G         | 21.1% | 23.4% | 0.7%         | 95.3%        | 2.8%  | 0.0%  | 0.2%  | 1.5%         | 1.9%         | 23.4% | 15.1% |
|                   | T         | 27.1% | 17.2% | 97.7%        | 2.7%         | 0.7%  | 4.8%  | 96.8% | 1.8%         | 2.3%         | 36.7% | 36.0% |
| <b>Conserved</b>  |           |       |       |              |              |       |       |       |              |              |       |       |
| #                 |           | 0     | 0     | 1343         | 1310         | 1312  | 1242  | 1330  | 1301         | 1302         | 0     | 0     |
| %                 |           | 0.0%  | 0.0%  | 97.7%        | 95.3%        | 95.5% | 90.4% | 96.8% | 94.7%        | 94.8%        | 0.0%  | 0.0%  |
| <b>Variations</b> |           |       |       |              |              |       |       |       |              |              |       |       |
| %                 | A         | 34.4% | 37.0% | 9.7%         | <b>32.8%</b> | 0.0%  | 50.0% | 59.1% | 38.4%        | 0.0%         | 19.2% | 30.6% |
|                   | C         | 17.4% | 22.3% | <b>58.1%</b> | 9.4%         | 22.6% | 0.0%  | 34.1% | 0.0%         | 20.8%        | 20.7% | 18.3% |
|                   | G         | 21.1% | 23.4% | 32.3%        | 0.0%         | 62.9% | 0.0%  | 6.8%  | 27.4%        | <b>36.1%</b> | 23.4% | 15.1% |
|                   | T         | 27.1% | 17.2% | 0.0%         | 57.8%        | 14.5% | 50.0% | 0.0%  | <b>34.2%</b> | 43.1%        | 36.7% | 36.0% |

**Table S8D2. Statistics of the MRCA sequence (04. Amn. Chicken) to variations of 11mers with TGACTCA (in CNEs and no DHSs)**

| Total             | Position  | 1     | 2     | 3            | 4            | 5     | 6     | 7     | 8            | 9            | 10    | 11    |
|-------------------|-----------|-------|-------|--------------|--------------|-------|-------|-------|--------------|--------------|-------|-------|
| 280               | Consensus | N     | N     | T            | G            | A     | C     | T     | C            | A            | N     | N     |
| #                 | A         | 112   | 81    | 2            | 15           | 257   | 18    | 12    | 11           | 263          | 77    | 89    |
|                   | C         | 54    | 60    | 8            | 3            | 4     | 250   | 7     | 245          | 6            | 45    | 35    |
|                   | G         | 44    | 53    | 6            | 257          | 11    | 0     | 1     | 5            | 8            | 71    | 57    |
|                   | T         | 70    | 86    | 264          | 5            | 8     | 12    | 260   | 19           | 3            | 87    | 99    |
| %                 | A         | 40.0% | 28.9% | 0.7%         | 5.4%         | 91.8% | 6.4%  | 4.3%  | 3.9%         | 93.9%        | 27.5% | 31.8% |
|                   | C         | 19.3% | 21.4% | 2.9%         | 1.1%         | 1.4%  | 89.3% | 2.5%  | 87.5%        | 2.1%         | 16.1% | 12.5% |
|                   | G         | 15.7% | 18.9% | 2.1%         | 91.8%        | 3.9%  | 0.0%  | 0.4%  | 1.8%         | 2.9%         | 25.4% | 20.4% |
|                   | T         | 25.0% | 30.7% | 94.3%        | 1.8%         | 2.9%  | 4.3%  | 92.9% | 6.8%         | 1.1%         | 31.1% | 35.4% |
| <b>Conserved</b>  |           |       |       |              |              |       |       |       |              |              |       |       |
| #                 |           | 0     | 0     | 264          | 257          | 257   | 250   | 260   | 245          | 263          | 0     | 0     |
| %                 |           | 0.0%  | 0.0%  | 94.3%        | 91.8%        | 91.8% | 89.3% | 92.9% | 87.5%        | 93.9%        | 0.0%  | 0.0%  |
| <b>Variations</b> |           |       |       |              |              |       |       |       |              |              |       |       |
| %                 | A         | 40.0% | 28.9% | 12.5%        | <b>65.2%</b> | 0.0%  | 60.0% | 60.0% | 31.4%        | 0.0%         | 27.5% | 31.8% |
|                   | C         | 19.3% | 21.4% | <b>50.0%</b> | 13.0%        | 17.4% | 0.0%  | 35.0% | 0.0%         | 35.3%        | 16.1% | 12.5% |
|                   | G         | 15.7% | 18.9% | 37.5%        | 0.0%         | 47.8% | 0.0%  | 5.0%  | 14.3%        | <b>47.1%</b> | 25.4% | 20.4% |
|                   | T         | 25.0% | 30.7% | 0.0%         | 21.7%        | 34.8% | 40.0% | 0.0%  | <b>54.3%</b> | 17.6%        | 31.1% | 35.4% |

**Table S8D3. Statistics of the MRCA sequence (04. Amn. Chicken) to variations of 11mers with TGACTCA (no CNEs)**

| Total             | Position  | 1     | 2     | 3            | 4            | 5     | 6     | 7     | 8            | 9            | 10    | 11    |
|-------------------|-----------|-------|-------|--------------|--------------|-------|-------|-------|--------------|--------------|-------|-------|
| 1981              | Consensus | N     | N     | T            | G            | A     | C     | T     | C            | A            | N     | N     |
| #                 | A         | 483   | 549   | 74           | 65           | 1772  | 109   | 74    | 29           | 1800         | 404   | 606   |
|                   | C         | 421   | 601   | 58           | 45           | 38    | 1757  | 109   | 1853         | 56           | 408   | 466   |
|                   | G         | 506   | 431   | 39           | 1819         | 130   | 0     | 26    | 40           | 47           | 704   | 421   |
|                   | T         | 571   | 400   | 1810         | 52           | 41    | 115   | 1772  | 59           | 78           | 465   | 488   |
| %                 | A         | 24.4% | 27.7% | 3.7%         | 3.3%         | 89.4% | 5.5%  | 3.7%  | 1.5%         | 90.9%        | 20.4% | 30.6% |
|                   | C         | 21.3% | 30.3% | 2.9%         | 2.3%         | 1.9%  | 88.7% | 5.5%  | 93.5%        | 2.8%         | 20.6% | 23.5% |
|                   | G         | 25.5% | 21.8% | 2.0%         | 91.8%        | 6.6%  | 0.0%  | 1.3%  | 2.0%         | 2.4%         | 35.5% | 21.3% |
|                   | T         | 28.8% | 20.2% | 91.4%        | 2.6%         | 2.1%  | 5.8%  | 89.4% | 3.0%         | 3.9%         | 23.5% | 24.6% |
| <b>Conserved</b>  |           |       |       |              |              |       |       |       |              |              |       |       |
| #                 |           | 0     | 0     | 1810         | 1819         | 1772  | 1757  | 1772  | 1853         | 1800         | 0     | 0     |
| %                 |           | 0.0%  | 0.0%  | 91.4%        | 91.8%        | 89.4% | 88.7% | 89.4% | 93.5%        | 90.9%        | 0.0%  | 0.0%  |
| <b>Variations</b> |           |       |       |              |              |       |       |       |              |              |       |       |
| %                 | A         | 24.4% | 27.7% | 43.3%        | <b>40.1%</b> | 0.0%  | 48.7% | 35.4% | 22.7%        | 0.0%         | 20.4% | 30.6% |
|                   | C         | 21.3% | 30.3% | <b>33.9%</b> | 27.8%        | 18.2% | 0.0%  | 52.2% | 0.0%         | 30.9%        | 20.6% | 23.5% |
|                   | G         | 25.5% | 21.8% | 22.8%        | 0.0%         | 62.2% | 0.0%  | 12.4% | 31.3%        | <b>26.0%</b> | 35.5% | 21.3% |
|                   | T         | 28.8% | 20.2% | 0.0%         | 32.1%        | 19.6% | 51.3% | 0.0%  | <b>46.1%</b> | 43.1%        | 23.5% | 24.6% |

**Table S8E1. Statistics of the MRCA sequence (04. Amn. Lizard) to variations of 11mers with TGACTCA (in CNEs and in DHSs)**

| Total             | Position  | 1     | 2     | 3            | 4            | 5     | 6     | 7     | 8            | 9            | 10    | 11    |
|-------------------|-----------|-------|-------|--------------|--------------|-------|-------|-------|--------------|--------------|-------|-------|
| 993               | Consensus | N     | N     | T            | G            | A     | C     | T     | C            | A            | N     | N     |
| #                 | A         | 335   | 367   | 8            | 17           | 937   | 49    | 12    | 18           | 939          | 190   | 291   |
|                   | C         | 166   | 213   | 7            | 5            | 12    | 895   | 14    | 940          | 20           | 176   | 193   |
|                   | G         | 225   | 219   | 6            | 948          | 31    | 0     | 3     | 11           | 16           | 249   | 161   |
|                   | T         | 267   | 194   | 972          | 23           | 13    | 49    | 964   | 24           | 18           | 378   | 348   |
| %                 | A         | 33.7% | 37.0% | 0.8%         | 1.7%         | 94.4% | 4.9%  | 1.2%  | 1.8%         | 94.6%        | 19.1% | 29.3% |
|                   | C         | 16.7% | 21.5% | 0.7%         | 0.5%         | 1.2%  | 90.1% | 1.4%  | 94.7%        | 2.0%         | 17.7% | 19.4% |
|                   | G         | 22.7% | 22.1% | 0.6%         | 95.5%        | 3.1%  | 0.0%  | 0.3%  | 1.1%         | 1.6%         | 25.1% | 16.2% |
|                   | T         | 26.9% | 19.5% | 97.9%        | 2.3%         | 1.3%  | 4.9%  | 97.1% | 2.4%         | 1.8%         | 38.1% | 35.0% |
| <b>Conserved</b>  |           |       |       |              |              |       |       |       |              |              |       |       |
| #                 |           | 0     | 0     | 972          | 948          | 937   | 895   | 964   | 940          | 939          | 0     | 0     |
| %                 |           | 0.0%  | 0.0%  | 97.9%        | 95.5%        | 94.4% | 90.1% | 97.1% | 94.7%        | 94.6%        | 0.0%  | 0.0%  |
| <b>Variations</b> |           |       |       |              |              |       |       |       |              |              |       |       |
| %                 | A         | 33.7% | 37.0% | 38.1%        | <b>37.8%</b> | 0.0%  | 50.0% | 41.4% | 34.0%        | 0.0%         | 19.1% | 29.3% |
|                   | C         | 16.7% | 21.5% | <b>33.3%</b> | 11.1%        | 21.4% | 0.0%  | 48.3% | 0.0%         | 37.0%        | 17.7% | 19.4% |
|                   | G         | 22.7% | 22.1% | 28.6%        | 0.0%         | 55.4% | 0.0%  | 10.3% | 20.8%        | <b>29.6%</b> | 25.1% | 16.2% |
|                   | T         | 26.9% | 19.5% | 0.0%         | 51.1%        | 23.2% | 50.0% | 0.0%  | <b>45.3%</b> | 33.3%        | 38.1% | 35.0% |

**Table S8E2. Statistics of the MRCA sequence (04. Amn. Lizard) to variations of 11mers with TGACTCA (in CNEs and no DHSs)**

| Total             | Position  | 1     | 2     | 3            | 4            | 5     | 6     | 7     | 8            | 9            | 10    | 11    |
|-------------------|-----------|-------|-------|--------------|--------------|-------|-------|-------|--------------|--------------|-------|-------|
| 214               | Consensus | N     | N     | T            | G            | A     | C     | T     | C            | A            | N     | N     |
| #                 | A         | 68    | 62    | 1            | 4            | 188   | 15    | 9     | 8            | 199          | 59    | 55    |
|                   | C         | 43    | 51    | 2            | 4            | 4     | 196   | 8     | 188          | 5            | 26    | 31    |
|                   | G         | 36    | 36    | 4            | 198          | 14    | 0     | 0     | 8            | 6            | 51    | 48    |
|                   | T         | 67    | 65    | 207          | 8            | 8     | 3     | 197   | 10           | 4            | 78    | 80    |
| %                 | A         | 31.8% | 29.0% | 0.5%         | 1.9%         | 87.9% | 7.0%  | 4.2%  | 3.7%         | 93.0%        | 27.6% | 25.7% |
|                   | C         | 20.1% | 23.8% | 0.9%         | 1.9%         | 1.9%  | 91.6% | 3.7%  | 87.9%        | 2.3%         | 12.1% | 14.5% |
|                   | G         | 16.8% | 16.8% | 1.9%         | 92.5%        | 6.5%  | 0.0%  | 0.0%  | 3.7%         | 2.8%         | 23.8% | 22.4% |
|                   | T         | 31.3% | 30.4% | 96.7%        | 3.7%         | 3.7%  | 1.4%  | 92.1% | 4.7%         | 1.9%         | 36.4% | 37.4% |
| <b>Conserved</b>  |           |       |       |              |              |       |       |       |              |              |       |       |
| #                 |           | 0     | 0     | 207          | 198          | 188   | 196   | 197   | 188          | 199          | 0     | 0     |
| %                 |           | 0.0%  | 0.0%  | 96.7%        | 92.5%        | 87.9% | 91.6% | 92.1% | 87.9%        | 93.0%        | 0.0%  | 0.0%  |
| <b>Variations</b> |           |       |       |              |              |       |       |       |              |              |       |       |
| %                 | A         | 31.8% | 29.0% | 14.3%        | <b>25.0%</b> | 0.0%  | 83.3% | 52.9% | 30.8%        | 0.0%         | 27.6% | 25.7% |
|                   | C         | 20.1% | 23.8% | <b>28.6%</b> | 25.0%        | 15.4% | 0.0%  | 47.1% | 0.0%         | 33.3%        | 12.1% | 14.5% |
|                   | G         | 16.8% | 16.8% | 57.1%        | 0.0%         | 53.8% | 0.0%  | 0.0%  | 30.8%        | <b>40.0%</b> | 23.8% | 22.4% |
|                   | T         | 31.3% | 30.4% | 0.0%         | 50.0%        | 30.8% | 16.7% | 0.0%  | <b>38.5%</b> | 26.7%        | 36.4% | 37.4% |

**Table S8E3. Statistics of the MRCA sequence (04. Amn. Lizard) to variations of 11mers with TGACTCA (no CNEs)**

| Total             | Position  | 1     | 2     | 3            | 4            | 5     | 6     | 7     | 8            | 9            | 10    | 11    |
|-------------------|-----------|-------|-------|--------------|--------------|-------|-------|-------|--------------|--------------|-------|-------|
| 1811              | Consensus | N     | N     | T            | G            | A     | C     | T     | C            | A            | N     | N     |
| #                 | A         | 458   | 524   | 67           | 45           | 1598  | 116   | 82    | 22           | 1625         | 409   | 539   |
|                   | C         | 401   | 491   | 34           | 53           | 25    | 1584  | 118   | 1701         | 57           | 353   | 435   |
|                   | G         | 435   | 363   | 39           | 1663         | 144   | 0     | 31    | 42           | 38           | 653   | 383   |
|                   | T         | 517   | 433   | 1671         | 50           | 44    | 111   | 1580  | 46           | 91           | 396   | 454   |
| %                 | A         | 25.3% | 28.9% | 3.7%         | 2.5%         | 88.2% | 6.4%  | 4.5%  | 1.2%         | 89.7%        | 22.6% | 29.8% |
|                   | C         | 22.1% | 27.1% | 1.9%         | 2.9%         | 1.4%  | 87.5% | 6.5%  | 93.9%        | 3.1%         | 19.5% | 24.0% |
|                   | G         | 24.0% | 20.0% | 2.2%         | 91.8%        | 8.0%  | 0.0%  | 1.7%  | 2.3%         | 2.1%         | 36.1% | 21.1% |
|                   | T         | 28.5% | 23.9% | 92.3%        | 2.8%         | 2.4%  | 6.1%  | 87.2% | 2.5%         | 5.0%         | 21.9% | 25.1% |
| <b>Conserved</b>  |           |       |       |              |              |       |       |       |              |              |       |       |
| #                 |           | 0     | 0     | 1671         | 1663         | 1598  | 1584  | 1580  | 1701         | 1625         | 0     | 0     |
| %                 |           | 0.0%  | 0.0%  | 92.3%        | 91.8%        | 88.2% | 87.5% | 87.2% | 93.9%        | 89.7%        | 0.0%  | 0.0%  |
| <b>Variations</b> |           |       |       |              |              |       |       |       |              |              |       |       |
| %                 | A         | 25.3% | 28.9% | 47.9%        | <b>30.4%</b> | 0.0%  | 51.1% | 35.5% | 20.0%        | 0.0%         | 22.6% | 29.8% |
|                   | C         | 22.1% | 27.1% | <b>24.3%</b> | 35.8%        | 11.7% | 0.0%  | 51.1% | 0.0%         | 30.6%        | 19.5% | 24.0% |
|                   | G         | 24.0% | 20.0% | 27.9%        | 0.0%         | 67.6% | 0.0%  | 13.4% | 38.2%        | <b>20.4%</b> | 36.1% | 21.1% |
|                   | T         | 28.5% | 23.9% | 0.0%         | 33.8%        | 20.7% | 48.9% | 0.0%  | <b>41.8%</b> | 48.9%        | 21.9% | 25.1% |

**Table S8F1. Statistics of the MRCA sequence (05. The. Opossum) to variations of 11mers with TGACTCA (in CNEs and in DHSs)**

| Total             | Position  | 1     | 2     | 3            | 4            | 5     | 6     | 7     | 8            | 9            | 10    | 11    |
|-------------------|-----------|-------|-------|--------------|--------------|-------|-------|-------|--------------|--------------|-------|-------|
| 5748              | Consensus | N     | N     | T            | G            | A     | C     | T     | C            | A            | N     | N     |
| #                 | A         | 1825  | 2015  | 48           | 80           | 5533  | 281   | 47    | 109          | 5536         | 1009  | 1629  |
|                   | C         | 948   | 1453  | 44           | 35           | 52    | 5192  | 78    | 5458         | 65           | 1219  | 1281  |
|                   | G         | 1321  | 1354  | 42           | 5561         | 133   | 0     | 15    | 52           | 63           | 1479  | 972   |
|                   | T         | 1654  | 926   | 5614         | 72           | 30    | 275   | 5608  | 129          | 84           | 2041  | 1866  |
| %                 | A         | 31.8% | 35.1% | 0.8%         | 1.4%         | 96.3% | 4.9%  | 0.8%  | 1.9%         | 96.3%        | 17.6% | 28.3% |
|                   | C         | 16.5% | 25.3% | 0.8%         | 0.6%         | 0.9%  | 90.3% | 1.4%  | 95.0%        | 1.1%         | 21.2% | 22.3% |
|                   | G         | 23.0% | 23.6% | 0.7%         | 96.7%        | 2.3%  | 0.0%  | 0.3%  | 0.9%         | 1.1%         | 25.7% | 16.9% |
|                   | T         | 28.8% | 16.1% | 97.7%        | 1.3%         | 0.5%  | 4.8%  | 97.6% | 2.2%         | 1.5%         | 35.5% | 32.5% |
| <b>Conserved</b>  |           |       |       |              |              |       |       |       |              |              |       |       |
| #                 |           | 0     | 0     | 5614         | 5561         | 5533  | 5192  | 5608  | 5458         | 5536         | 0     | 0     |
| %                 |           | 0.0%  | 0.0%  | 97.7%        | 96.7%        | 96.3% | 90.3% | 97.6% | 95.0%        | 96.3%        | 0.0%  | 0.0%  |
| <b>Variations</b> |           |       |       |              |              |       |       |       |              |              |       |       |
| %                 | A         | 31.8% | 35.1% | 35.8%        | <b>42.8%</b> | 0.0%  | 50.5% | 33.6% | 37.6%        | 0.0%         | 17.6% | 28.3% |
|                   | C         | 16.5% | 25.3% | <b>32.8%</b> | 18.7%        | 24.2% | 0.0%  | 55.7% | 0.0%         | 30.7%        | 21.2% | 22.3% |
|                   | G         | 23.0% | 23.6% | 31.3%        | 0.0%         | 61.9% | 0.0%  | 10.7% | 17.9%        | <b>29.7%</b> | 25.7% | 16.9% |
|                   | T         | 28.8% | 16.1% | 0.0%         | 38.5%        | 14.0% | 49.5% | 0.0%  | <b>44.5%</b> | 39.6%        | 35.5% | 32.5% |

**Table S8F2. Statistics of the MRCA sequence (05. The. Opossum) to variations of 11mers with TGACTCA (in CNEs and no DHSs)**

| Total             | Position  | 1     | 2     | 3            | 4            | 5     | 6     | 7     | 8            | 9            | 10    | 11    |
|-------------------|-----------|-------|-------|--------------|--------------|-------|-------|-------|--------------|--------------|-------|-------|
| 1138              | Consensus | N     | N     | T            | G            | A     | C     | T     | C            | A            | N     | N     |
| #                 | A         | 385   | 378   | 11           | 25           | 1054  | 64    | 7     | 31           | 1066         | 306   | 309   |
|                   | C         | 190   | 252   | 13           | 4            | 23    | 1005  | 34    | 1037         | 27           | 162   | 206   |
|                   | G         | 200   | 183   | 9            | 1088         | 48    | 0     | 6     | 21           | 16           | 301   | 206   |
|                   | T         | 363   | 325   | 1105         | 21           | 13    | 69    | 1091  | 49           | 29           | 369   | 417   |
| %                 | A         | 33.8% | 33.2% | 1.0%         | 2.2%         | 92.6% | 5.6%  | 0.6%  | 2.7%         | 93.7%        | 26.9% | 27.2% |
|                   | C         | 16.7% | 22.1% | 1.1%         | 0.4%         | 2.0%  | 88.3% | 3.0%  | 91.1%        | 2.4%         | 14.2% | 18.1% |
|                   | G         | 17.6% | 16.1% | 0.8%         | 95.6%        | 4.2%  | 0.0%  | 0.5%  | 1.8%         | 1.4%         | 26.4% | 18.1% |
|                   | T         | 31.9% | 28.6% | 97.1%        | 1.8%         | 1.1%  | 6.1%  | 95.9% | 4.3%         | 2.5%         | 32.4% | 36.6% |
| <b>Conserved</b>  |           |       |       |              |              |       |       |       |              |              |       |       |
| #                 |           | 0     | 0     | 1105         | 1088         | 1054  | 1005  | 1091  | 1037         | 1066         | 0     | 0     |
| %                 |           | 0.0%  | 0.0%  | 97.1%        | 95.6%        | 92.6% | 88.3% | 95.9% | 91.1%        | 93.7%        | 0.0%  | 0.0%  |
| <b>Variations</b> |           |       |       |              |              |       |       |       |              |              |       |       |
| %                 | A         | 33.8% | 33.2% | 33.3%        | <b>50.0%</b> | 0.0%  | 48.1% | 14.9% | 30.7%        | 0.0%         | 26.9% | 27.2% |
|                   | C         | 16.7% | 22.1% | <b>39.4%</b> | 8.0%         | 27.4% | 0.0%  | 72.3% | 0.0%         | 37.5%        | 14.2% | 18.1% |
|                   | G         | 17.6% | 16.1% | 27.3%        | 0.0%         | 57.1% | 0.0%  | 12.8% | 20.8%        | <b>22.2%</b> | 26.4% | 18.1% |
|                   | T         | 31.9% | 28.6% | 0.0%         | 42.0%        | 15.5% | 51.9% | 0.0%  | <b>48.5%</b> | 40.3%        | 32.4% | 36.6% |

**Table S8F3. Statistics of the MRCA sequence (05. The. Opossum) to variations of 11mers with TGACTCA (no CNEs)**

| Total             | Position  | 1     | 2     | 3            | 4            | 5     | 6     | 7     | 8            | 9            | 10    | 11    |
|-------------------|-----------|-------|-------|--------------|--------------|-------|-------|-------|--------------|--------------|-------|-------|
| 10053             | Consensus | N     | N     | T            | G            | A     | C     | T     | C            | A            | N     | N     |
| #                 | A         | 2864  | 2917  | 226          | 333          | 9185  | 682   | 195   | 272          | 9308         | 2064  | 2912  |
|                   | C         | 1808  | 2755  | 108          | 171          | 204   | 8684  | 420   | 9172         | 290          | 2106  | 2374  |
|                   | G         | 2419  | 2270  | 168          | 9297         | 476   | 0     | 34    | 201          | 190          | 3081  | 1870  |
|                   | T         | 2962  | 2111  | 9551         | 252          | 188   | 687   | 9404  | 408          | 265          | 2802  | 2897  |
| %                 | A         | 28.5% | 29.0% | 2.2%         | 3.3%         | 91.4% | 6.8%  | 1.9%  | 2.7%         | 92.6%        | 20.5% | 29.0% |
|                   | C         | 18.0% | 27.4% | 1.1%         | 1.7%         | 2.0%  | 86.4% | 4.2%  | 91.2%        | 2.9%         | 20.9% | 23.6% |
|                   | G         | 24.1% | 22.6% | 1.7%         | 92.5%        | 4.7%  | 0.0%  | 0.3%  | 2.0%         | 1.9%         | 30.6% | 18.6% |
|                   | T         | 29.5% | 21.0% | 95.0%        | 2.5%         | 1.9%  | 6.8%  | 93.5% | 4.1%         | 2.6%         | 27.9% | 28.8% |
| <b>Conserved</b>  |           |       |       |              |              |       |       |       |              |              |       |       |
| #                 |           | 0     | 0     | 9551         | 9297         | 9185  | 8684  | 9404  | 9172         | 9308         | 0     | 0     |
| %                 |           | 0.0%  | 0.0%  | 95.0%        | 92.5%        | 91.4% | 86.4% | 93.5% | 91.2%        | 92.6%        | 0.0%  | 0.0%  |
| <b>Variations</b> |           |       |       |              |              |       |       |       |              |              |       |       |
| %                 | A         | 28.5% | 29.0% | 45.0%        | <b>44.0%</b> | 0.0%  | 49.8% | 30.0% | 30.9%        | 0.0%         | 20.5% | 29.0% |
|                   | C         | 18.0% | 27.4% | <b>21.5%</b> | 22.6%        | 23.5% | 0.0%  | 64.7% | 0.0%         | 38.9%        | 20.9% | 23.6% |
|                   | G         | 24.1% | 22.6% | 33.5%        | 0.0%         | 54.8% | 0.0%  | 5.2%  | 22.8%        | <b>25.5%</b> | 30.6% | 18.6% |
|                   | T         | 29.5% | 21.0% | 0.0%         | 33.3%        | 21.7% | 50.2% | 0.0%  | <b>46.3%</b> | 35.6%        | 27.9% | 28.8% |

**Table S8G1. Statistics of the MRCA sequence (06. Eut. Elephant) to variations of 11mers with TGACTCA (in CNEs and in DHSs)**

| Total             | Position  | 1     | 2     | 3     | 4     | 5     | 6     | 7     | 8     | 9     | 10    | 11    |
|-------------------|-----------|-------|-------|-------|-------|-------|-------|-------|-------|-------|-------|-------|
| 11,741            | Consensus | N     | N     | T     | G     | A     | C     | T     | C     | A     | N     | N     |
| #                 | A         | 3582  | 3797  | 71    | 128   | 11350 | 307   | 51    | 102   | 11326 | 2127  | 3431  |
|                   | C         | 2028  | 3084  | 130   | 50    | 80    | 11117 | 152   | 11326 | 119   | 2593  | 2607  |
|                   | G         | 2672  | 2921  | 78    | 11456 | 266   | 0     | 47    | 89    | 192   | 3380  | 2181  |
|                   | T         | 3459  | 1939  | 11462 | 107   | 45    | 317   | 11491 | 224   | 104   | 3641  | 3522  |
| %                 | A         | 30.5% | 32.3% | 0.6%  | 1.1%  | 96.7% | 2.6%  | 0.4%  | 0.9%  | 96.5% | 18.1% | 29.2% |
|                   | C         | 17.3% | 26.3% | 1.1%  | 0.4%  | 0.7%  | 94.7% | 1.3%  | 96.5% | 1.0%  | 22.1% | 22.2% |
|                   | G         | 22.8% | 24.9% | 0.7%  | 97.6% | 2.3%  | 0.0%  | 0.4%  | 0.8%  | 1.6%  | 28.8% | 18.6% |
|                   | T         | 29.5% | 16.5% | 97.6% | 0.9%  | 0.4%  | 2.7%  | 97.9% | 1.9%  | 0.9%  | 31.0% | 30.0% |
| <b>Conserved</b>  |           |       |       |       |       |       |       |       |       |       |       |       |
| #                 |           | 0     | 0     | 11462 | 11456 | 11350 | 11117 | 11491 | 11326 | 11326 | 0     | 0     |
| %                 |           | 0.0%  | 0.0%  | 97.6% | 97.6% | 96.7% | 94.7% | 97.9% | 96.5% | 96.5% | 0.0%  | 0.0%  |
| <b>Variations</b> |           |       |       |       |       |       |       |       |       |       |       |       |
| %                 | A         | 30.5% | 32.3% | 25.4% | 44.9% | 0.0%  | 49.2% | 20.4% | 24.6% | 0.0%  | 18.1% | 29.2% |
|                   | C         | 17.3% | 26.3% | 46.6% | 17.5% | 20.5% | 0.0%  | 60.8% | 0.0%  | 28.7% | 22.1% | 22.2% |
|                   | G         | 22.8% | 24.9% | 28.0% | 0.0%  | 68.0% | 0.0%  | 18.8% | 21.4% | 46.3% | 28.8% | 18.6% |
|                   | T         | 29.5% | 16.5% | 0.0%  | 37.5% | 11.5% | 50.8% | 0.0%  | 54.0% | 25.1% | 31.0% | 30.0% |

**Table S8G2. Statistics of the MRCA sequence (06. Eut. Elephant) to variations of 11mers with TGACTCA (in CNEs and no DHSs)**

| Total             | Position  | 1     | 2     | 3     | 4     | 5     | 6     | 7     | 8     | 9     | 10    | 11    |
|-------------------|-----------|-------|-------|-------|-------|-------|-------|-------|-------|-------|-------|-------|
| 2,966             | Consensus | N     | N     | T     | G     | A     | C     | T     | C     | A     | N     | N     |
| #                 | A         | 999   | 870   | 35    | 67    | 2796  | 118   | 38    | 35    | 2849  | 840   | 962   |
|                   | C         | 512   | 705   | 42    | 32    | 33    | 2724  | 68    | 2794  | 35    | 458   | 487   |
|                   | G         | 478   | 490   | 32    | 2835  | 113   | 0     | 11    | 46    | 39    | 789   | 513   |
|                   | T         | 977   | 901   | 2857  | 32    | 24    | 124   | 2849  | 91    | 43    | 879   | 1004  |
| %                 | A         | 33.7% | 29.3% | 1.2%  | 2.3%  | 94.3% | 4.0%  | 1.3%  | 1.2%  | 96.1% | 28.3% | 32.4% |
|                   | C         | 17.3% | 23.8% | 1.4%  | 1.1%  | 1.1%  | 91.8% | 2.3%  | 94.2% | 1.2%  | 15.4% | 16.4% |
|                   | G         | 16.1% | 16.5% | 1.1%  | 95.6% | 3.8%  | 0.0%  | 0.4%  | 1.6%  | 1.3%  | 26.6% | 17.3% |
|                   | T         | 32.9% | 30.4% | 96.3% | 1.1%  | 0.8%  | 4.2%  | 96.1% | 3.1%  | 1.4%  | 29.6% | 33.9% |
| <b>Conserved</b>  |           |       |       |       |       |       |       |       |       |       |       |       |
| #                 |           | 0     | 0     | 2857  | 2835  | 2796  | 2724  | 2849  | 2794  | 2849  | 0     | 0     |
| %                 |           | 0.0%  | 0.0%  | 96.3% | 95.6% | 94.3% | 91.8% | 96.1% | 94.2% | 96.1% | 0.0%  | 0.0%  |
| <b>Variations</b> |           |       |       |       |       |       |       |       |       |       |       |       |
| %                 | A         | 33.7% | 29.3% | 32.1% | 51.1% | 0.0%  | 48.8% | 32.5% | 20.3% | 0.0%  | 28.3% | 32.4% |
|                   | C         | 17.3% | 23.8% | 38.5% | 24.4% | 19.4% | 0.0%  | 58.1% | 0.0%  | 29.9% | 15.4% | 16.4% |
|                   | G         | 16.1% | 16.5% | 29.4% | 0.0%  | 66.5% | 0.0%  | 9.4%  | 26.7% | 33.3% | 26.6% | 17.3% |
|                   | T         | 32.9% | 30.4% | 0.0%  | 24.4% | 14.1% | 51.2% | 0.0%  | 52.9% | 36.8% | 29.6% | 33.9% |

**Table S8G3. Statistics of the MRCA sequence (06. Eut. Elephant) to variations of 11mers with TGACTCA (no CNEs)**

| Total             | Position  | 1     | 2     | 3     | 4     | 5     | 6     | 7     | 8     | 9     | 10    | 11    |
|-------------------|-----------|-------|-------|-------|-------|-------|-------|-------|-------|-------|-------|-------|
| 95,610            | Consensus | N     | N     | T     | G     | A     | C     | T     | C     | A     | N     | N     |
| #                 | A         | 26653 | 24786 | 2013  | 3913  | 86299 | 4786  | 1631  | 1723  | 88605 | 23024 | 29896 |
|                   | C         | 19620 | 27962 | 1548  | 1529  | 2034  | 85977 | 4922  | 87544 | 2372  | 19297 | 20023 |
|                   | G         | 19260 | 21052 | 1838  | 88202 | 5886  | 0     | 428   | 1944  | 1942  | 29611 | 18920 |
|                   | T         | 30077 | 21810 | 90211 | 1966  | 1391  | 4847  | 88629 | 4399  | 2691  | 23678 | 26771 |
| %                 | A         | 27.9% | 25.9% | 2.1%  | 4.1%  | 90.3% | 5.0%  | 1.7%  | 1.8%  | 92.7% | 24.1% | 31.3% |
|                   | C         | 20.5% | 29.2% | 1.6%  | 1.6%  | 2.1%  | 89.9% | 5.1%  | 91.6% | 2.5%  | 20.2% | 20.9% |
|                   | G         | 20.1% | 22.0% | 1.9%  | 92.3% | 6.2%  | 0.0%  | 0.4%  | 2.0%  | 2.0%  | 31.0% | 19.8% |
|                   | T         | 31.5% | 22.8% | 94.4% | 2.1%  | 1.5%  | 5.1%  | 92.7% | 4.6%  | 2.8%  | 24.8% | 28.0% |
| <b>Conserved</b>  |           |       |       |       |       |       |       |       |       |       |       |       |
| #                 |           | 0     | 0     | 90211 | 88202 | 86299 | 85977 | 88629 | 87544 | 88605 | 0     | 0     |
| %                 |           | 0.0%  | 0.0%  | 94.4% | 92.3% | 90.3% | 89.9% | 92.7% | 91.6% | 92.7% | 0.0%  | 0.0%  |
| <b>Variations</b> |           |       |       |       |       |       |       |       |       |       |       |       |
| %                 | A         | 27.9% | 25.9% | 37.3% | 52.8% | 0.0%  | 49.7% | 23.4% | 21.4% | 0.0%  | 24.1% | 31.3% |
|                   | C         | 20.5% | 29.2% | 28.7% | 20.6% | 21.8% | 0.0%  | 70.5% | 0.0%  | 33.9% | 20.2% | 20.9% |
|                   | G         | 20.1% | 22.0% | 34.0% | 0.0%  | 63.2% | 0.0%  | 6.1%  | 24.1% | 27.7% | 31.0% | 19.8% |
|                   | T         | 31.5% | 22.8% | 0.0%  | 26.5% | 14.9% | 50.3% | 0.0%  | 54.5% | 38.4% | 24.8% | 28.0% |

**Table S8H1. Statistics of the MRCA sequence (07. Bor. Dog) to variations of 11mers with TGACTCA (in CNEs and in DHSs)**

| Total             | Position  | 1     | 2     | 3     | 4     | 5     | 6     | 7     | 8     | 9     | 10    | 11    |
|-------------------|-----------|-------|-------|-------|-------|-------|-------|-------|-------|-------|-------|-------|
| 12,125            | Consensus | N     | N     | T     | G     | A     | C     | T     | C     | A     | N     | N     |
| #                 | A         | 3753  | 4009  | 58    | 111   | 11791 | 327   | 43    | 91    | 11749 | 2229  | 3536  |
|                   | C         | 2054  | 3152  | 129   | 37    | 61    | 11485 | 132   | 11817 | 129   | 2659  | 2709  |
|                   | G         | 2821  | 2977  | 73    | 11889 | 219   | 0     | 23    | 49    | 153   | 3424  | 2220  |
|                   | T         | 3497  | 1987  | 11865 | 88    | 54    | 313   | 11927 | 168   | 94    | 3813  | 3660  |
| %                 | A         | 31.0% | 33.1% | 0.5%  | 0.9%  | 97.2% | 2.7%  | 0.4%  | 0.8%  | 96.9% | 18.4% | 29.2% |
|                   | C         | 16.9% | 26.0% | 1.1%  | 0.3%  | 0.5%  | 94.7% | 1.1%  | 97.5% | 1.1%  | 21.9% | 22.3% |
|                   | G         | 23.3% | 24.6% | 0.6%  | 98.1% | 1.8%  | 0.0%  | 0.2%  | 0.4%  | 1.3%  | 28.2% | 18.3% |
|                   | T         | 28.8% | 16.4% | 97.9% | 0.7%  | 0.4%  | 2.6%  | 98.4% | 1.4%  | 0.8%  | 31.4% | 30.2% |
| <b>Conserved</b>  |           |       |       |       |       |       |       |       |       |       |       |       |
| #                 |           | 0     | 0     | 11865 | 11889 | 11791 | 11485 | 11927 | 11817 | 11749 | 0     | 0     |
| %                 |           | 0.0%  | 0.0%  | 97.9% | 98.1% | 97.2% | 94.7% | 98.4% | 97.5% | 96.9% | 0.0%  | 0.0%  |
| <b>Variations</b> |           |       |       |       |       |       |       |       |       |       |       |       |
| %                 | A         | 31.0% | 33.1% | 22.3% | 47.0% | 0.0%  | 51.1% | 21.7% | 29.5% | 0.0%  | 18.4% | 29.2% |
|                   | C         | 16.9% | 26.0% | 49.6% | 15.7% | 18.3% | 0.0%  | 66.7% | 0.0%  | 34.3% | 21.9% | 22.3% |
|                   | G         | 23.3% | 24.6% | 28.1% | 0.0%  | 65.6% | 0.0%  | 11.6% | 15.9% | 40.7% | 28.2% | 18.3% |
|                   | T         | 28.8% | 16.4% | 0.0%  | 37.3% | 16.2% | 48.9% | 0.0%  | 54.5% | 25.0% | 31.4% | 30.2% |

**Table S8H2. Statistics of the MRCA sequence (07. Bor. Dog) to variations of 11mers with TGACTCA (in CNEs and no DHSs)**

| Total             | Position  | 1     | 2     | 3     | 4     | 5     | 6     | 7     | 8     | 9     | 10    | 11    |
|-------------------|-----------|-------|-------|-------|-------|-------|-------|-------|-------|-------|-------|-------|
| 3,090             | Consensus | N     | N     | T     | G     | A     | C     | T     | C     | A     | N     | N     |
| #                 | A         | 1014  | 939   | 31    | 72    | 2941  | 142   | 16    | 32    | 2937  | 917   | 974   |
|                   | C         | 550   | 712   | 48    | 31    | 35    | 2828  | 69    | 2949  | 61    | 463   | 496   |
|                   | G         | 513   | 530   | 38    | 2947  | 90    | 0     | 8     | 34    | 56    | 800   | 573   |
|                   | T         | 1013  | 909   | 2973  | 40    | 24    | 120   | 2997  | 75    | 36    | 910   | 1047  |
| %                 | A         | 32.8% | 30.4% | 1.0%  | 2.3%  | 95.2% | 4.6%  | 0.5%  | 1.0%  | 95.0% | 29.7% | 31.5% |
|                   | C         | 17.8% | 23.0% | 1.6%  | 1.0%  | 1.1%  | 91.5% | 2.2%  | 95.4% | 2.0%  | 15.0% | 16.1% |
|                   | G         | 16.6% | 17.2% | 1.2%  | 95.4% | 2.9%  | 0.0%  | 0.3%  | 1.1%  | 1.8%  | 25.9% | 18.5% |
|                   | T         | 32.8% | 29.4% | 96.2% | 1.3%  | 0.8%  | 3.9%  | 97.0% | 2.4%  | 1.2%  | 29.4% | 33.9% |
| <b>Conserved</b>  |           |       |       |       |       |       |       |       |       |       |       |       |
| #                 |           | 0     | 0     | 2973  | 2947  | 2941  | 2828  | 2997  | 2949  | 2937  | 0     | 0     |
| %                 |           | 0.0%  | 0.0%  | 96.2% | 95.4% | 95.2% | 91.5% | 97.0% | 95.4% | 95.0% | 0.0%  | 0.0%  |
| <b>Variations</b> |           |       |       |       |       |       |       |       |       |       |       |       |
| %                 | A         | 32.8% | 30.4% | 26.5% | 50.3% | 0.0%  | 54.2% | 17.2% | 22.7% | 0.0%  | 29.7% | 31.5% |
|                   | C         | 17.8% | 23.0% | 41.0% | 21.7% | 23.5% | 0.0%  | 74.2% | 0.0%  | 39.9% | 15.0% | 16.1% |
|                   | G         | 16.6% | 17.2% | 32.5% | 0.0%  | 60.4% | 0.0%  | 8.6%  | 24.1% | 36.6% | 25.9% | 18.5% |
|                   | T         | 32.8% | 29.4% | 0.0%  | 28.0% | 16.1% | 45.8% | 0.0%  | 53.2% | 23.5% | 29.4% | 33.9% |

**Table S8H3. Statistics of the MRCA sequence (07. Bor. Dog) to variations of 11mers with TGACTCA (no CNEs)**

| Total             | Position  | 1     | 2     | 3     | 4     | 5     | 6     | 7     | 8     | 9     | 10    | 11    |
|-------------------|-----------|-------|-------|-------|-------|-------|-------|-------|-------|-------|-------|-------|
| 102,996           | Consensus | N     | N     | T     | G     | A     | C     | T     | C     | A     | N     | N     |
| #                 | A         | 28962 | 27599 | 2090  | 4005  | 93401 | 5453  | 1570  | 1519  | 95063 | 24477 | 31664 |
|                   | C         | 21108 | 28669 | 1421  | 1527  | 2027  | 91936 | 5655  | 95296 | 3323  | 20721 | 21436 |
|                   | G         | 20799 | 23587 | 2633  | 95683 | 6273  | 0     | 373   | 1646  | 1878  | 31780 | 20791 |
|                   | T         | 32127 | 23141 | 96852 | 1781  | 1295  | 5607  | 95398 | 4535  | 2732  | 26018 | 29105 |
| %                 | A         | 28.1% | 26.8% | 2.0%  | 3.9%  | 90.7% | 5.3%  | 1.5%  | 1.5%  | 92.3% | 23.8% | 30.7% |
|                   | C         | 20.5% | 27.8% | 1.4%  | 1.5%  | 2.0%  | 89.3% | 5.5%  | 92.5% | 3.2%  | 20.1% | 20.8% |
|                   | G         | 20.2% | 22.9% | 2.6%  | 92.9% | 6.1%  | 0.0%  | 0.4%  | 1.6%  | 1.8%  | 30.9% | 20.2% |
|                   | T         | 31.2% | 22.5% | 94.0% | 1.7%  | 1.3%  | 5.4%  | 92.6% | 4.4%  | 2.7%  | 25.3% | 28.3% |
| <b>Conserved</b>  |           |       |       |       |       |       |       |       |       |       |       |       |
| #                 |           | 0     | 0     | 96852 | 95683 | 93401 | 91936 | 95398 | 95296 | 95063 | 0     | 0     |
| %                 |           | 0.0%  | 0.0%  | 94.0% | 92.9% | 90.7% | 89.3% | 92.6% | 92.5% | 92.3% | 0.0%  | 0.0%  |
| <b>Variations</b> |           |       |       |       |       |       |       |       |       |       |       |       |
| %                 | A         | 28.1% | 26.8% | 34.0% | 54.8% | 0.0%  | 49.3% | 20.7% | 19.7% | 0.0%  | 23.8% | 30.7% |
|                   | C         | 20.5% | 27.8% | 23.1% | 20.9% | 21.1% | 0.0%  | 74.4% | 0.0%  | 41.9% | 20.1% | 20.8% |
|                   | G         | 20.2% | 22.9% | 42.9% | 0.0%  | 65.4% | 0.0%  | 4.9%  | 21.4% | 23.7% | 30.9% | 20.2% |
|                   | T         | 31.2% | 22.5% | 0.0%  | 24.4% | 13.5% | 50.7% | 0.0%  | 58.9% | 34.4% | 25.3% | 28.3% |

**Table S811. Statistics of the MRCA sequence (08. Eua. Mouse) to variations of 11mers with TGACTCA (in CNEs and in DHSS)**

| Total             | Position  | 1     | 2     | 3     | 4     | 5     | 6     | 7     | 8     | 9     | 10    | 11    |
|-------------------|-----------|-------|-------|-------|-------|-------|-------|-------|-------|-------|-------|-------|
| 9,566             | Consensus | N     | N     | T     | G     | A     | C     | T     | C     | A     | N     | N     |
| #                 | A         | 2825  | 2797  | 84    | 110   | 9164  | 239   | 63    | 99    | 9058  | 1640  | 2696  |
|                   | C         | 1751  | 2527  | 117   | 51    | 78    | 9073  | 118   | 9259  | 154   | 2202  | 2258  |
|                   | G         | 2259  | 2760  | 100   | 9336  | 279   | 0     | 38    | 58    | 228   | 2877  | 1876  |
|                   | T         | 2731  | 1482  | 9265  | 69    | 45    | 254   | 9347  | 150   | 126   | 2847  | 2736  |
| %                 | A         | 29.5% | 29.2% | 0.9%  | 1.1%  | 95.8% | 2.5%  | 0.7%  | 1.0%  | 94.7% | 17.1% | 28.2% |
|                   | C         | 18.3% | 26.4% | 1.2%  | 0.5%  | 0.8%  | 94.8% | 1.2%  | 96.8% | 1.6%  | 23.0% | 23.6% |
|                   | G         | 23.6% | 28.9% | 1.0%  | 97.6% | 2.9%  | 0.0%  | 0.4%  | 0.6%  | 2.4%  | 30.1% | 19.6% |
|                   | T         | 28.5% | 15.5% | 96.9% | 0.7%  | 0.5%  | 2.7%  | 97.7% | 1.6%  | 1.3%  | 29.8% | 28.6% |
| <b>Conserved</b>  |           |       |       |       |       |       |       |       |       |       |       |       |
| #                 |           | 0     | 0     | 9265  | 9336  | 9164  | 9073  | 9347  | 9259  | 9058  | 0     | 0     |
| %                 |           | 0.0%  | 0.0%  | 96.9% | 97.6% | 95.8% | 94.8% | 97.7% | 96.8% | 94.7% | 0.0%  | 0.0%  |
| <b>Variations</b> |           |       |       |       |       |       |       |       |       |       |       |       |
| %                 | A         | 29.5% | 29.2% | 27.9% | 47.8% | 0.0%  | 48.5% | 28.8% | 32.2% | 0.0%  | 17.1% | 28.2% |
|                   | C         | 18.3% | 26.4% | 38.9% | 22.2% | 19.4% | 0.0%  | 53.9% | 0.0%  | 30.3% | 23.0% | 23.6% |
|                   | G         | 23.6% | 28.9% | 33.2% | 0.0%  | 69.4% | 0.0%  | 17.4% | 18.9% | 44.9% | 30.1% | 19.6% |
|                   | T         | 28.5% | 15.5% | 0.0%  | 30.0% | 11.2% | 51.5% | 0.0%  | 48.9% | 24.8% | 29.8% | 28.6% |

**Table S812. Statistics of the MRCA sequence (08. Eua. Mouse) to variations of 11mers with TGACTCA (in CNEs and no DHSs)**

| Total             | Position  | 1     | 2     | 3     | 4     | 5     | 6     | 7     | 8     | 9     | 10    | 11    |
|-------------------|-----------|-------|-------|-------|-------|-------|-------|-------|-------|-------|-------|-------|
| 2,161             | Consensus | N     | N     | T     | G     | A     | C     | T     | C     | A     | N     | N     |
| #                 | A         | 676   | 637   | 25    | 66    | 2000  | 79    | 37    | 21    | 2017  | 600   | 683   |
|                   | C         | 383   | 538   | 40    | 28    | 36    | 1986  | 57    | 2045  | 51    | 348   | 353   |
|                   | G         | 392   | 388   | 32    | 2039  | 104   | 0     | 5     | 29    | 50    | 596   | 405   |
|                   | T         | 710   | 598   | 2064  | 28    | 21    | 96    | 2062  | 66    | 43    | 617   | 720   |
| %                 | A         | 31.3% | 29.5% | 1.2%  | 3.1%  | 92.5% | 3.7%  | 1.7%  | 1.0%  | 93.3% | 27.8% | 31.6% |
|                   | C         | 17.7% | 24.9% | 1.9%  | 1.3%  | 1.7%  | 91.9% | 2.6%  | 94.6% | 2.4%  | 16.1% | 16.3% |
|                   | G         | 18.1% | 18.0% | 1.5%  | 94.4% | 4.8%  | 0.0%  | 0.2%  | 1.3%  | 2.3%  | 27.6% | 18.7% |
|                   | T         | 32.9% | 27.7% | 95.5% | 1.3%  | 1.0%  | 4.4%  | 95.4% | 3.1%  | 2.0%  | 28.6% | 33.3% |
| <b>Conserved</b>  |           |       |       |       |       |       |       |       |       |       |       |       |
| #                 |           | 0     | 0     | 2064  | 2039  | 2000  | 1986  | 2062  | 2045  | 2017  | 0     | 0     |
| %                 |           | 0.0%  | 0.0%  | 95.5% | 94.4% | 92.5% | 91.9% | 95.4% | 94.6% | 93.3% | 0.0%  | 0.0%  |
| <b>Variations</b> |           |       |       |       |       |       |       |       |       |       |       |       |
| %                 | A         | 31.3% | 29.5% | 25.8% | 54.1% | 0.0%  | 45.1% | 37.4% | 18.1% | 0.0%  | 27.8% | 31.6% |
|                   | C         | 17.7% | 24.9% | 41.2% | 23.0% | 22.4% | 0.0%  | 57.6% | 0.0%  | 35.4% | 16.1% | 16.3% |
|                   | G         | 18.1% | 18.0% | 33.0% | 0.0%  | 64.6% | 0.0%  | 5.1%  | 25.0% | 34.7% | 27.6% | 18.7% |
|                   | T         | 32.9% | 27.7% | 0.0%  | 23.0% | 13.0% | 54.9% | 0.0%  | 56.9% | 29.9% | 28.6% | 33.3% |

**Table S813. Statistics of the MRCA sequence (08. Eua. Mouse) to variations of 11mers with TGACTCA (no CNEs)**

| Total             | Position  | 1     | 2     | 3     | 4     | 5     | 6     | 7     | 8     | 9     | 10    | 11    |
|-------------------|-----------|-------|-------|-------|-------|-------|-------|-------|-------|-------|-------|-------|
| 45,561            | Consensus | N     | N     | T     | G     | A     | C     | T     | C     | A     | N     | N     |
| #                 | A         | 12030 | 11347 | 1177  | 1856  | 40791 | 2159  | 969   | 864   | 41639 | 9777  | 14072 |
|                   | C         | 9580  | 13322 | 697   | 905   | 910   | 41355 | 2010  | 41678 | 1527  | 9952  | 9957  |
|                   | G         | 9864  | 11854 | 1163  | 42059 | 2971  | 0     | 246   | 970   | 957   | 14850 | 9377  |
|                   | T         | 14087 | 9038  | 42524 | 741   | 889   | 2047  | 42336 | 2049  | 1438  | 10982 | 12155 |
| %                 | A         | 26.4% | 24.9% | 2.6%  | 4.1%  | 89.5% | 4.7%  | 2.1%  | 1.9%  | 91.4% | 21.5% | 30.9% |
|                   | C         | 21.0% | 29.2% | 1.5%  | 2.0%  | 2.0%  | 90.8% | 4.4%  | 91.5% | 3.4%  | 21.8% | 21.9% |
|                   | G         | 21.7% | 26.0% | 2.6%  | 92.3% | 6.5%  | 0.0%  | 0.5%  | 2.1%  | 2.1%  | 32.6% | 20.6% |
|                   | T         | 30.9% | 19.8% | 93.3% | 1.6%  | 2.0%  | 4.5%  | 92.9% | 4.5%  | 3.2%  | 24.1% | 26.7% |
| <b>Conserved</b>  |           |       |       |       |       |       |       |       |       |       |       |       |
| #                 |           | 0     | 0     | 42524 | 42059 | 40791 | 41355 | 42336 | 41678 | 41639 | 0     | 0     |
| %                 |           | 0.0%  | 0.0%  | 93.3% | 92.3% | 89.5% | 90.8% | 92.9% | 91.5% | 91.4% | 0.0%  | 0.0%  |
| <b>Variations</b> |           |       |       |       |       |       |       |       |       |       |       |       |
| %                 | A         | 26.4% | 24.9% | 38.8% | 53.0% | 0.0%  | 51.3% | 30.0% | 22.3% | 0.0%  | 21.5% | 30.9% |
|                   | C         | 21.0% | 29.2% | 23.0% | 25.8% | 19.1% | 0.0%  | 62.3% | 0.0%  | 38.9% | 21.8% | 21.9% |
|                   | G         | 21.7% | 26.0% | 38.3% | 0.0%  | 62.3% | 0.0%  | 7.6%  | 25.0% | 24.4% | 32.6% | 20.6% |
|                   | T         | 30.9% | 19.8% | 0.0%  | 21.2% | 18.6% | 48.7% | 0.0%  | 52.8% | 36.7% | 24.1% | 26.7% |
